# Supplementary material for: Cross-sectional study on the awareness, susceptibility and use of heated tobacco products among adolescents in Guatemala City, Guatemala
Source: PubMed Central journal article supplement — BMJ Open. 2020 Dec 13;10(12):e039792. doi: 10.1136/bmjopen-2020-039792 (PMC7737060; doi:10.1136/bmjopen-2020-039792), 2020-12-13
Supplement: bmjopen-2020-039792.draft_revisions.pdf [file bmjopen-2020-039792.draft_revisions.pdf]

# BMJ Open

BMJ Open is committed to open peer review. As part of this commitment we make the peer review history of every article we publish publicly available.

When an article is published we post the peer reviewers' comments and the authors' responses online. We also post the versions of the paper that were used during peer review. These are the versions that the peer review comments apply to.

The versions of the paper that follow are the versions that were submitted during the peer review process. They are not the versions of record or the final published versions. They should not be cited or distributed as the published version of this manuscript.

BMJ Open is an open access journal and the full, final, typeset and author-corrected version of record of the manuscript is available on our site with no access controls, subscription charges or pay-per-view fees (<http://bmjopen.bmj.com>).

If you have any questions on BMJ Open's open peer review process please email [info.bmjopen@bmj.com](mailto:info.bmjopen@bmj.com)

# BMJ Open

## A cross-sectional study on the awareness, susceptibility, and use of heated tobacco products among adolescents in Guatemala City, Guatemala

|                               |                                                                                                                                                                                                                                                                                                                                                                                                                                                                                                                                                                                                                                                                                                                                                                                                                                       |
|-------------------------------|---------------------------------------------------------------------------------------------------------------------------------------------------------------------------------------------------------------------------------------------------------------------------------------------------------------------------------------------------------------------------------------------------------------------------------------------------------------------------------------------------------------------------------------------------------------------------------------------------------------------------------------------------------------------------------------------------------------------------------------------------------------------------------------------------------------------------------------|
| Journal:                      | <i>BMJ Open</i>                                                                                                                                                                                                                                                                                                                                                                                                                                                                                                                                                                                                                                                                                                                                                                                                                       |
| Manuscript ID                 | bmjopen-2020-039792                                                                                                                                                                                                                                                                                                                                                                                                                                                                                                                                                                                                                                                                                                                                                                                                                   |
| Article Type:                 | Original research                                                                                                                                                                                                                                                                                                                                                                                                                                                                                                                                                                                                                                                                                                                                                                                                                     |
| Date Submitted by the Author: | 27-Apr-2020                                                                                                                                                                                                                                                                                                                                                                                                                                                                                                                                                                                                                                                                                                                                                                                                                           |
| Complete List of Authors:     | Gottschlich, Anna; The University of British Columbia, School of Population and Public Health; Universidad Rafael Landivar, Instituto de Investigación y Estudios Superiores en Ciencias de la Salud<br>Mus, Sophia; Universidad Rafael Landivar, Instituto de Investigación y Estudios Superiores en Ciencias de la Salud<br>Monzon, Jose Carlos; Universidad Rafael Landivar, Instituto de Investigación y Estudios Superiores en Ciencias de la Salud<br>Thrasher, Jim; University of South Carolina, Department of Health Promotion, Education & Behavior; National Institute of Public Health, Center for Population Health Research<br>Barnoya, Joaquin; Unidad de Cirugia Cardiovascular, Departamento de Investigacion; Universidad Rafael Landivar, Instituto de Investigación y Estudios Superiores en Ciencias de la Salud |
| Keywords:                     | EPIDEMIOLOGY, PUBLIC HEALTH, Community child health < PAEDIATRICS                                                                                                                                                                                                                                                                                                                                                                                                                                                                                                                                                                                                                                                                                                                                                                     |
|                               |                                                                                                                                                                                                                                                                                                                                                                                                                                                                                                                                                                                                                                                                                                                                                                                                                                       |

SCHOLARONE™  
Manuscripts

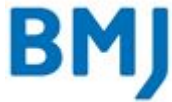

I, the Submitting Author has the right to grant and does grant on behalf of all authors of the Work (as defined in the below author licence), an exclusive licence and/or a non-exclusive licence for contributions from authors who are: i) UK Crown employees; ii) where BMJ has agreed a CC-BY licence shall apply, and/or iii) in accordance with the terms applicable for US Federal Government officers or employees acting as part of their official duties; on a worldwide, perpetual, irrevocable, royalty-free basis to BMJ Publishing Group Ltd ("BMJ") its licensees and where the relevant Journal is co-owned by BMJ to the co-owners of the Journal, to publish the Work in this journal and any other BMJ products and to exploit all rights, as set out in our [licence](#).

The Submitting Author accepts and understands that any supply made under these terms is made by BMJ to the Submitting Author unless you are acting as an employee on behalf of your employer or a postgraduate student of an affiliated institution which is paying any applicable article publishing charge ("APC") for Open Access articles. Where the Submitting Author wishes to make the Work available on an Open Access basis (and intends to pay the relevant APC), the terms of reuse of such Open Access shall be governed by a Creative Commons licence – details of these licences and which [Creative Commons](#) licence will apply to this Work are set out in our licence referred to above.

Other than as permitted in any relevant BMJ Author's Self Archiving Policies, I confirm this Work has not been accepted for publication elsewhere, is not being considered for publication elsewhere and does not duplicate material already published. I confirm all authors consent to publication of this Work and authorise the granting of this licence.

1  
2  
3  
4  
5  
6  
7  
8  
9  
10  
11  
12  
13  
14  
15  
16  
17  
18  
19  
20  
21  
22  
23  
24  
25  
26  
27  
28  
29  
30  
31  
32  
33  
34  
35  
36  
37  
38  
39  
40  
41  
42  
43  
44  
45  
46  
47  
48  
49  
50  
51  
52  
53  
54  
55  
56  
57  
58  
59  
60

## A cross-sectional study on the awareness, susceptibility, and use of heated tobacco products among adolescents in Guatemala City, Guatemala

Anna Gottschlich<sup>1,2</sup>, Sophia Mus<sup>1</sup>, Jose Carlos Monzon<sup>1</sup>, James F. Thrasher<sup>3,4</sup>, Joaquin Barnoya<sup>1,5</sup>

1. Instituto de Investigación y Estudios Superiores en Ciencias de la Salud, Universidad Rafael Landivar, Guatemala
2. School of Population and Public Health, University of British Columbia, Vancouver, British Columbia, Canada
3. Department of Health Promotion, Education & Behavior, Arnold School of Public Health, University of South Carolina, Columbia, South Carolina, USA
4. Center for Population Health Research, National Institute of Public Health, Cuernavaca, Mexico
5. Unidad de Cirugía Cardiovascular de Guatemala, Guatemala City, Guatemala

Corresponding Author:  
Dr. Anna Gottschlich  
Global Control of HPV Related Diseases  
BC Women's Hospital and Health Centre  
Room H203 – 4500 Oak Street (Box 42)  
Vancouver, BC V6H 3N1  
Phone: +604 649-6044  
E-mail: annagott@umich.edu  
ORCID ID: 0000-0002-3095-2323

Abstract: 289; Words: 3680; Tables: 3; Figures: 0; References: 36

## Abstract

*Objectives:* Heated tobacco products (HTPs) are increasingly marketed worldwide, yet limited research on HTPs has been conducted either in low- and middle-income countries (LMICs) or amongst adolescents. Guatemala is one of the few LMICs where HTPs are available. This study examined the prevalence and correlates of HTP awareness, susceptibility, and use among adolescents in Guatemala.

*Design, Setting, and Participants:* A cross-sectional survey on HTP awareness, susceptibility, and use was conducted among 2870 students between the ages of 13 and 17 in private schools in Guatemala City, Guatemala.

*Primary and secondary outcome measures:* The primary outcome was susceptibility to future use of HTP among school-aged current and never smokers in Guatemala. We also explored awareness and use of HTPs. Multivariate binomial regression models were used to explore associations between these outcomes and both sociodemographic factors and established smoking correlates.

*Results:* Of all students (n=2870), about half were aware of HTPs (52.4%) and susceptible to future or continued use (52.4%). Whereas 8.4% of students had tried HTPs in the lifetime (but not in the last month), only 2.9% used HTPs in the past month. Independent correlates of HTP susceptibility and use included: use of other tobacco products (current smoking: AOR=10.53 & 34.93, respectively; current e-cigarette use: AOR=21.87 & 59.31, respectively), moderate alcohol consumption (AOR=1.49 & 5.99, respectively), marijuana use in the past 30 days (AOR=3.49 & 12.57, respectively), and having friends who use HTPs (AOR = 1.83 & 44.72, respectively).

1  
2  
3 *Conclusions:* Among this sample of adolescents in Guatemala City, where tobacco  
4 control is weak, the prevalence of HTP use was low but susceptibility to future use was  
5 high. Prevention and intervention strategies could target adolescents who use other  
6 substances, as well as those exposed to tobacco products through family and friends.  
7  
8  
9  
10  
11  
12  
13  
14  
15  
16  
17  
18  
19  
20  
21  
22  
23  
24  
25  
26  
27  
28  
29  
30  
31  
32  
33  
34  
35  
36  
37  
38  
39  
40  
41  
42  
43  
44  
45  
46  
47  
48  
49  
50  
51  
52  
53  
54  
55  
56  
57  
58  
59  
60

**Strengths and Limitations:**

- Heated tobacco products (HTPs) are increasingly popular in the few countries where they have been introduced, but little is known about adolescent use or use in LMICs, making the topic of this research crucial to the development of control strategies.
- Guatemala, which has weak tobacco control policies, is one of the few LMICs where HTPs are now widely available, making it an ideal location to assess use and susceptibility to future use of these products.
- This study is one of the first to investigate current use of HTPs as well as susceptibility to future use among school-aged children in an LMIC and provides critical evidence which can be used to effectively implement intervention and prevention strategies to reduce the use of tobacco products among adolescents.
- The data is self-reported and participants were recruited from private schools, meaning there is a chance of misreporting and the sample is not representative of the country as a whole.

## Introduction

The increase in popularity of non-conventional tobacco products has further complicated an already challenging tobacco control landscape. For example, electronic cigarettes (e-cigarettes) increasingly appear more appealing to adolescents than conventional cigarettes; a considerable proportion of adolescent e-cigarette users have never smoked conventional cigarettes.[1,2] The appeal of e-cigarettes in younger populations is a key argument for strong regulations that would decrease youth access (e.g., increase price and legal age of purchase) and appeal (e.g., banning flavors and marketing), often outweighing arguments that policies should promote e-cigarette use among established smokers who may benefit from consumption of a less harmful product.[3] Recently, tobacco product regulation in some countries has been additionally complicated by the introduction of novel heated tobacco products, or HTPs. HTPs heat but do not burn tobacco, producing an aerosol with nicotine that does not contain or has lower levels of many of the harmful chemicals in cigarette smoke.[4,5] HTPs appeal to some adult smokers and use has been rapidly increasing in some high-income countries where they have been introduced, suggesting a potential public health benefit, similar to that of e-cigarettes.[6–8] However, the appeal of HTPs among adolescents, particularly those who would otherwise not use tobacco, is relatively unknown.

Philip Morris's HTP, IQOS, was introduced in some countries in 2014, and advertised as a less harmful alternative for smokers who want to reduce exposure to harmful chemicals produced by tobacco combustion.[9] By 2020 it was available in at least 52 countries worldwide, including Guatemala[4,5,10] but, due to the fairly recent introduction to the market, little is known about its awareness and use, particularly



1  
2  
3 among adolescents. Nonetheless, HTPs appear to quickly penetrate markets: for  
4  
5 example, one study found that among young adults in South Korea, only 3 months after  
6  
7 IQOS was introduced into the market, 38% were aware of the product and 3.5% were  
8  
9 current users.[11] Additionally, in 2018, a study of older adolescents (16-19 years old) in  
10  
11 England, Canada and the USA (where HTPs were either only available in limited areas or  
12  
13 not available at the time of the study) reported that among all participants, 7% were  
14  
15 aware of IQOS, 45% susceptible to future use, and 38% interested in trying IQOS; these  
16  
17 percentages were higher in the current smoker and e-cigarette user subpopulation.[12]  
18  
19 Notably, susceptibility to IQOS use (25%) was higher than susceptibility to conventional  
20  
21 cigarette use (19%) among never smokers or e-cigarette users, suggesting its potential  
22  
23 appeal among adolescents who otherwise would not use tobacco products.[12]  
24  
25  
26  
27

28  
29 To the best of our knowledge, only one study has reported rates of HTP use  
30  
31 among adolescents: this study, from 2019, found that among 12- to 18-year-old South  
32  
33 Koreans, ever use was 2.8%.[13] Studies among adults in high-income countries (HICs)  
34  
35 have shown that HTP awareness and use tends to be higher among males, young adults,  
36  
37 cigarette and e-cigarette smokers, and smokers with intentions to quit – all consistent risk  
38  
39 factors for e-cigarette use.[11,14,15] Although currently the correlates of HTP use among  
40  
41 adolescents are relatively unknown, they may resemble those found for e-cigarette use:  
42  
43 male, current or ever smoker, having peers or parents who smoke, sensation seeking, and  
44  
45 technophilia.[16–19]  
46  
47  
48

49 *Study context:*

50  
51 Guatemala is a middle-income country in Central America that signed and ratified  
52  
53 the WHO's Framework Convention on Tobacco Control (FCTC) in 2005. However, as  
54  
55  
56  
57  
58  
59  
60

1  
2  
3 of 2020, the only FCTC recommended policy that has been implemented is smoke-free  
4 environments (Article 8), and this has been executed with poor enforcement.[20] In  
5  
6  
7  
8 2015, the prevalence of adolescent cigarette use in Guatemala was 12.9% and the  
9  
10 prevalence of adolescent e-cigarette use was 5.7% and 5.2% among males and females,  
11  
12 respectively.[21,22] However, there is no current data on HTP use among adolescents in  
13  
14 Latin America, or any other LMIC. Therefore, this study aims to address this gap by  
15  
16 evaluating the prevalence and correlates of HTP awareness, susceptibility, and use among  
17  
18 adolescents in Guatemala to inform prevention and intervention strategies to target those  
19  
20 at highest risk.  
21  
22  
23  
24  
25

## 26 **Methods**

### 27 *Survey design and data*

28  
29  
30  
31 Adolescents, grades 8-12, were recruited from private schools in Guatemala City  
32  
33 for this cross-sectional study. Of the 30 invited schools, six declined, 14 did not respond,  
34  
35 and 10 agreed to participate. While students in grades 8-11 were recruited from all  
36  
37 participating schools, students in the 12<sup>th</sup> grade were only recruited from five of the 10  
38  
39 participating schools. We obtained both passive consent from parents and assent from  
40  
41 participating students. Data were collected between May and September of 2019, using a  
42  
43 paper-based, self-administered, Spanish-language survey on socio-demographics and  
44  
45 tobacco product susceptibility, use, and risk factors. The survey was previously fielded  
46  
47 in Mexico and subsequently adapted for Guatemala and pre-tested to ensure  
48  
49 comprehension.[16] This protocol was approved by the Institutional Ethics Committee of  
50  
51  
52  
53  
54  
55  
56  
57  
58  
59  
60

1  
2  
3 the Institute of Nutrition of Central America and Panama (INCAP), approval number  
4  
5 087/2019.  
6

### 7 *Patient and public involvement*

8  
9  
10 The research questions and outcome measures, including the study questionnaire,  
11  
12 were based on our previous research on e-cigarettes in Guatemala and Mexico.[23] The  
13  
14 instrument was piloted among Guatemalan adolescents from schools not included in the  
15  
16 study sample to ensure comprehension and edited by local researchers to fit the country-  
17  
18 specific environment. Participating schools were first involved four months prior to data  
19  
20 collection and were asked to review the study protocol. Certain schools requested that  
21  
22 the study team include 12<sup>th</sup> graders along with the proposed younger grades in the study  
23  
24 sample, and this was accommodated by the study team. Schools were aware of the time  
25  
26 required to complete the survey and surveys were only conducted in the time and place  
27  
28 allocated by each school. Additionally, a letter of support from the Ministry of Health  
29  
30 National Commission for the Prevention and Control of Chronic Disease was obtained  
31  
32 prior to the start of the study. Results of this study will be shared with enrolled schools  
33  
34 and support will be granted to develop and tailor intervention strategies. Results will  
35  
36 also be disseminated to authorities and stakeholders for policy development.  
37  
38  
39  
40  
41  
42  
43  
44

### 45 *Outcome variables*

46  
47 We assessed HTP awareness (yes, no) by showing an image and description of  
48  
49 IQOS, the only HTP available Guatemala. Susceptibility to future use of HTPs was  
50  
51 assessed for all participants with a single question adapted from Pierce et al.'s validated  
52  
53 scale.[24] This question (prompt: "If one of your friends offered you a heated tobacco  
54  
55  
56  
57  
58  
59  
60

1  
2  
3 product like IQOS, would you use it?"; possible responses: "Definitely yes", "Probably  
4 yes", "Probably no", "Definitely no") has been shown to predict smoking initiation with  
5 the same accuracy as the full scale among Latin American youth.[25] Those who  
6 answered "Definitely yes", "Probably yes", or "Probably no" were considered susceptible  
7 to continued or future use, while those who reported "Definitely no" were categorized as  
8 unsusceptible, similar to prior studies.[16] Students were also asked if they had ever  
9 tried HTPs (yes, no) and, to assess current use, if they had used HTPs in the prior 30  
10 days. Using the above described definitions, HTP use was characterized as the following  
11 four exclusive categories: never used and unsusceptible to future use; never used but  
12 susceptible to future use; ever used, but not currently; and current use.  
13  
14  
15  
16  
17  
18  
19  
20  
21  
22  
23  
24  
25  
26  
27

### 28 *Independent variables*

29  
30 Sociodemographic variables that were assessed included sex (male, female), age  
31 (continuous), grade (8<sup>th</sup>-9<sup>th</sup> vs 10<sup>th</sup>-12<sup>th</sup>), school performance (averaging < 80%, 80-89%,  
32 or >90% ), highest educational attainment by either parent (primary school or less, high  
33 school or technical school, university or more), and family affluence. To assess family  
34 affluence, we used the 4-item Family Affluent Scale (FAS) (i.e., "How many cars does  
35 your family have?", "Do you have your own bedroom?", "How many times did your  
36 family go on vacation last year?" and "How many computers are in your house?"), which  
37 is a summative measure validated among other adolescent populations.[26]  
38  
39  
40  
41  
42  
43  
44  
45  
46  
47  
48

49 Established risk factors for smoking and e-cigarette use were also considered,  
50 including other substance use (e.g. tobacco products, alcohol, drugs). Use of cigarettes  
51 and e-cigarettes were queried and derived consistent with our definition for HTP use  
52  
53  
54  
55  
56  
57  
58  
59  
60

1  
2  
3 (never used and unsusceptible to future use; never used but susceptible to future use; ever  
4 used, but not currently; and current use). Additionally, we assessed ever use of any  
5 tobacco product (yes/no), first product used among ever-users (cigarette, e-cigarette,  
6 HTP, other), and dual use of products (yes/no; if yes, which products). Ever use of  
7 alcohol, current use (last 30 days), and recent binge drinking (4 or more drinks in one  
8 sitting in the last 30 days) were assessed and used to derive exclusive categories. We  
9 also considered ever and current marijuana use. Smoking, e-cigarette, and HTP use were  
10 measured separately for both family members (yes, no) and friends (yes, no among five  
11 closest friends).

12  
13  
14  
15  
16  
17  
18  
19  
20  
21  
22  
23  
24 Other common risk factors for smoking and vaping that were considered in this  
25 study included frequency of exposure to internet advertising (i.e., never;  
26 rarely/sometimes; often/very often) for both smoking and e-cigarettes, assessed  
27 separately. Sensation seeking was evaluated with four items (i.e., “I would like to  
28 explore strange places”, “I like to do things that scare me”, “I like new and exciting  
29 experiences, even when I am breaking the rules”, and “Sometimes I do crazy things just  
30 for fun”) with Likert responses (1=strongly disagree; 5=strongly agree) and averaged  
31 together (alpha = 0.77). We also measured “technophilia”, which is a positive orientation  
32 toward new technology adoption, using seven items that have been previously shown to  
33 independently predict e-cigarette, but not smoking, initiation (i.e., having internet access  
34 in their room; having a laptop in their room; owning a tablet; having a cellphone with  
35 internet access; frequency of using social media; enjoyment from using the internet; level  
36 of interest in new technologies).[27,28]

### *Statistical analysis*

Binary logistic regression was used to estimate crude odds ratios (OR) for the association between each independent variable and key outcomes: 1. HTP awareness (yes, no) among all participants; 2. Susceptibility to future HTP use (yes, no) among all participants; 3. Ever HTP use (yes, no) among non-current users; and 4. Current HTP use among all participants. A cut off of less than 5% missing was a necessary criterion for inclusion of each variable in the models. However, no variables had more than 5% missing data, and thus all were included in the final analyses. Parent educational attainment was borderline (4.8%) so a “missing” category was included for this variable. Due to the low prevalence of HTP use, particularly current use, categories of cigarette, e-cigarette, and alcohol use were collapsed in some models to increase small cell counts. In the current HTP use model, cigarette and e-cigarette use was collapsed to non-current vs. current and alcohol was collapsed to non-recent-binge vs. recent-binge. Next, for each outcome, multivariate logistic regression models were calculated to estimate the adjusted ORs (AORs) associated with each independent variable, adjusting for all other independent variables. Crude and adjusted models included a random intercept to adjust for non-independence of observations within schools. All analyses were conducted in R version 3.4.4.

## **Results**

### *Participants*

At the 10 schools, 3311 students were invited to participate and 2870 (87%) completed the survey: 271 (8%) were absent, 135 (4%) did not have permission from

1  
2  
3 their parents, 28 (<1%) refused and 2 (<1%) did not speak Spanish. Five (<1%) students  
4 who did not complete the survey gave no reason as to why they did not wish to  
5 participate.  
6  
7  
8  
9

10 About half of participants were male and the mean age was slightly over 15 years  
11 (Table 1). Most respondents were in the higher grades (grades 10, 11, and 12) (56.9%),  
12 had an average grade of 80% or higher (81.2%), and had at least one parent with a  
13 university degree or higher (75%).  
14  
15  
16  
17  
18

19 Over half (52.4%) of students reported having heard of HTPs and 8.4% and 2.9%  
20 reported ever- (but not current) and current use of HTPs, respectively. In the entire  
21 sample, 52% were susceptible to future HTP use. Nearly two-thirds (58.4%) had used a  
22 tobacco product at some point in their life; most ever-tobacco users first used e-cigarettes  
23 (54.0%) or cigarettes (43.2%). Only 1.5% of ever-tobacco users first used an HTP.  
24  
25  
26  
27  
28  
29  
30  
31  
32  
33  
34  
35  
36  
37  
38  
39  
40  
41  
42  
43  
44  
45  
46  
47  
48  
49  
50  
51  
52  
53  
54  
55  
56  
57  
58  
59  
60

Considering other substances, one quarter (24%) reported never consuming  
alcohol and 20% reported at least one instance of binge drinking in the past 30 days.  
Most (90.2%) had never used marijuana. About 50% of students report seeing online  
cigarette or e-cigarette advertising rarely or sometimes when they use the internet.  
Family use of cigarettes, e-cigarettes, or HTPs was 35.8%, 21.0%, and 13.8%,

1  
2  
3 respectively. Concerning friend cigarette or e-cigarette use, the corresponding  
4  
5 percentages were 54.1%, 63.6%, and 14.8%, respectively.  
6  
7

### 8 9 10 *Factors associated with HTP awareness and susceptibility*

11  
12 About half (52.4%) of students reported awareness of HTPs. HTP awareness was  
13  
14 higher for ever- (AOR = 1.65, 95% CI = 1.23, 2.21) and current users of e-cigarettes  
15  
16 (AOR = 2.10, 95% CI = 1.47, 2.99), binge drinkers (AOR = 1.84, 95% CI = 1.28, 2.65)  
17  
18 and those exposed to medium (AOR = 1.39, 95% CI = 1.10, 1.75) and high levels of  
19  
20 online e-cigarette advertising (AOR = 1.76, 95% CI = 1.26, 2.46) (Table 2).  
21  
22

23  
24 Additionally, family smoking (AOR = 1.31, 95% CI = 1.07, 1.60) and HTP use (AOR =  
25  
26 1.60, 95% CI = 1.22, 2.09), family affluence (AOR = 1.10, 95% CI = 1.04, 1.17), and  
27  
28 friend HTP use (AOR = 4.15, 95% CI = 3.11, 5.55) were positively associated with  
29  
30 participant HTP awareness.  
31  
32

33  
34 In the entire sample, 52.4% were susceptible to continued or future HTP use.  
35  
36 Compared to unsusceptible never-smokers, higher susceptibility was found among  
37  
38 susceptible never- (AOR = 6.18, 95% CI = 4.72, 8.07), ever- (AOR = 6.93, 95% CI =  
39  
40 5.02, 9.57), and current smokers (AOR = 10.53, 95% CI = 5.92, 18.71), as well as  
41  
42 susceptible never- (AOR = 12.18, 95% CI = 7.79, 19.03), ever- (AOR = 11.08, 95% CI =  
43  
44 7.07, 17.37), and current e-cigarettes users (AOR = 21.87, 95% CI = 13.02, 36.71).  
45  
46 Similarly, ever- (AOR = 1.73, 95% CI = 1.25, 2.41), current (AOR = 1.49, 95% CI =  
47  
48 1.03, 2.17), and binge drinkers (AOR = 1.65, 95% CI = 1.04, 2.60), and current  
49  
50 marijuana users (AOR = 3.49, 95% CI = 1.40, 2.60) were more likely to be susceptible to  
51  
52 HTP use. Finally, having a friend who used HTPs (AOR = 1.83, 95% CI = 1.31, 2.57)  
53  
54  
55  
56  
57  
58  
59  
60



1  
2  
3 and higher sensation-seeking scores (AOR = 1.41, 95% CI = 1.19, 1.68) were positively  
4 associated with HTP susceptibility.  
5  
6  
7  
8  
9

### 10 *Factors associated with HTP use (ever and current)*

11  
12 Among non-current HTP users, 8.6% had tried HTPs. Students who were ever-  
13 (AOR = 3.73, 95% CI = 2.03, 6.82) or current smokers (AOR = 6.63, 95% CI = 3.20,  
14 13.74), or ever- (AOR = 9.31, 95% CI = 2.61, 33.23) or current e-cigarette users (AOR =  
15 10.40, 95% CI = 2.75, 39.17) were more likely to be ever HTP users (Table 3). Those  
16 who reported binge drinking (AOR = 2.53, 95% CI = 1.08, 5.95) and marijuana use  
17 (AOR = 2.29, 95% CI = 1.27, 4.13) were also more likely to be ever-HTP users. Family  
18 smoking (AOR = 1.70, 95% CI = 1.19, 2.45) and friend HTP use (AOR = 7.28, 95% CI =  
19 4.64, 11.43) were associated with higher odds of ever use of HTPs. Higher family  
20 affluence was also associated with ever use (AOR = 1.15, 95% CI = 1.02, 1.31).  
21  
22  
23  
24  
25  
26  
27  
28  
29  
30  
31  
32

33 In the overall population, 2.9% were current HTP users. The odds of current HTP  
34 use was higher for both cigarette (AOR = 6.14, 95% CI = 2.71, 13.93) and e-cigarette  
35 users (AOR = 84.90, 95% CI = 24.19, 298.22). Having family members who smoked  
36 (AOR = 3.25, 95% CI = 1.51, 7.02) and friends who used HTPs (AOR = 44.72, 95% CI =  
37 20.08, 99.58) were associated with higher odds current use of HTPs.  
38  
39  
40  
41  
42  
43  
44  
45  
46

### 47 **Discussion**

48  
49 We investigated HTP use among adolescents in private schools in Guatemala  
50 City, where HTPs are readily available.[29] About half of the students were aware of  
51 HTPs (54.2%) and susceptible to (54.2%) future use of HTPs, although ever use among  
52  
53  
54  
55  
56  
57  
58  
59  
60

1  
2  
3 non-current users (8.4%) and current use (2.9%) were low compared to smoking (21.0%  
4 and 8.7%, respectively) and e-cigarette use (28.3% and 27.7%, respectively).

5  
6  
7 Furthermore, almost none of the students who had ever used any tobacco product  
8 reported using HTPs as their first tobacco product (1.5%), and nearly all current HTP  
9  
10 users also either smoked cigarettes (52.4%) or used e-cigarettes (92.9%). These results  
11  
12 suggest that in this population HTPs are not a gateway tobacco product, as has been  
13  
14 reported for e-cigarettes in many locations, including in Latin America, even though there  
15  
16 is evidence against this claim.[30–32] However, the high prevalence of susceptibility to  
17  
18 future use that we found suggests that this may change if HTPs become more popular or  
19  
20 accessible.  
21  
22  
23  
24  
25

26  
27 Currently, the available data on HTP awareness and use is from HICs with  
28  
29 stronger tobacco control policies, making cross-country comparisons challenging. One  
30  
31 study of 16- to 19-year-old adolescents in Canada, the United States, and England, found  
32  
33 lower levels of awareness (7% vs. 52.4%) and susceptibility (45.0% vs. 52.4%) compared  
34  
35 to our sample. However, this study only included never-smokers and never-vapers.  
36  
37 Likewise, we found that HTP susceptibility was associated with smoking and e-cigarette  
38  
39 use. Additionally, use of alcohol, use of marijuana, family and friend use of tobacco  
40  
41 products and higher sensation-seeking were all positively associated with susceptibility to  
42  
43 continued and future use of HTPs in adolescents; these variables have not been  
44  
45 previously studied, but the associations we found are not unexpected given prior research  
46  
47 on e-cigarettes susceptibility and use.[16–19] In the end, our results support Jessor's  
48  
49 Problem Behavior Theory, which hypothesizes that substance use and other risk  
50  
51 behaviors tend to cluster together.[33]  
52  
53  
54  
55  
56  
57  
58  
59  
60

1  
2  
3 To our knowledge, the only other study of adolescents' current use of HTPs  
4 comes from South Korea.[13] This 2019 study among 12-18 year old Korean adolescents  
5 found lower ever-use HTP rates than in our sample (2.8% vs. 8.4%), despite the fact that  
6 HTPs have been on the market for longer in Korea than Guatemala. [13] These results  
7 may reflect the fact that our sample over-represented higher socioeconomic status  
8 students, given that we only sampled private schools. However, according to the 2018  
9 census, 37% of middle school students and 70% of high school students in Guatemala  
10 City attend private schools.[34] Our study goes beyond the Korean study by assessing  
11 correlates of use, which appear similar to those for e-cigarette use among  
12 adolescents.[16–18] For example, correlates of HTP use in our study are also as  
13 predictors of e-cigarette use in Mexico (use of cigarettes, alcohol, and marijuana, family  
14 use of cigarettes, and sensation-seeking behavior).[16] However, we also found that e-  
15 cigarette use was a correlate of HTP use.  
16  
17  
18  
19  
20  
21  
22  
23  
24  
25  
26  
27  
28  
29  
30  
31  
32

33 To the best of our knowledge, our study is the first to assess HTP awareness or  
34 use amongst adolescents from LMICs. Furthermore, we did so in a country with weak  
35 FCTC implementation where HTPs, e-cigarettes and cigarettes are all readily available.  
36 In addition, we used a previously implemented survey that includes novel predictors (e.g.  
37 technophilia, sensation-seeking) of non-conventional tobacco product use. However, our  
38 results must be interpreted in the context of the study's limitations. All data were self-  
39 reported, although the directionality of any biases is not clear. This resulted in an  
40 expected amount of uncertainty due to misreporting. The sample was recruited from  
41 private schools, which predominantly serve middle and high-income students. Therefore,  
42 generalizability to the entire country is limited. Additionally, only four students  
43  
44  
45  
46  
47  
48  
49  
50  
51  
52  
53  
54  
55  
56  
57  
58  
59  
60

1  
2  
3 exclusively used HTPs (i.e., did not also smoke or use e-cigarettes), and thus is it hard to  
4 draw conclusions about this group. Because of this, model estimates include some large  
5 odds ratios (with similarly large confidence intervals) when examining associations  
6 between HTP use and other tobacco product use. These estimates could be made more  
7 precise with larger sample sizes, but they may also reflect the fact that HTP use typically  
8 follows use of other tobacco products and substances – in other words, at this time HTPs  
9 do not appear to be a “gateway” product for Guatemalan youth. Finally, the data are  
10 cross-sectional and so preclude causal inference for some time-varying variables in the  
11 analyses.  
12  
13  
14  
15  
16  
17  
18  
19  
20  
21  
22  
23

24 Despite its limitations, this study is the first of its kind to examine HTP use and its  
25 correlates among adolescents in an LMIC. While current HTP use is low in our study  
26 population, a large portion of the population is susceptible to continued or future use and  
27 rates of use may increase as IQOS and other HTP products become more widely  
28 available. This phenomenon could be seen across the world, where there may be a rapid  
29 increase in consumption as availability grows. Particularly concerning is the introduction  
30 of flavored HTPs in some countries, including sticks that include flavor capsules in the  
31 filter that the consumer can crush to make the aerosol taste like diverse flavors, ranging  
32 from mint to ginger and bubble gum.[35] Flavor capsules in cigarettes, which include an  
33 even broader range of flavors that are popular with youth (e.g., mango, mint, berry), are  
34 increasingly popular around the world, including in Guatemala, where they represented  
35 32% of the cigarette market in 2017.[36] Currently, it does not seem like HTPs are  
36 gateway tobacco products for adolescents, as most current users in our sample report  
37 initially using e-cigarettes. However, as HTPs become more common and integrate new  
38  
39  
40  
41  
42  
43  
44  
45  
46  
47  
48  
49  
50  
51  
52  
53  
54  
55  
56  
57  
58  
59  
60

1  
2  
3 flavors and flavor technologies, it is possible that this could change, particularly as the  
4  
5 global e-cigarette market might become more regulated. It is critical to identify who is at  
6  
7 risk for HTP uptake so that control and prevention strategies can be prioritized for this  
8  
9 high-risk group. This study adds evidence to the literature to assist decision-makers in  
10  
11 building a profile to identify the subset of adolescents who are most at risk for HTP use,  
12  
13 allowing for the development of tailored prevention programs which could reduce current  
14  
15 HTP use and deter future use among adolescents. Future studies should investigate  
16  
17 whether rates of HTP use and predictors for HTP use are similar among other populations  
18  
19 in Guatemala, including adults and other socio-economic groups as well as explore how  
20  
21 adolescent e-cigarette users transition to HTP use.  
22  
23  
24  
25  
26  
27  
28  
29  
30  
31  
32  
33  
34  
35  
36  
37  
38  
39  
40  
41  
42  
43  
44  
45  
46  
47  
48  
49  
50  
51  
52  
53  
54  
55  
56  
57  
58  
59  
60

1  
2  
3 **Funding:** This work was supported by Fogarty International Center of the National  
4  
5 Institutes of Health under award number R01 TW010652. The content is solely the  
6  
7 responsibility of the authors and does not necessarily represent the official views of the  
8  
9 National Institutes of Health.  
10

11  
12 **Competing Interests:** None declared.  
13

14 **Author Contributions:** AG – analysis design and execution, drafted manuscript; SM –  
15  
16 study design, questionnaire design, data collection, manuscript review and approval; JM  
17  
18 – study design, questionnaire design, data collection, manuscript review and approval; JT  
19  
20 – study design, questionnaire design, analysis design, manuscript review and approval;  
21  
22  
23 JB – study design, questionnaire design, data collection, manuscript review and approval,  
24  
25 stakeholder engagement  
26  
27

28 **Data Availability Statement:** The datasets used and/or analyzed during the current study  
29  
30 are available from the corresponding author on reasonable request.  
31  
32  
33  
34  
35  
36  
37  
38  
39  
40  
41  
42  
43  
44  
45  
46  
47  
48  
49  
50  
51  
52  
53  
54  
55  
56  
57  
58  
59  
60

## References

- 1 Demissie Z, Jones SE, Clayton HB, *et al.* Adolescent risk behaviors and use of electronic vapor products and cigarettes. *Pediatrics* 2017;**139**. doi:10.1542/peds.2016-2921
- 2 Carroll Chapman SL, Wu LT. E-cigarette prevalence and correlates of use among adolescents versus adults: A review and comparison. *J Psychiatr Res* 2014;**54**:43–54. doi:10.1016/j.jpsychires.2014.03.005
- 3 Frieden TR, Jaffe HW, Richards CL, *et al.* E-Cigarette Use Among Youth and Young Adults. A Report of the Surgeon General. GA:U.S.: 2016.
- 4 WHO. Heated tobacco products (HTPs) information sheet. *Who* 2018;:2–3.
- 5 Auer R, Concha-Lozano N, Jacot-Sadowski I, *et al.* Heat-not-burn tobacco cigarettes: Smoke by any other name. *JAMA Intern Med* 2017;**177**:1050–2. doi:10.1001/jamainternmed.2017.1419
- 6 Cruz-jiménez L, Barrientos-gutiérrez I, Coutiño-escamilla L. Adult Smokers' Awareness and Interest in Trying Heated Tobacco Products : Perspectives from Mexico , where HTPs and E-Cigarettes Are Banned. Published Online First: 2020. doi:10.3390/ijerph17072173
- 7 Caputi TL, Leas E, Dredze M, *et al.* They're heating up: Internet search query trends reveal significant public interest in heat-not-burn tobacco products. *PLoS One* 2017;**12**:1–7. doi:10.1371/journal.pone.0185735
- 8 Liu X, Lugo A, Spizzichino L, *et al.* Heat-not-burn tobacco products are getting hot in Italy. *J Epidemiol* 2018;**28**:274–5. doi:10.2188/jea.JE20180040
- 9 Philip Morris International. Tobacco Meets Technology.
- 10 Glantz SA. Heated tobacco products: The example of IQOS. *Tob Control* 2018;**27**:s3–6. doi:10.1136/tobaccocontrol-2018-054601
- 11 Kim J, Yu H, Lee S, *et al.* Awareness, experience and prevalence of heated tobacco product, IQOS, among young Korean adults. *Tob Control* 2018;**27**:s74–7. doi:10.1136/tobaccocontrol-2018-054390
- 12 Czoli CD, White CM, Reid JL, *et al.* Awareness and interest in IQOS heated tobacco products among youth in Canada, England and the USA. *Tob Control* 2019;:1–7. doi:10.1136/tobaccocontrol-2018-054654
- 13 Kang H, Cho S II. Heated tobacco product use among Korean adolescents. *Tob Control* 2019;:1–3. doi:10.1136/tobaccocontrol-2019-054949
- 14 Nyman AL, Weaver SR, Popova L, *et al.* Awareness and use of heated tobacco products among US adults, 2016-2017. *Tob Control* 2018;**27**:s55–61. doi:10.1136/tobaccocontrol-2018-054323
- 15 Brose LS, Simonavicius E, Cheeseman H. Awareness and Use of 'Heat-not-burn' Tobacco Products in Great Britain. *Tob Regul Sci* 2018;**4**:44–50. doi:10.18001/trs.4.2.4
- 16 Thrasher JF, Abad-Vivero EN, Barrientos-Gutiérrez I, *et al.* Prevalence and Correlates of E-Cigarette Perceptions and Trial among Early Adolescents in Mexico. *J Adolesc Heal* 2016;**58**:358–65. doi:10.1016/j.jadohealth.2015.11.008
- 17 Morello P, Perez A, Peña L, *et al.* Prevalence and predictors of e-cigarette trial among adolescents in Argentina. *Tob Prev Cessat* 2016;**2**:1–8. doi:10.18332/tpc/66950
- 18 Zavala-Arciniega L, Reynales-Shigematsu LM, Lozano P, *et al.* Patterns of awareness and use of electronic cigarettes in Mexico, a middle-income country that bans them: Results from a 2016 national survey. *Prev Med (Baltim)* 2018;**116**:211–8. doi:10.1016/j.ypmed.2018.09.018
- 19 Vardavas CI, Filippidis FT, Agaku IT. Determinants and prevalence of e-cigarette use throughout the European union: A secondary analysis of 26 566 youth and adults from 27 countries. *Tob Control* 2015;**24**:442–8. doi:10.1136/tobaccocontrol-2013-051394
- 20 Barnoya J, Monzon JC, Briz P, *et al.* Compliance to the smoke-free law in Guatemala 5-years after implementation. *BMC Public Health* 2016;:1–5. doi:10.1186/s12889-016-2960-x
- 21 WHO. Guatemala Metropolitan Area-STEPS 2015 Fact sheet. 2015;:4–6. doi:10.7
- 22 Youth G, Survey T, Sheet F, *et al.* Guatemala 2015. 2015;:3–4.
- 23 Cruz-Jiménez L, Barrientos-Gutiérrez I, Coutiño-Escamilla L, *et al.* Adult Smokers' Awareness and Interest in Trying Heated Tobacco Products: Perspectives from Mexico, where HTPs and E-Cigarettes Are Banned. *Int J Environ Res Public Health* 2020;**17**. doi:10.3390/ijerph17072173
- 24 Pierce JP, Choi WS, Gilpin EA, *et al.* Validation of useceptibility as a predictor of which adolescents take up smoking in the United States. *Heal Psychol* 1996;**15**:355–61. doi:10.1037/0278-6133.15.5.355

- 1  
2  
3 25 Morello P, Pérez A, Braun SN, *et al.* Smoking susceptibility as a predictive measure of cigarette  
4 and e-cigarette use among early adolescents. *Salud Publica Mex* 2018;**60**:423–31.  
5 doi:10.21149/9193
- 6 26 Boyce W, Torsheim T, Currie C, *et al.* The family affluence scale as a measure of national wealth:  
7 Validation of an adolescent self-report measure. *Soc Indic Res* 2006;**78**:473–87.  
8 doi:10.1007/s11205-005-1607-6
- 9 27 Barrientos-Gutierrez I, Lozano P, Arillo-Santillan E, *et al.* “Technophilia”: A new risk factor for  
10 electronic cigarette use among early adolescents? *Addict Behav* 2019;**91**:193–200.  
11 doi:10.1016/j.addbeh.2018.09.004
- 12 28 Zavala-Arciniega L, Lozano P, Kollath-Cattano C, *et al.* E-cigarette use frequency and motivations  
13 among current users in middle school. *Drug Alcohol Depend* 2019;**204**:107585.  
14 doi:10.1016/j.drugalcdep.2019.107585
- 15 29 Barnoya J, Monzon D, Pinetta J, *et al.* FLAVOR CAPSULE CIGARETTES, ELECTRONIC  
16 CIGARETTES, AND HEAT NOT BURN PRODUCTS POINT OF SALE ADVERTISING IN  
17 GUATEMALA. In: *The Society for Research on Nicotine and Tobacco*. 2020. New Orleans, USA.
- 18 30 Soneji S, Barrington-Trimis JL, Wills TA, *et al.* Association between initial use of e-cigarettes and  
19 subsequent cigarette smoking among adolescents and young adults: a systematic review and meta-  
20 analysis. *JAMA Pediatr* 2017;**171**:788–97. doi:10.1001/jamapediatrics.2017.1488
- 21 31 Lozano P, Barrientos-Gutierrez I, Arillo-Santillan E, *et al.* A longitudinal study of electronic  
22 cigarette use and onset of conventional cigarette smoking and marijuana use among Mexican  
23 adolescents. *Drug Alcohol Depend* 2017;**180**:427–30. doi:10.1016/j.drugalcdep.2017.09.001
- 24 32 Levy DT, Warner KE, Michael Cummings K, *et al.* Examining the relationship of vaping to  
25 smoking initiation among US youth and young adults: A reality check. *Tob Control* 2019;**28**:629–  
26 35. doi:10.1136/tobaccocontrol-2018-054446
- 27 33 Crowther B, Jessor R, Jessor SL. Problem Behavior and Psychosocial Development: A  
28 Longitudinal Study of Youth. *Contemp Sociol* Published Online First: 1978. doi:10.2307/2065689
- 29 34 Instituto Nacioanl de Estadística Guatemala INE. XII Censo Nacional de Población y VII de  
30 Vivienda. Guatemala: 2019.
- 31 35 Cho YJ, Thrasher JF. Flavour capsule heat-sticks for heated tobacco products. *Tob Control*  
32 2019;**28**:E158–9. doi:10.1136/tobaccocontrol-2018-054472
- 33 36 Moodie C, Thrasher JF, Cho YJ, *et al.* Flavour capsule cigarettes continue to experience strong  
34 global growth. *Tob Control* 2018;**1**–2. doi:10.1136/tobaccocontrol-2018-054711
- 35  
36  
37  
38  
39  
40  
41  
42  
43  
44  
45  
46  
47  
48  
49  
50  
51  
52  
53  
54  
55  
56  
57  
58  
59  
60



Table 1. Characteristics of secondary school student participants in Guatemala, 2019 (N = 2870)

|                                            | N / Mean | % / SD |
|--------------------------------------------|----------|--------|
| <b>Dependent variables</b>                 |          |        |
| Aware of HTP                               | 1503     | 52.4   |
| Susceptible to HTP                         | 1500     | 52.4   |
| HTP use                                    |          |        |
| Never (unsusceptible) <sup>A</sup>         | 1993     | 69.6   |
| Never (susceptible) <sup>B</sup>           | 547      | 19.1   |
| Ever (not current)                         | 241      | 8.4    |
| Current                                    | 84       | 2.9    |
| <b>Socio-demographic characteristics</b>   |          |        |
| Sex                                        |          |        |
| Male                                       | 1438     | 50.3   |
| Female                                     | 1420     | 49.7   |
| Age                                        | 15.09    | 1.32   |
| Grade - USA categories                     |          |        |
| Basico (grades 8-9)                        | 1238     | 43.1   |
| Bachillerato (grades 10-12)                | 1632     | 56.9   |
| School performance                         |          |        |
| < 80%                                      | 523      | 18.8   |
| 80-89%                                     | 1321     | 47.6   |
| 90-100%                                    | 932      | 33.6   |
| Parents' highest educational attainment    |          |        |
| Secondary school or less                   | 49       | 1.7    |
| High school or technical school            | 537      | 18.7   |
| University or more                         | 2146     | 74.8   |
| Missing                                    | 138      | 4.8    |
| <b>Substance use variables</b>             |          |        |
| Ever use of any tobacco product            | 1675     | 58.4   |
| Of ever users, first tobacco product used: |          |        |
| Cigarette                                  | 456      | 43.2   |
| E-cigarette                                | 570      | 54.0   |
| HTP                                        | 16       | 1.5    |
| Other                                      | 13       | 1.2    |
| Cigarette smoker                           |          |        |
| Never (unsusceptible)*                     | 1261     | 44.0   |
| Never (susceptible)*                       | 754      | 26.3   |
| Ever (not current)                         | 601      | 21.0   |
| Current                                    | 250      | 8.7    |
| E-cigarette user                           |          |        |
| Never (unsusceptible)*                     | 713      | 25.0   |
| Never (susceptible)*                       | 545      | 19.1   |
| Ever (not current)                         | 808      | 28.3   |
| Current                                    | 791      | 27.7   |
| Of current smokers, which product used:    |          |        |
| Only cigarettes                            | 48       | 5.7    |
| Only e-cigarettes                          | 556      | 65.9   |
| Only HTPs                                  | 4        | 0.5    |
| More than one product                      | 236      | 30.0   |
| Of current HTP users:                      |          |        |
| Also smokes cigarettes                     | 44       | 52.4   |
| Also smokes e-cigarettes                   | 78       | 92.9   |
| Alcohol user                               |          |        |
| Never                                      | 683      | 23.9   |
| Ever (not current)                         | 935      | 32.7   |
| Current (no binge)                         | 676      | 23.7   |
| Current (binge) <sup>C</sup>               | 561      | 19.6   |
| Marijuana user                             |          |        |
| Never                                      | 2563     | 90.2   |
| Ever (not current)                         | 177      | 6.2    |
| Current                                    | 103      | 3.6    |
| Internet cigarette ad exposure             |          |        |
| Never                                      | 980      | 34.5   |
| Rarely/sometimes                           | 1543     | 54.3   |
| Mostly/always                              | 319      | 11.2   |
| Internet e-cigarette ad exposure           |          |        |
| Never                                      | 881      | 31.0   |
| Rarely/sometimes                           | 1471     | 51.8   |
| Mostly/always                              | 490      | 17.2   |
| Family member smokes cigarettes            | 1025     | 35.8   |

|                                         |      |      |
|-----------------------------------------|------|------|
| Family member uses e-cigarettes         | 599  | 21.0 |
| Family member uses HTP                  | 395  | 13.8 |
| Friend smokes cigarettes                | 1551 | 54.1 |
| Friend smokes e-cigarettes              | 1817 | 63.6 |
| Friend uses HTP                         | 423  | 14.8 |
| <b>Constructed scales (score range)</b> |      |      |
| Sensation seeking (1-4)                 | 2.77 | 0.7  |
| Technophilia (0-7)                      | 5.73 | 0.9  |
| Family affluent scale (0-9)             | 7.27 | 1.57 |

<sup>A</sup> Unsusceptible is defined as answering definitely no to both "Do you think you will smoke in the next 12 months?" and "If one of your best friends offered you a cigarette, would you smoke it?"

<sup>B</sup> Susceptible is defined as answering probably no, probably yes, or definitely yes to either "Do you think you will smoke in the next 12 months?" or "If one of your best friends offered you a cigarette, would you smoke it?"

<sup>C</sup> Binge drinking is defined as consuming 4 or more drinks on one occasion in the last month

For peer review only

Table 2. Crude and adjusted odds ratios for awareness and susceptibility of HTP among Guatemalan youth<sup>A</sup>

|                                                 | HTP awareness<br>N = 1503 (52.4%) |           |              |                  |              | HTP susceptible<br>N = 1500 (52.4%) |           |                 |                  |                |
|-------------------------------------------------|-----------------------------------|-----------|--------------|------------------|--------------|-------------------------------------|-----------|-----------------|------------------|----------------|
|                                                 | % / mean                          | OR        | CI 95%       | AOR <sup>B</sup> | CI 95%       | % / mean                            | OR        | CI 95%          | AOR <sup>B</sup> | CI 95%         |
| <b><i>Socio-demographic characteristics</i></b> |                                   |           |              |                  |              |                                     |           |                 |                  |                |
| <b>Sex</b>                                      |                                   |           |              |                  |              |                                     |           |                 |                  |                |
| Female                                          | 54.94                             | Reference |              | Reference        |              | 52.33                               | Reference |                 | Reference        |                |
| Male                                            | 49.72                             | 0.86      | (0.74, 1.01) | 0.81*            | (0.68, 0.97) | 52.40                               | 0.98      | (0.84, 1.14)    | 0.83             | (0.66, 1.04)   |
| <b>Age</b>                                      |                                   |           |              |                  |              |                                     |           |                 |                  |                |
| Age                                             | 15.29                             | 1.25      | (1.17, 1.32) | 1.05             | (0.93, 1.18) | 15.26                               | 1.29      | (1.22, 1.37)    | 0.93             | (0.79, 1.08)   |
| <b>Grade - USA categories</b>                   |                                   |           |              |                  |              |                                     |           |                 |                  |                |
| Basico (grades 8-9)                             | 43.77                             | Reference |              | Reference        |              | 44.04                               | Reference |                 | Reference        |                |
| Bachillerato (grades 10-12)                     | 58.95                             | 1.73      | (1.48, 2.02) | 1.00             | (0.74, 1.35) | 58.64                               | 1.92      | (1.64, 2.24)    | 1.08             | (0.73, 1.59)   |
| <b>School performance</b>                       |                                   |           |              |                  |              |                                     |           |                 |                  |                |
| < 80%                                           | 53.26                             | Reference |              | Reference        |              | 60.92                               | Reference |                 | Reference        |                |
| 80-89%                                          | 54.62                             | 1.02      | (0.82, 1.27) | 1.30*            | (1.01, 1.67) | 55.12                               | 0.75      | (0.61, 0.93)    | 0.88             | (0.64, 1.20)   |
| 90-100%                                         | 48.61                             | 0.72      | (0.57, 0.92) | 1.13             | (0.85, 1.51) | 44.58                               | 0.49      | (0.39, 0.62)    | 0.83             | (0.58, 1.19)   |
| <b>Parents' highest educational attainment</b>  |                                   |           |              |                  |              |                                     |           |                 |                  |                |
| Secondary school or less                        | 53.06                             | Reference |              | Reference        |              | 46.94                               | Reference |                 | Reference        |                |
| High school or technical school                 | 52.33                             | 1.06      | (0.55, 1.83) | 0.75             | (0.37, 1.51) | 52.33                               | 1.23      | (0.69, 2.22)    | 1.07             | (0.43, 2.67)   |
| University or more                              | 52.87                             | 1.06      | (0.60, 1.90) | 0.80             | (0.41, 1.59) | 53.29                               | 1.27      | (0.72, 2.24)    | 1.34             | (0.55, 3.27)   |
| Missing                                         | 45.26                             | 0.71      | (0.37, 1.40) | 0.91             | (0.40, 2.05) | 39.71                               | 0.75      | (0.39, 1.46)    | 1.11             | (0.39, 3.16)   |
| <b><i>Substance use variables</i></b>           |                                   |           |              |                  |              |                                     |           |                 |                  |                |
| <b>Cigarette smoker</b>                         |                                   |           |              |                  |              |                                     |           |                 |                  |                |
| Never (unsusceptible)                           | 41.59                             | Reference |              | Reference        |              | 17.00                               | Reference |                 | Reference        |                |
| Never (susceptible)                             | 51.39                             | 1.54      | (1.28, 1.86) | 0.88             | (0.69, 1.13) | 75.90                               | 15.68     | (12.52, 19.65)  | 6.18*            | (4.72, 8.07)   |
| Ever (not current)                              | 65.06                             | 2.69      | (2.19, 3.31) | 1.19             | (0.89, 1.59) | 81.36                               | 22.69     | (17.53, 29.37)  | 6.93*            | (5.02, 9.57)   |
| Current                                         | 79.60                             | 5.6       | (4.01, 7.81) | 1.58             | (1.00, 2.49) | 90.80                               | 51.58     | (32.64, 81.51)  | 10.53*           | (5.92, 18.71)  |
| <b>E-cigarette user</b>                         |                                   |           |              |                  |              |                                     |           |                 |                  |                |
| Never (unsusceptible)                           | 33.43                             | Reference |              | Reference        |              | 4.64                                | Reference |                 | Reference        |                |
| Never (susceptible)                             | 43.12                             | 1.6       | (1.27, 2.03) | 1.28             | (0.95, 1.73) | 63.42                               | 36.41     | (24.52, 54.07)  | 12.18*           | (7.79, 19.03)  |
| Ever (not current)                              | 55.94                             | 2.51      | (2.03, 3.09) | 1.65*            | (1.23, 2.21) | 61.34                               | 38.66     | (26.34, 57.75)  | 11.08*           | (7.07, 17.37)  |
| Current                                         | 72.41                             | 4.67      | (3.73, 5.86) | 2.10*            | (1.47, 2.99) | 78.73                               | 124.45    | (82.40, 187.94) | 21.87*           | (13.02, 36.71) |
| <b>Alcohol</b>                                  |                                   |           |              |                  |              |                                     |           |                 |                  |                |
| Never                                           | 35.34                             | Reference |              | Reference        |              | 20.56                               | Reference |                 | Reference        |                |
| Ever (not current)                              | 46.25                             | 1.65      | (1.34, 2.03) | 1.25             | (0.97, 1.60) | 52.41                               | 4.18      | (3.33, 5.26)    | 1.73*            | (1.25, 2.41)   |
| Current (no binge)                              | 57.84                             | 2.44      | (1.96, 3.05) | 1.28             | (0.95, 1.71) | 65.68                               | 8.78      | (6.81, 11.32)   | 1.49*            | (1.03, 2.17)   |
| Current (binge)                                 | 76.83                             | 5.27      | (4.07, 6.82) | 1.84*            | (1.28, 2.65) | 75.36                               | 17.99     | (13.41, 24.15)  | 1.65*            | (1.04, 2.60)   |
| <b>Marijuana</b>                                |                                   |           |              |                  |              |                                     |           |                 |                  |                |
| Never                                           | 49.43                             | Reference |              | Reference        |              | 48.40                               | Reference |                 | Reference        |                |
| Ever (not current)                              | 77.97                             | 3.49      | (2.42, 5.04) | 1.50             | (0.97, 2.32) | 85.88                               | 6.79      | (4.40, 10.46)   | 1.61             | (0.94, 2.75)   |
| Current                                         | 81.55                             | 4.03      | (2.42, 6.71) | 1.48             | (0.82, 2.67) | 93.20                               | 16.78     | (7.72, 36.49)   | 3.49*            | (1.40, 8.72)   |
| <b>Internet cigarette ad exposure</b>           |                                   |           |              |                  |              |                                     |           |                 |                  |                |
| Never                                           | 44.74                             | Reference |              | Reference        |              | 38.78                               | Reference |                 | Reference        |                |
| Rarely/sometimes                                | 55.19                             | 1.66      | (1.40, 1.96) | 1.07             | (0.86, 1.34) | 58.64                               | 2.22      | (1.88, 2.62)    | 1.40             | (1.06, 1.84)   |
| Mostly/always                                   | 63.01                             | 2.44      | (1.87, 3.19) | 1.08             | (0.75, 1.57) | 64.78                               | 2.87      | (2.20, 3.73)    | 1.52             | (0.97, 2.40)   |
| <b>Internet e-cigarette ad exposure</b>         |                                   |           |              |                  |              |                                     |           |                 |                  |                |
| Never                                           | 39.70                             | Reference |              | Reference        |              | 35.38                               | Reference |                 | Reference        |                |
| Rarely/sometimes                                | 55.47                             | 2         | (1.68, 2.38) | 1.39*            | (1.10, 1.75) | 57.11                               | 2.43      | (2.05, 2.89)    | 1.05*            | (0.78, 1.41)   |
| Mostly/always                                   | 66.12                             | 3.33      | (2.62, 4.22) | 1.76*            | (1.26, 2.46) | 69.12                               | 4.05      | (3.19, 5.13)    | 0.86             | (0.57, 1.30)   |
| <b>Family member smokes cigarettes</b>          |                                   |           |              |                  |              |                                     |           |                 |                  |                |
| No                                              | 45.78                             | Reference |              | Reference        |              | 46.13                               | Reference |                 | Reference        |                |
| Yes                                             | 64.36                             | 2.14      | (1.82, 2.51) | 1.31*            | (1.07, 1.60) | 63.80                               | 2.08      | (1.78, 2.44)    | 1.17             | (0.91, 1.50)   |
| <b>Family member smokes e-cigarettes</b>        |                                   |           |              |                  |              |                                     |           |                 |                  |                |
| No                                              | 47.96                             | Reference |              | Reference        |              | 48.76                               | Reference |                 | Reference        |                |
| Yes                                             | 69.28                             | 2.17      | (1.78, 2.64) | 1.25             | (0.98, 1.59) | 66.39                               | 2.25      | (1.85, 2.73)    | 1.08             | (0.81, 1.45)   |
| <b>Family member uses HTP</b>                   |                                   |           |              |                  |              |                                     |           |                 |                  |                |

|    |                                         |       |           |              |           |              |           |      |              |                    |  |
|----|-----------------------------------------|-------|-----------|--------------|-----------|--------------|-----------|------|--------------|--------------------|--|
| 1  | No                                      | 49.98 | Reference |              | Reference | 51.18        | Reference |      | Reference    |                    |  |
| 2  | Yes                                     | 67.85 | 2.08      | (1.65, 2.62) | 1.60*     | (1.22, 2.09) | 60.51     | 1.48 | (1.19, 1.84) | 0.98 (0.71, 1.36)  |  |
| 3  | Friend smokes cigarettes                |       |           |              |           |              |           |      |              |                    |  |
| 4  | No                                      | 43.72 | Reference |              | Reference | 40.50        | Reference |      | Reference    |                    |  |
| 5  | Yes                                     | 59.81 | 1.89      | (1.62, 2.20) | 1.03      | (0.83, 1.29) | 62.56     | 2.5  | (2.14, 2.91) | 0.91 (0.70, 1.19)  |  |
| 6  | Friend uses e-cigarettes                |       |           |              |           |              |           |      |              |                    |  |
| 7  | No                                      | 39.71 | Reference |              | Reference | 38.98        | Reference |      | Reference    |                    |  |
| 8  | Yes                                     | 59.80 | 1.96      | (1.67, 2.31) | 0.72*     | (0.57, 0.91) | 60.17     | 2.75 | (2.33, 3.25) | 0.70* (0.51, 0.95) |  |
| 9  | Friend uses HTP                         |       |           |              |           |              |           |      |              |                    |  |
| 10 | No                                      | 48.05 | Reference |              | Reference | 49.90        | Reference |      | Reference    |                    |  |
| 11 | Yes                                     | 77.73 | 4.19      | (3.27, 5.38) | 4.15*     | (3.11, 5.55) | 66.43     | 1.98 | (1.59, 2.47) | 1.83* (1.31, 2.57) |  |
| 12 | <b>Constructed scales (score range)</b> |       |           |              |           |              |           |      |              |                    |  |
| 13 | Sensation seeking (1-4)                 | 2.87  | 1.61      | (1.44, 1.80) | 1.08      | (0.95, 1.24) | 2.97      | 2.47 | (2.20, 2.78) | 1.41* (1.19, 1.68) |  |
| 14 | Technophilia (0-7)                      | 5.85  | 1.29      | (1.19, 1.41) | 1.07      | (0.97, 1.19) | 5.82      | 1.29 | (1.18, 1.40) | 1.04 (0.91, 1.20)  |  |
| 15 | Family affluent scale (0-9)             | 7.46  | 1.15      | (1.09, 1.21) | 1.10*     | (1.04, 1.17) | 7.29      | 1.04 | (0.99, 1.09) | 0.94 (0.88, 1.02)  |  |

12 <sup>A</sup> All models include a random intercept for each participant to account for school-clustering

13 <sup>B</sup> Adjusted models are adjusted for all independent variables

14 \* Significant at  $\alpha = 0.05$

17 Table 3. Crude and adjusted odds ratios for ever and current HTP use among Guatemalan youth<sup>A</sup>

|                                          |                                 | Ever HTP use (not current)<br>N = 241 (8.6%) |           |                 |                  |               | Current HTP use<br>N = 84 (2.9%) |           |                 |                  |                 |
|------------------------------------------|---------------------------------|----------------------------------------------|-----------|-----------------|------------------|---------------|----------------------------------|-----------|-----------------|------------------|-----------------|
|                                          |                                 | % / mean                                     | OR        | CI 95%          | AOR <sup>B</sup> | CI 95%        | % / mean                         | OR        | CI 95%          | AOR <sup>B</sup> | CI 95%          |
| <b>Socio-demographic characteristics</b> |                                 |                                              |           |                 |                  |               |                                  |           |                 |                  |                 |
| Sex                                      |                                 |                                              |           |                 |                  |               |                                  |           |                 |                  |                 |
| 22                                       | Female                          | 7.56                                         | Reference |                 | Reference        | 2.63          | Reference                        |           | Reference       |                  |                 |
| 23                                       | Male                            | 9.75                                         | 1.4       | (1.07, 1.84)    | 1.22             | (0.86, 1.72)  | 3.42                             | 1.31      | (0.84, 2.06)    | 1.1              | (0.55, 2.20)    |
| 24                                       | Age                             | 15.87                                        | 1.72      | (1.53, 1.94)    | 1.2              | (0.97, 1.50)  | 15.65                            | 1.49      | (1.25, 1.80)    | 0.96             | (0.62, 1.50)    |
| Grade - USA categories                   |                                 |                                              |           |                 |                  |               |                                  |           |                 |                  |                 |
| 25                                       | Basico (grades 8-9)             | 3.77                                         | Reference |                 | Reference        | 1.43          | Reference                        |           | Reference       |                  |                 |
| 26                                       | Bachillerato (grades 10-12)     | 12.44                                        | 3.45      | (2.47, 4.82)    | 0.92             | (0.49, 1.71)  | 4.45                             | 3.22      | (1.88, 5.53)    | 2.69             | (0.72, 10.06)   |
| School performance                       |                                 |                                              |           |                 |                  |               |                                  |           |                 |                  |                 |
| 27                                       | < 80%                           | 11.78                                        | Reference |                 | Reference        | 4.54          | Reference                        |           | Reference       |                  |                 |
| 28                                       | 80-89%                          | 10.07                                        | 0.71      | (0.50, 1.01)    | 1.04             | (0.67, 1.63)  | 3.36                             | 0.73      | (0.43, 1.25)    | 0.89             | (0.38, 2.08)    |
| 29                                       | 90-100%                         | 5.24                                         | 0.29      | (0.19, 0.45)    | 0.69             | (0.38, 1.25)  | 1.81                             | 0.39      | (0.20, 0.75)    | 1.15             | (0.43, 3.11)    |
| Parents' highest educational attainment  |                                 |                                              |           |                 |                  |               |                                  |           |                 |                  |                 |
| 30                                       | Secondary school or less        | 16.67                                        | Reference |                 | Reference        | 2.44          | Reference                        |           | Reference       |                  |                 |
| 31                                       | High school or technical school | 10.90                                        | 0.63      | (0.28, 1.43)    | 0.5              | (0.18, 1.69)  | 2.92                             | 1.2       | (0.15, 9.41)    | 0.26             | (0.02, 3.14)    |
| 32                                       | University or more              | 8.12                                         | 0.48      | (0.22, 1.04)    | 0.36             | (0.12, 1.07)  | 3.29                             | 1.36      | (0.18, 10.08)   | 0.2              | (0.02, 2.29)    |
| 33                                       | Missing                         | 5.15                                         | 0.27      | (0.09, 0.80)    | 0.28             | (0.06, 1.37)  | 0.77                             | 0.31      | (0.02, 5.09)    | 0                | NA              |
| <b>Substance use variables</b>           |                                 |                                              |           |                 |                  |               |                                  |           |                 |                  |                 |
| Cigarette smoker <sup>C</sup>            |                                 |                                              |           |                 |                  |               |                                  |           |                 |                  |                 |
| 35                                       | Never (unsusceptible)           | 1.75                                         | Reference |                 | Reference        |               |                                  |           |                 |                  |                 |
| 36                                       | Never (susceptible)             | 4.59                                         | 2.76      | (1.60, 4.76)    | 1.34             | (0.69, 2.61)  |                                  |           |                 |                  |                 |
| 37                                       | Ever (not current)              | 18.37                                        | 12.7      | (7.92, 20.36)   | 3.73*            | (2.03, 6.82)  | 1.59                             | Reference |                 | Reference        |                 |
| 38                                       | Current                         | 37.98                                        | 34.93     | (21.01, 58.08)  | 6.63*            | (3.20, 13.74) | 24.56                            | 20.15     | (12.59, 32.26)  | 6.14*            | (2.71, 13.93)   |
| E-cigarette user <sup>C</sup>            |                                 |                                              |           |                 |                  |               |                                  |           |                 |                  |                 |
| 39                                       | Never (unsusceptible)           | 0.42                                         | Reference |                 | Reference        |               |                                  |           |                 |                  |                 |
| 40                                       | Never (susceptible)             | 0.55                                         | 1.31      | (0.26, 6.49)    | 0.71             | (0.13, 3.92)  |                                  |           |                 |                  |                 |
| 41                                       | Ever (not current)              | 11.19                                        | 29.66     | (9.37, 93.89)   | 9.31*            | (2.61, 33.23) | 0.25                             | Reference |                 | Reference        |                 |
| 42                                       | Current                         | 20.00                                        | 59.31     | (18.84, 186.69) | 10.4*            | (2.75, 39.17) | 11.73                            | 61.32     | (24.38, 154.20) | 84.9*            | (24.19, 298.22) |
| Alcohol <sup>D</sup>                     |                                 |                                              |           |                 |                  |               |                                  |           |                 |                  |                 |
| 43                                       | Never                           | 1.47                                         | Reference |                 | Reference        |               |                                  |           |                 |                  |                 |

|    |                                         |       |           |                |           |               |       |           |                |           |                |
|----|-----------------------------------------|-------|-----------|----------------|-----------|---------------|-------|-----------|----------------|-----------|----------------|
| 1  | Ever (not current)                      | 4.22  | 2.96      | (1.47, 5.97)   | 1.14      | (0.50, 2.60)  |       |           |                |           |                |
| 2  | Current (no binge)                      | 8.18  | 5.99      | (3.02, 11.87)  | 1.19      | (0.52, 2.75)  | 1.73  | Reference |                | Reference |                |
| 3  | Current (binge)                         | 26.25 | 23.92     | (12.43, 46.03) | 2.53*     | (1.08, 5.95)  | 10.12 | 6.39      | (3.89, 10.50)  | 0.59      | (0.27, 1.30)   |
| 4  | Marijuana                               |       |           |                |           |               |       |           |                |           |                |
| 5  | Never                                   | 6.07  | Reference |                | Reference |               | 1.74  | Reference |                | Reference |                |
| 6  | Ever (not current)                      | 29.03 | 6.18      | (4.20, 9.09)   | 1.37      | (0.84, 2.22)  | 16.67 | 11.27     | (6.50, 19.54)  | 2.34      | (0.96, 5.68)   |
| 7  | Current                                 | 45.98 | 12.57     | (7.93, 19.93)  | 2.29*     | (1.27, 4.13)  | 25.40 | 19.19     | (10.07, 36.54) | 2.27      | (0.72, 7.10)   |
| 8  | Internet cigarette ad exposure          |       |           |                |           |               |       |           |                |           |                |
| 9  | Never                                   | 6.54  | Reference |                | Reference |               | 1.85  | Reference |                | Reference |                |
| 10 | Rarely/sometimes                        | 8.88  | 1.46      | (1.07, 2.00)   | 1.13      | (0.74, 1.75)  | 3.12  | 1.71      | (0.97, 3.01)   | 1.32      | (0.52, 3.36)   |
| 11 | Mostly/always                           | 14.33 | 2.56      | (1.69, 3.88)   | 1.5       | (0.81, 2.77)  | 6.88  | 3.91      | (2.01, 7.64)   | 3.12      | (0.99, 9.90)   |
| 12 | Internet e-cigarette ad exposure        |       |           |                |           |               |       |           |                |           |                |
| 13 | Never                                   | 5.45  | Reference |                | Reference |               | 2.04  | Reference |                | Reference |                |
| 14 | Rarely/sometimes                        | 8.09  | 1.54      | (1.08, 2.18)   | 0.67      | (0.41, 1.09)  | 2.73  | 1.35      | (0.75, 2.41)   | 0.33*     | (0.12, 0.91)   |
| 15 | Mostly/always                           | 16.41 | 3.61      | (2.45, 5.31)   | 0.98      | (0.54, 1.77)  | 6.52  | 3.35      | (1.80, 6.22)   | 0.32      | (0.10, 1.01)   |
| 16 | Family member smokes cigarettes         |       |           |                |           |               |       |           |                |           |                |
| 17 | No                                      | 5.28  | Reference |                | Reference |               | 2.07  | Reference |                | Reference |                |
| 18 | Yes                                     | 14.88 | 3.1       | (2.36, 4.07)   | 1.7*      | (1.19, 2.45)  | 5.01  | 2.49      | (1.60, 3.90)   | 3.25*     | (1.51, 7.02)   |
| 19 | Family member smokes e-cigarettes       |       |           |                |           |               |       |           |                |           |                |
| 20 | No                                      | 6.58  | Reference |                | Reference |               | 2.42  | Reference |                | Reference |                |
| 21 | Yes                                     | 16.49 | 2.64      | (1.98, 3.51)   | 1.37      | (0.94, 2.01)  | 5.74  | 2.46      | (1.54, 3.92)   | 0.64      | (0.30, 1.37)   |
| 22 | Family member uses HTP                  |       |           |                |           |               |       |           |                |           |                |
| 23 | No                                      | 8.09  | Reference |                | Reference |               | 2.86  | Reference |                | Reference |                |
| 24 | Yes                                     | 12.40 | 1.58      | (1.13, 2.23)   | 0.9       | (0.58, 1.42)  | 4.60  | 1.63      | (0.93, 2.86)   | 1.15      | (0.48, 2.76)   |
| 25 | Friend smokes cigarettes                |       |           |                |           |               |       |           |                |           |                |
| 26 | No                                      | 4.77  | Reference |                | Reference |               | 1.12  | Reference |                | Reference |                |
| 27 | Yes                                     | 12.07 | 2.71      | (2.01, 3.66)   | 0.77      | 0.50, 1.18)   | 4.89  | 4.54      | (2.54, 8.12)   | 0.74      | (0.30, 1.83)   |
| 28 | Friend uses e-cigarettes                |       |           |                |           |               |       |           |                |           |                |
| 29 | No                                      | 3.97  | Reference |                | Reference |               | 0.60  | Reference |                | Reference |                |
| 30 | Yes                                     | 10.22 | 2.93      | (2.06, 4.18)   | 0.51*     | (0.30, 0.86)  | 4.63  | 8.04      | (3.49, 18.53)  | 0.62      | (0.19, 2.01)   |
| 31 | Friend uses HTP                         |       |           |                |           |               |       |           |                |           |                |
| 32 | No                                      | 6.72  | Reference |                | Reference |               | 1.19  | Reference |                | Reference |                |
| 33 | Yes                                     | 21.14 | 3.98      | (2.94, 5.39)   | 7.28*     | (4.64, 11.43) | 15.65 | 15.46     | (9.58, 24.94)  | 44.72*    | (20.08, 99.58) |
| 34 | <b>Constructed scales (score range)</b> |       |           |                |           |               |       |           |                |           |                |
| 35 | Sensation seeking (1-4)                 | 3.10  | 2.46      | (1.97, 3.07)   | 1.27      | (0.96, 1.68)  | 3.25  | 3.75      | (2.51, 5.60)   | 1.44      | (0.79, 2.63)   |
| 36 | Technophilia (0-7)                      | 5.96  | 1.4       | (1.18, 1.67)   | 1.12      | (0.89, 1.40)  | 6.11  | 1.91      | (1.39, 2.65)   | 1.54      | (0.99, 2.41)   |
| 37 | Family affluent scale (0-9)             | 7.64  | 1.18      | (1.07, 1.30)   | 1.15*     | (1.02, 1.31)  | 7.63  | 1.21      | (1.03, 1.42)   | 1.16      | (0.90, 1.48)   |

<sup>A</sup> All models include a random intercept for each participant to account for school-clustering

<sup>B</sup> Adjusted models are adjusted for all independent variables

<sup>C</sup> Due to low counts, for current use models, cigarette and e-cigarette use was combined to current user versus non-current user

<sup>D</sup> Due to low counts, alcohol use was combined to non-binge versus binge in last month

\* Significant at  $\alpha = 0.05$

STROBE Statement—Checklist of items that should be included in reports of *cross-sectional studies*

|                              | Item No | Recommendation                                                                                                                                                                                               | Page No |
|------------------------------|---------|--------------------------------------------------------------------------------------------------------------------------------------------------------------------------------------------------------------|---------|
| <b>Title and abstract</b>    | 1       | (a) Indicate the study's design with a commonly used term in the title or the abstract                                                                                                                       | 1       |
|                              |         | (b) Provide in the abstract an informative and balanced summary of what was done and what was found                                                                                                          | 2       |
| <b>Introduction</b>          |         |                                                                                                                                                                                                              |         |
| Background/rationale         | 2       | Explain the scientific background and rationale for the investigation being reported                                                                                                                         | 4       |
| Objectives                   | 3       | State specific objectives, including any prespecified hypotheses                                                                                                                                             | 6       |
| <b>Methods</b>               |         |                                                                                                                                                                                                              |         |
| Study design                 | 4       | Present key elements of study design early in the paper                                                                                                                                                      | 6       |
| Setting                      | 5       | Describe the setting, locations, and relevant dates, including periods of recruitment, exposure, follow-up, and data collection                                                                              | 6       |
| Participants                 | 6       | (a) Give the eligibility criteria, and the sources and methods of selection of participants                                                                                                                  | 6       |
| Variables                    | 7       | Clearly define all outcomes, exposures, predictors, potential confounders, and effect modifiers. Give diagnostic criteria, if applicable                                                                     | 7       |
| Data sources/<br>measurement | 8*      | For each variable of interest, give sources of data and details of methods of assessment (measurement). Describe comparability of assessment methods if there is more than one group                         | 9       |
| Bias                         | 9       | Describe any efforts to address potential sources of bias                                                                                                                                                    | NA      |
| Study size                   | 10      | Explain how the study size was arrived at                                                                                                                                                                    | NA      |
| Quantitative variables       | 11      | Explain how quantitative variables were handled in the analyses. If applicable, describe which groupings were chosen and why                                                                                 | 7       |
| Statistical methods          | 12      | (a) Describe all statistical methods, including those used to control for confounding                                                                                                                        | 9       |
|                              |         | (b) Describe any methods used to examine subgroups and interactions                                                                                                                                          | 9       |
|                              |         | (c) Explain how missing data were addressed                                                                                                                                                                  | 9       |
|                              |         | (d) If applicable, describe analytical methods taking account of sampling strategy                                                                                                                           | NA      |
|                              |         | (e) Describe any sensitivity analyses                                                                                                                                                                        | NA      |
| <b>Results</b>               |         |                                                                                                                                                                                                              |         |
| Participants                 | 13*     | (a) Report numbers of individuals at each stage of study—eg numbers potentially eligible, examined for eligibility, confirmed eligible, included in the study, completing follow-up, and analysed            | 9       |
|                              |         | (b) Give reasons for non-participation at each stage                                                                                                                                                         | 9       |
|                              |         | (c) Consider use of a flow diagram                                                                                                                                                                           | NA      |
| Descriptive data             | 14*     | (a) Give characteristics of study participants (eg demographic, clinical, social) and information on exposures and potential confounders                                                                     | 10      |
|                              |         | (b) Indicate number of participants with missing data for each variable of interest                                                                                                                          | 10      |
| Outcome data                 | 15*     | Report numbers of outcome events or summary measures                                                                                                                                                         | 10      |
| Main results                 | 16      | (a) Give unadjusted estimates and, if applicable, confounder-adjusted estimates and their precision (eg, 95% confidence interval). Make clear which confounders were adjusted for and why they were included | 10      |

|                          |    |                                                                                                                                                                            |    |
|--------------------------|----|----------------------------------------------------------------------------------------------------------------------------------------------------------------------------|----|
|                          |    | (b) Report category boundaries when continuous variables were categorized                                                                                                  | 10 |
|                          |    | (c) If relevant, consider translating estimates of relative risk into absolute risk for a meaningful time period                                                           | NA |
| Other analyses           | 17 | Report other analyses done—eg analyses of subgroups and interactions, and sensitivity analyses                                                                             | NA |
| <b>Discussion</b>        |    |                                                                                                                                                                            |    |
| Key results              | 18 | Summarise key results with reference to study objectives                                                                                                                   | 12 |
| Limitations              | 19 | Discuss limitations of the study, taking into account sources of potential bias or imprecision. Discuss both direction and magnitude of any potential bias                 | 14 |
| Interpretation           | 20 | Give a cautious overall interpretation of results considering objectives, limitations, multiplicity of analyses, results from similar studies, and other relevant evidence | 14 |
| Generalisability         | 21 | Discuss the generalisability (external validity) of the study results                                                                                                      | 14 |
| <b>Other information</b> |    |                                                                                                                                                                            |    |
| Funding                  | 22 | Give the source of funding and the role of the funders for the present study and, if applicable, for the original study on which the present article is based              | 16 |

\*Give information separately for exposed and unexposed groups.

**Note:** An Explanation and Elaboration article discusses each checklist item and gives methodological background and published examples of transparent reporting. The STROBE checklist is best used in conjunction with this article (freely available on the Web sites of PLoS Medicine at <http://www.plosmedicine.org/>, Annals of Internal Medicine at <http://www.annals.org/>, and Epidemiology at <http://www.epidem.com/>). Information on the STROBE Initiative is available at [www.strobe-statement.org](http://www.strobe-statement.org).

# BMJ Open

## A cross-sectional study on the awareness, susceptibility, and use of heated tobacco products among adolescents in Guatemala City, Guatemala

|                                 |                                                                                                                                                                                                                                                                                                                                                                                                                                                                                                                                                                                                                                                                                                                                                                                                                           |
|---------------------------------|---------------------------------------------------------------------------------------------------------------------------------------------------------------------------------------------------------------------------------------------------------------------------------------------------------------------------------------------------------------------------------------------------------------------------------------------------------------------------------------------------------------------------------------------------------------------------------------------------------------------------------------------------------------------------------------------------------------------------------------------------------------------------------------------------------------------------|
| Journal:                        | <i>BMJ Open</i>                                                                                                                                                                                                                                                                                                                                                                                                                                                                                                                                                                                                                                                                                                                                                                                                           |
| Manuscript ID                   | bmjopen-2020-039792.R1                                                                                                                                                                                                                                                                                                                                                                                                                                                                                                                                                                                                                                                                                                                                                                                                    |
| Article Type:                   | Original research                                                                                                                                                                                                                                                                                                                                                                                                                                                                                                                                                                                                                                                                                                                                                                                                         |
| Date Submitted by the Author:   | 13-Aug-2020                                                                                                                                                                                                                                                                                                                                                                                                                                                                                                                                                                                                                                                                                                                                                                                                               |
| Complete List of Authors:       | Gottschlich, Anna; The University of British Columbia, School of Population and Public Health; Universidad Rafael Landivar, Instituto de Investigación y Estudios Superiores en Ciencias de la Salud Mus, Sophia; Universidad Rafael Landivar, Instituto de Investigación y Estudios Superiores en Ciencias de la Salud Monzon, Jose Carlos; Universidad Rafael Landivar, Instituto de Investigación y Estudios Superiores en Ciencias de la Salud Thrasher, Jim; University of South Carolina, Department of Health Promotion, Education & Behavior; National Institute of Public Health, Center for Population Health Research Barnoya, Joaquin; Unidad de Cirugia Cardiovascular, Departamento de Investigacion; Universidad Rafael Landivar, Instituto de Investigación y Estudios Superiores en Ciencias de la Salud |
| <b>Primary Subject Heading</b>: | Smoking and tobacco                                                                                                                                                                                                                                                                                                                                                                                                                                                                                                                                                                                                                                                                                                                                                                                                       |
| Secondary Subject Heading:      | Global health, Public health, Smoking and tobacco                                                                                                                                                                                                                                                                                                                                                                                                                                                                                                                                                                                                                                                                                                                                                                         |
| Keywords:                       | EPIDEMIOLOGY, PUBLIC HEALTH, Community child health < PAEDIATRICS                                                                                                                                                                                                                                                                                                                                                                                                                                                                                                                                                                                                                                                                                                                                                         |
|                                 |                                                                                                                                                                                                                                                                                                                                                                                                                                                                                                                                                                                                                                                                                                                                                                                                                           |

SCHOLARONE™  
Manuscripts





I, the Submitting Author has the right to grant and does grant on behalf of all authors of the Work (as defined in the below author licence), an exclusive licence and/or a non-exclusive licence for contributions from authors who are: i) UK Crown employees; ii) where BMJ has agreed a CC-BY licence shall apply, and/or iii) in accordance with the terms applicable for US Federal Government officers or employees acting as part of their official duties; on a worldwide, perpetual, irrevocable, royalty-free basis to BMJ Publishing Group Ltd ("BMJ") its licensees and where the relevant Journal is co-owned by BMJ to the co-owners of the Journal, to publish the Work in this journal and any other BMJ products and to exploit all rights, as set out in our [licence](#).

The Submitting Author accepts and understands that any supply made under these terms is made by BMJ to the Submitting Author unless you are acting as an employee on behalf of your employer or a postgraduate student of an affiliated institution which is paying any applicable article publishing charge ("APC") for Open Access articles. Where the Submitting Author wishes to make the Work available on an Open Access basis (and intends to pay the relevant APC), the terms of reuse of such Open Access shall be governed by a Creative Commons licence – details of these licences and which [Creative Commons](#) licence will apply to this Work are set out in our licence referred to above.

Other than as permitted in any relevant BMJ Author's Self Archiving Policies, I confirm this Work has not been accepted for publication elsewhere, is not being considered for publication elsewhere and does not duplicate material already published. I confirm all authors consent to publication of this Work and authorise the granting of this licence.

1  
2  
3 A cross-sectional study on the awareness, susceptibility, and use of heated  
4 tobacco products among adolescents in Guatemala City, Guatemala  
5  
6  
7

8 Anna Gottschlich<sup>1,2</sup>, Sophia Mus<sup>1</sup>, Jose Carlos Monzon<sup>1</sup>, James F. Thrasher<sup>3,4</sup>, Joaquin  
9 Barnoya<sup>1,5</sup>  
10

- 11 1. Instituto de Investigación y Estudios Superiores en Ciencias de la Salud, Universidad Rafael Landivar,  
12 Guatemala  
13 2. School of Population and Public Health, University of British Columbia, Vancouver, British Columbia,  
14 Canada  
15 3. Department of Health Promotion, Education & Behavior, Arnold School of Public Health, University of  
16 South Carolina, Columbia, South Carolina, USA  
17 4. Center for Population Health Research, National Institute of Public Health, Cuernavaca, Mexico  
18 5. Unidad de Cirugía Cardiovascular de Guatemala, Guatemala City, Guatemala  
19  
20  
21  
22  
23  
24  
25  
26  
27  
28  
29  
30  
31

32 Corresponding Author:  
33 Dr. Anna Gottschlich  
34 Global Control of HPV Related Diseases  
35 BC Women's Hospital and Health Centre  
36 Room H203 – 4500 Oak Street (Box 42)  
37 Vancouver, BC V6H 3N1  
38 Phone: +604 649-6044  
39 E-mail: annagott@umich.edu  
40 ORCID ID: 0000-0002-3095-2323  
41  
42  
43  
44  
45  
46  
47  
48  
49

50 Abstract: 299; Words: 4077; Tables: 3; Figures: 0; References: 41  
51  
52  
53  
54  
55  
56  
57  
58  
59  
60

## Abstract

*Objectives:* Heated tobacco products (HTPs) are increasingly marketed worldwide, yet limited research on HTPs has been conducted in low- and middle-income countries (LMICs) or amongst adolescents. Guatemala is one of the few LMICs where HTPs are available. This study examined prevalence and correlates of HTP awareness, susceptibility, and use among adolescents in Guatemala.

*Design, Setting, and Participants:* A cross-sectional survey on HTP awareness, susceptibility, and use was conducted among 2870 students between the ages of 13-17 in private schools in Guatemala City, Guatemala.

*Primary and secondary outcome measures:* The primary outcome was susceptibility to future use of HTP among school-aged current and never-smokers in Guatemala. We also explored awareness and use of HTPs. Multivariate binomial regression models were used to explore associations between these outcomes and both sociodemographic factors and established smoking correlates.

*Results:* Of all students (n=2870), about half were aware of HTPs (52.4%) and susceptible to future or continued use (52.4%). Whereas 8.4% of students had tried HTPs in the lifetime (but not in the last month), only 2.9% used HTPs in the past month. Independent correlates of HTP susceptibility and use included: use of other tobacco products (current smoking: AOR=10.53 & 34.93, respectively; current e-cigarette use: AOR=21.87 & 59.31, respectively), moderate alcohol consumption (AOR=1.49 & 5.99, respectively), marijuana use in the past 30 days (AOR=3.49 & 12.57, respectively), and having friends who use HTPs (AOR = 1.83 & 44.72, respectively).

1  
2  
3 *Conclusions:* Among this sample of adolescents in Guatemala City, where tobacco  
4 control is weak, the prevalence of HTP use was low but susceptibility to future use was  
5 high. Tobacco prevention and intervention strategies for cigarettes and e-cigarettes  
6 should now also include HTPs, which tend to be used by similar adolescent populations  
7 (i.e. those who use other substances or are exposed to tobacco through family and  
8 friends).  
9  
10  
11  
12  
13  
14  
15  
16  
17  
18  
19  
20  
21  
22  
23  
24  
25  
26  
27  
28  
29  
30  
31  
32  
33  
34  
35  
36  
37  
38  
39  
40  
41  
42  
43  
44  
45  
46  
47  
48  
49  
50  
51  
52  
53  
54  
55  
56  
57  
58  
59  
60

**Strengths and Limitations:**

- HTPs are increasingly popular in countries where available, but little is known about adolescent use in LMICs with weak tobacco control policies like Guatemala.
- The study sample was selected from private high school students in Guatemala City, specifically to oversample potential HTP users but also resulted in a population not generalizable nationwide.
- This study used a previously fielded questionnaire adapted to Guatemala, and research questions, outcomes, and analysis were based on prior local work.
- Both the population of interest and public were involved in study design and implementation: a subset of students were asked to pilot and comment on the survey before implementation, participating schools were asked to review the protocol, and the Ministry of Health gave support of this study with the understanding that results will be shared and used to support tobacco control strategies.
- The data is self-reported, thus there is a chance of misreporting, particularly underreporting due to social desirability bias.

## Introduction

The increase in popularity of non-conventional tobacco products has further complicated an already challenging tobacco control landscape. For example, electronic cigarettes (e-cigarettes) increasingly appear more appealing to adolescents than conventional cigarettes; a considerable proportion of adolescent e-cigarette users have never smoked conventional cigarettes.[1,2] The appeal of e-cigarettes in younger populations is a key argument for strong regulations that would decrease youth access (e.g., increase price and legal age of purchase) and appeal (e.g., banning flavors and marketing), often outweighing arguments that policies should promote e-cigarette use among established smokers who may benefit from consumption of a less harmful product.[3] Recently, tobacco product regulation in some countries has been additionally complicated by the introduction of novel heated tobacco products (HTPs). HTPs heat but do not burn tobacco, producing an aerosol with nicotine that does not contain or has lower levels of many of the harmful chemicals in cigarette smoke.[4,5] However, current evidence on the harmful effects of HTPs compared to conventional cigarettes are yet to be determined as most of the available evidence is in vitro and comes from tobacco industry funded research.[6–9] HTPs appeal to some adult smokers and use has been rapidly increasing in some high-income countries where they have been introduced, suggesting a potential public health benefit, similar to that of e-cigarettes.[10–12] However, the appeal of HTPs among adolescents, particularly those who would otherwise not use tobacco, is relatively unknown.

Philip Morris's HTP, IQOS, was introduced in some countries in 2014, and advertised as a less harmful alternative for smokers who want to reduce exposure to

1  
2  
3 harmful chemicals produced by tobacco combustion.[13] By 2020 it was available in at  
4  
5 least 52 countries worldwide, including Guatemala[4,5,14] but, due to the fairly recent  
6  
7 introduction to the market, little is known about its awareness and use, particularly  
8  
9 among adolescents. Nonetheless, HTPs appear to quickly penetrate markets: for  
10  
11 example, one study found that among young adults in South Korea, only 3 months after  
12  
13 IQOS was introduced into the market, 38% were aware of the product and 3.5% were  
14  
15 current users.[15] Additionally, in 2018, a study of older adolescents (16-19 years old) in  
16  
17 England, Canada and the USA (where HTPs were either only available in limited areas or  
18  
19 not available at the time of the study) reported that among all participants, 7% were  
20  
21 aware of IQOS, 45% susceptible to future use, and 38% interested in trying IQOS; these  
22  
23 percentages were higher in the current smoker and e-cigarette user subpopulation.[16]  
24  
25 Notably, susceptibility to IQOS use (25%) was higher than susceptibility to conventional  
26  
27 cigarette use (19%) among never smokers or e-cigarette users, suggesting its potential  
28  
29 appeal among adolescents who otherwise would not use tobacco products.[16]  
30  
31  
32  
33  
34

35 To the best of our knowledge, only one study has reported rates of HTP use  
36  
37 among adolescents: this study, from 2019, found that among 12- to 18-year-old South  
38  
39 Koreans, ever use was 2.8%.[17] Studies among adults in high-income countries (HICs)  
40  
41 have shown that HTP awareness and use tends to be higher among males, young adults,  
42  
43 cigarette and e-cigarette smokers, and smokers with intentions to quit – all consistent risk  
44  
45 factors for e-cigarette use.[15,18,19] Although currently the correlates of HTP use among  
46  
47 adolescents are relatively unknown, they may resemble those for e-cigarette use: male,  
48  
49 current or ever smoker, having peers or parents who smoke, sensation seeking, and  
50  
51 technophilia. Some of these factors are hypothesized to be related to e-cigarette use due  
52  
53  
54  
55  
56  
57  
58  
59  
60

1  
2  
3 to Jessor's Problem Behavior Theory, which hypothesizes that engaging in one risky  
4 behavior increases the likelihood of engagement in other risky behaviors.[20–24]  
5  
6

7  
8 *Study context:*  
9

10 Guatemala is a middle-income country in Central America that signed and ratified  
11 the WHO's Framework Convention on Tobacco Control (FCTC) in 2005. However, as  
12 of 2020, the only FCTC recommended policy that has been implemented is smoke-free  
13 environments (Article 8), and this has been executed with poor enforcement.[25] In  
14 2015, the prevalence of adolescent cigarette use in Guatemala was 12.9% and the  
15 prevalence of adolescent e-cigarette use was 5.7% and 5.2% among males and females,  
16 respectively.[26,27] There is no current data on HTP use among adolescents in Latin  
17 America, or any other LMIC. This study aims to address this gap by evaluating the  
18 prevalence and correlates of HTP awareness, susceptibility, and use among adolescents in  
19 Guatemala to inform prevention and intervention strategies to target those at highest risk  
20 for tobacco use, including use of HTPs.  
21  
22  
23  
24  
25  
26  
27  
28  
29  
30  
31  
32  
33  
34  
35  
36  
37

38 **Methods**  
39

40 *Survey design and data*  
41

42 Adolescents, grades 8-12, were recruited for this cross-sectional study. Based on  
43 the official list of private and public schools in Guatemala City, 30 private schools were  
44 conveniently selected from middle to high socioeconomic urban areas and sent invitation  
45 letters to participate in the study. Six of these schools declined, four of which enrolled  
46 only boys or girls and 14 did not respond, leaving 10 participating schools. While  
47 students in grades 8-11 were recruited from all participating schools, students in the 12<sup>th</sup>  
48  
49  
50  
51  
52  
53  
54  
55  
56  
57  
58  
59  
60



1  
2  
3 grade were only recruited from five of the 10 participating schools. We obtained both  
4  
5 passive consent from parents (i.e. a consent letter was sent home with students and  
6  
7 parents were able to opt their child out of the study by signing and returning the letter)  
8  
9 and assent from participating students. All students in participating grades were invited  
10  
11 to complete the survey and no incentive was given to the participants or schools. Data  
12  
13 were collected between May and September of 2019, using a paper-based, self-  
14  
15 administered, Spanish-language survey on socio-demographics and tobacco product  
16  
17 susceptibility, use, and risk factors. The survey was previously fielded in Mexico and  
18  
19 subsequently adapted for Guatemala and pre-tested to ensure comprehension.[20] This  
20  
21 protocol was approved by the Institutional Ethics Committee of the Institute of Nutrition  
22  
23 of Central America and Panama (INCAP) (approval number 087/2019).

### 24 25 26 27 28 *Patient and public involvement*

29  
30  
31 The research questions and outcome measures, including the study questionnaire,  
32  
33 were based on our previous research on e-cigarettes in Guatemala and Mexico.[28] The  
34  
35 instrument was piloted among Guatemalan adolescents from schools not included in the  
36  
37 study sample to ensure comprehension and further edited by local researchers to fit the  
38  
39 country-specific environment. Participating schools were involved prior to data  
40  
41 collection and asked to review the study protocol. Certain schools requested that the  
42  
43 study team include 12<sup>th</sup> graders along with the proposed younger grades in the study  
44  
45 sample, and this was accommodated by the study team. Schools were aware of the time  
46  
47 required to complete the survey and surveys were only conducted in the time and place  
48  
49 allocated by each school. Additionally, a letter of support from the Ministry of Health  
50  
51 National Commission for the Prevention and Control of Chronic Disease was obtained  
52  
53  
54  
55  
56  
57  
58  
59  
60

1  
2  
3 prior to the start of the study. Results of this study will be shared with enrolled schools  
4  
5 and support will be granted to develop and tailor tobacco-use control strategies. Results  
6  
7 will also be disseminated to authorities and stakeholders for policy development.  
8  
9

### 10 11 12 *Outcome variables*

13  
14 We first assessed HTP awareness (yes, no) by showing an image and description  
15  
16 of an IQOS, the only HTP available Guatemala, and asking if they had previously heard  
17  
18 of them. Susceptibility to future HTP use was then assessed for all participants with a  
19  
20 single question adapted from Pierce et al.'s validated scale.[29] This question (prompt:  
21  
22 "If one of your friends offered you a heated tobacco product like IQOS, would you use  
23  
24 it?"; possible responses: "Definitely yes", "Probably yes", "Probably no", "Definitely  
25  
26 no") has been shown to predict smoking initiation with the same accuracy as the full  
27  
28 scale among Latin American youth.[30] Those who answered "Definitely yes", "Probably  
29  
30 yes", or "Probably no" were considered susceptible to continued or future use, while  
31  
32 those who reported "Definitely no" were categorized as unsusceptible, similar to prior  
33  
34 studies.[20] Students did not need to be previously aware of HTPs to be susceptible to  
35  
36 future use. Students were also asked if they had ever tried HTPs (yes, no) and, to assess  
37  
38 current use, if they had used HTPs in the prior 30 days. Using the above described  
39  
40 definitions, HTP use was characterized as the following four exclusive categories: never  
41  
42 used and unsusceptible to future use; never used but susceptible to future use; ever used,  
43  
44 but not currently; and current use.  
45  
46  
47  
48  
49  
50  
51  
52  
53

### 54 *Independent variables*

1  
2  
3 Sociodemographic variables that were assessed included sex (male, female), age  
4 (continuous), grade (8<sup>th</sup>-9<sup>th</sup> vs 10<sup>th</sup>-12<sup>th</sup>), school performance (averaging < 80%, 80-89%,  
5 or >90% ), highest educational attainment by either parent (primary school or less, high  
6 school or technical school, university or more), and family affluence. To assess family  
7 affluence, we used the 4-item Family Affluent Scale (FAS) (i.e., “How many cars does  
8 your family have?”, “Do you have your own bedroom?”, “How many times did your  
9 family go on vacation last year?” and “How many computers are in your house?”), which  
10 is a summative measure validated among other adolescent populations.[31]  
11  
12  
13  
14  
15  
16  
17  
18  
19  
20  
21

22 Established risk factors for smoking and e-cigarette use were also considered,  
23 including other substance use (e.g. tobacco products, alcohol, drugs). Use of cigarettes  
24 and e-cigarettes were queried and derived consistent with our definition for HTP use  
25 (never used and unsusceptible to future use; never used but susceptible to future use; ever  
26 used, but not currently; and current use). Additionally, we assessed ever use of any  
27 tobacco product (yes/no), first product used among ever-users (cigarette, e-cigarette,  
28 HTP, other), and dual use of products (yes/no; if yes, which products). Ever use of  
29 alcohol, current use (last 30 days), and recent binge drinking (4 or more drinks in one  
30 sitting in the last 30 days) were assessed and used to derive exclusive categories. We  
31 also considered ever and current marijuana use. Smoking, e-cigarette, and HTP use were  
32 measured separately for both family members (yes, no) and friends (yes, no among five  
33 closest friends).  
34  
35  
36  
37  
38  
39  
40  
41  
42  
43  
44  
45  
46  
47  
48

49 Other common risk factors for smoking and vaping that were considered in this  
50 study included frequency of exposure to internet advertising (i.e., never;  
51 rarely/sometimes; often/very often) for both smoking and e-cigarettes, assessed  
52  
53  
54  
55  
56  
57  
58  
59  
60

1  
2  
3 separately. Sensation seeking (in accordance with Jessor's Problem Behavior Theory)  
4 was evaluated with four items (i.e., "I would like to explore strange places", "I like to do  
5 things that scare me", "I like new and exciting experiences, even when I am breaking the  
6 rules", and "Sometimes I do crazy things just for fun") with Likert responses (1=strongly  
7 disagree; 5=strongly agree) and averaged together (alpha = 0.77). We also measured  
8 "technophilia", which is a positive orientation toward new technology adoption, using  
9 seven items that have been previously shown to independently predict e-cigarette, but not  
10 smoking, initiation (i.e., having internet access in their room; having a laptop in their  
11 room; owning a tablet; having a cellphone with internet access; frequency of using social  
12 media; enjoyment from using the internet; level of interest in new technologies).[32,33]  
13  
14  
15  
16  
17  
18  
19  
20  
21  
22  
23  
24  
25  
26  
27

### 28 *Statistical analysis*

29  
30 Binary logistic regression was used to estimate crude odds ratios (OR) for the  
31 association between each independent variable and key outcomes: 1. HTP awareness  
32 (yes, no) among all participants; 2. Susceptibility to future HTP use (yes, no) among all  
33 participants; 3. Ever HTP use (yes, no) among non-current users; and 4. Current HTP use  
34 (yes, no) among all participants. A cut off of less than 5% missing was a necessary  
35 criterion for inclusion of each variable in the models. However, no variables had more  
36 than 5% missing data, and thus all were included in the final analyses. Parent educational  
37 attainment was borderline (4.8%) so a "missing" category was included for this variable.  
38 Due to the low prevalence of HTP use, particularly current use, categories of cigarette, e-  
39 cigarette, and alcohol use were collapsed in some models to increase small cell counts.  
40  
41  
42  
43  
44  
45  
46  
47  
48  
49  
50  
51  
52  
53  
54 In the current HTP use model, cigarette and e-cigarette use was collapsed to non-current  
55  
56  
57  
58  
59  
60

1  
2  
3 vs. current and alcohol was collapsed to non-recent-binge vs. recent-binge. Next, for  
4  
5 each outcome, multivariate logistic regression models were calculated to estimate the  
6  
7 adjusted ORs (AORs) associated with each independent variable, adjusting for all other  
8  
9 independent variables. Crude and adjusted models included a random intercept to adjust  
10  
11 for non-independence of observations within schools. In all models, we evaluated  
12  
13 collinearity among independent variables by examining the variance inflation factor, and  
14  
15 results indicated no collinearity concerns. All analyses were conducted in R version  
16  
17  
18  
19 3.4.4.

## 20 21 22 23 24 **Results**

### 25 26 *Participants*

27  
28 At the 10 schools, 3311 students were invited to participate and 2870 (87%)  
29  
30 completed the survey: 271 (8%) were absent, 135 (4%) did not have permission from  
31  
32 their parents, 28 (<1%) refused and 2 (<1%) did not speak Spanish. Five (<1%) students  
33  
34 who did not complete the survey gave no reason as to why they did not wish to  
35  
36 participate.  
37

38  
39 About half of participants were male and the mean age was slightly over 15 years  
40  
41 (Table 1). Most respondents were in the higher grades (grades 10, 11, and 12) (56.9%),  
42  
43 had an average grade of 80% or higher (81.2%), and had at least one parent with a  
44  
45 university degree or higher (75%).  
46  
47

48  
49 Over half (52.4%) of students reported having heard of HTPs and 8.4% and 2.9%  
50  
51 reported ever- (but not current) and current use of HTPs, respectively. In the entire  
52  
53 sample, 52% were susceptible to future HTP use. In this sample, 939 (32.7%) students  
54  
55  
56  
57  
58  
59

1  
2  
3 were both previously aware of HTPs and susceptible to future use, while 802 (27.9%)  
4 were neither previously aware nor susceptible to future use. Furthermore, 563 (19.6%)  
5 were previously aware but not susceptible, and 560 (19.5%) were not previously aware  
6 but were susceptible. Over half (58.4%) had used a tobacco product at some point in  
7 their life; most ever-tobacco users first used e-cigarettes (54.0%) or cigarettes (43.2%).  
8 Only 1.5% of ever-tobacco users first used an HTP. Nearly half (44%) of students had  
9 never smoked conventional cigarettes and were unsusceptible to future cigarette use, 30%  
10 had tried smoking, and 9% were current smokers. Regarding e-cigarettes, 56% reported  
11 ever-use and 28% currently use e-cigarettes. Of current tobacco users, the majority only  
12 used e-cigarettes (65.9%) and only 0.5% currently used HTP but not cigarettes or e-  
13 cigarettes.

14  
15 Considering other substances, one quarter (24%) reported never consuming  
16 alcohol and 20% reported at least one instance of binge drinking in the past 30 days.  
17 Most (90.2%) had never used marijuana. About 50% of students report seeing online  
18 cigarette or e-cigarette advertising rarely or sometimes when they use the internet.  
19 Family use of cigarettes, e-cigarettes, or HTPs was 35.8%, 21.0%, and 13.8%,  
20 respectively. Concerning friend cigarette, e-cigarette, or HTP use, the corresponding  
21 percentages were 54.1%, 63.6%, and 14.8%, respectively.

### 22 *Factors associated with HTP awareness and susceptibility*

23  
24 About half (52.4%) of students reported awareness of HTPs. HTP awareness was  
25 higher for ever- (AOR = 1.65, 95% CI = 1.23, 2.21) and current users of e-cigarettes  
26 (AOR = 2.10, 95% CI = 1.47, 2.99), binge drinkers (AOR = 1.84, 95% CI = 1.28, 2.65)

1  
2  
3 and those exposed to medium (AOR = 1.39, 95% CI = 1.10, 1.75) and high levels of  
4  
5 online e-cigarette advertising (AOR = 1.76, 95% CI = 1.26, 2.46) (Table 2).  
6

7  
8 Additionally, family smoking (AOR = 1.31, 95% CI = 1.07, 1.60) and HTP use (AOR =  
9  
10 1.60, 95% CI = 1.22, 2.09), family affluence (AOR = 1.10, 95% CI = 1.04, 1.17), and  
11  
12 friend HTP use (AOR = 4.15, 95% CI = 3.11, 5.55) were positively associated with  
13  
14 participant HTP awareness.  
15

16  
17 In the entire sample, 52.4% were susceptible to continued or future HTP use.  
18  
19 Compared to unsusceptible never-smokers, higher susceptibility was found among  
20  
21 susceptible never- (AOR = 6.18, 95% CI = 4.72, 8.07), ever- (AOR = 6.93, 95% CI =  
22  
23 5.02, 9.57), and current smokers (AOR = 10.53, 95% CI = 5.92, 18.71), as well as  
24  
25 susceptible never- (AOR = 12.18, 95% CI = 7.79, 19.03), ever- (AOR = 11.08, 95% CI =  
26  
27 7.07, 17.37), and current e-cigarettes users (AOR = 21.87, 95% CI = 13.02, 36.71).  
28  
29 Similarly, ever- (AOR = 1.73, 95% CI = 1.25, 2.41), current (AOR = 1.49, 95% CI =  
30  
31 1.03, 2.17), and binge drinkers (AOR = 1.65, 95% CI = 1.04, 2.60), and current  
32  
33 marijuana users (AOR = 3.49, 95% CI = 1.40, 2.60) were more likely to be susceptible to  
34  
35 HTP use. Finally, having a friend who used HTPs (AOR = 1.83, 95% CI = 1.31, 2.57)  
36  
37 and higher sensation-seeking scores (AOR = 1.41, 95% CI = 1.19, 1.68) were positively  
38  
39 associated with HTP susceptibility.  
40  
41  
42  
43  
44  
45  
46

#### 47 *Factors associated with HTP use (ever and current)*

48

49 Among non-current HTP users, 8.6% had tried HTPs. Students who were ever-  
50  
51 (AOR = 3.73, 95% CI = 2.03, 6.82) or current smokers (AOR = 6.63, 95% CI = 3.20,  
52  
53 13.74), or ever- (AOR = 9.31, 95% CI = 2.61, 33.23) or current e-cigarette users (AOR =  
54  
55  
56  
57  
58  
59  
60

1  
2  
3 10.40, 95% CI = 2.75, 39.17) were more likely to be ever HTP users (Table 3). Those  
4 who reported binge drinking (AOR = 2.53, 95% CI = 1.08, 5.95) and marijuana use  
5 (AOR = 2.29, 95% CI = 1.27, 4.13) were also more likely to be ever-HTP users. Family  
6 smoking (AOR = 1.70, 95% CI = 1.19, 2.45) and friend HTP use (AOR = 7.28, 95% CI =  
7 4.64, 11.43) were associated with higher odds of ever use of HTPs. Higher family  
8 affluence was also associated with ever use (AOR = 1.15, 95% CI = 1.02, 1.31).  
9

10  
11  
12  
13  
14  
15  
16  
17 In the overall population, 2.9% were current HTP users. The odds of current HTP  
18 use was higher for both cigarette (AOR = 6.14, 95% CI = 2.71, 13.93) and e-cigarette  
19 users (AOR = 84.90, 95% CI = 24.19, 298.22). Having family members who smoked  
20 (AOR = 3.25, 95% CI = 1.51, 7.02) and friends who used HTPs (AOR = 44.72, 95% CI =  
21 20.08, 99.58) were associated with higher odds current use of HTPs.  
22  
23  
24  
25  
26  
27  
28  
29

## 30 31 **Discussion**

32  
33 We investigated HTP use among adolescents in private schools in Guatemala  
34 City, where HTPs are readily available.[34] About half of the students were aware of  
35 HTPs (54.2%) and susceptible to future use of HTPs (54.2%), although ever (but not  
36 current) HTP use (8.4%) and current HTP use (2.9%) were low compared to smoking  
37 (21.0% and 8.7%, respectively) and e-cigarette use (28.3% and 27.7%, respectively).  
38  
39 Furthermore, almost none of the students who had ever used any tobacco product  
40 reported using HTPs as their first tobacco product (1.5%), and nearly all current HTP  
41 users also either smoked cigarettes (52.4%) or used e-cigarettes (92.9%). These results  
42 suggest that in this population HTPs are not a gateway tobacco product, as has been  
43 reported for e-cigarettes in many locations, including in Latin America, even though there  
44  
45  
46  
47  
48  
49  
50  
51  
52  
53  
54  
55  
56  
57  
58  
59  
60



1  
2  
3 is evidence against this claim.[35–37] However, the high prevalence of susceptibility to  
4 future use that we found suggests that this may change if HTPs become more popular or  
5  
6 accessible.  
7  
8  
9

10 Currently, the available data on HTP awareness and use is from HICs with  
11 stronger tobacco control policies, making cross-country comparisons challenging. One  
12 study of 16- to 19-year-old adolescents in Canada, the United States, and England[16],  
13 found lower levels of awareness (7%) and susceptibility (45.0%) compared to our sample  
14 (52.4% and 52.4%, respectively). However, this study only included never-smokers and  
15 never-vapers. As we found that HTP susceptibility was associated with smoking and e-  
16 cigarette use, it is unsurprising that rates are higher in our study population, which  
17 reported use of tobacco. Additionally, use of alcohol or marijuana, family and friend use  
18 of tobacco products, and higher sensation-seeking were all positively associated with  
19 susceptibility to continued and future use of HTPs in adolescents; these variables have  
20 not been previously studied, but the associations we found are not unexpected given prior  
21 research on e-cigarettes susceptibility and use.[20–23] In the end, our results support  
22 Jessor’s Problem Behavior Theory, which hypothesizes that substance use and other risk  
23 behaviors tend to cluster together.[24]  
24  
25  
26  
27  
28  
29  
30  
31  
32  
33  
34  
35  
36  
37  
38  
39  
40  
41

42 To our knowledge, the only other study of adolescents’ current use of HTPs  
43 comes from South Korea.[17] This 2019 study among 12-18 year old Korean adolescents  
44 found lower ever-use HTP rates than in our sample (2.8% vs. 8.4%), despite the fact that  
45 HTPs have been on the market for longer in Korea than Guatemala. [17] While South  
46 Korea has a much higher GDP per capita than Guatemala, our study population was  
47 selected from private schools in middle and high SES neighborhoods in Guatemala City,  
48  
49  
50  
51  
52  
53  
54  
55  
56  
57  
58  
59  
60

1  
2  
3 which are predominantly attended by students of significant higher socioeconomic status,  
4 and this could be the cause of the discrepancy. For example, the average monthly cost to  
5 attend one of the schools in our study is \$388-420USD plus an annual enrollment fee of  
6 on average \$550USD, and a 2020 report from the World Bank[38] found that about 50%  
7 of Guatemalans live below the upper-middle income poverty line of about \$165USD per  
8 month. However, according to the 2018 census, 37% of middle school students and 70%  
9 of high school students in Guatemala City attend private schools, so our results may be  
10 more generalizable to the rest of Guatemala City, but not the entire country.[39] Our  
11 study goes beyond the Korean study by assessing correlates of use, which appear similar  
12 to those for e-cigarette use among adolescents.[20–22] For example, correlates of HTP  
13 use in our study are also as predictors of e-cigarette use in Mexico (use of cigarettes,  
14 alcohol, and marijuana, family use of cigarettes, and sensation-seeking behavior).[20]  
15 We also found that e-cigarette use was a correlate of HTP use.  
16  
17  
18  
19  
20  
21  
22  
23  
24  
25  
26  
27  
28  
29  
30  
31  
32

33 To the best of our knowledge, our study is the first to assess HTP awareness or  
34 use amongst adolescents from LMICs. Furthermore, we did so in a country with weak  
35 FCTC implementation where HTPs, e-cigarettes and cigarettes are all readily available.  
36 In addition, we used a previously implemented survey that includes novel predictors (e.g.  
37 technophilia, sensation-seeking) of non-conventional tobacco product use. However, our  
38 results must be interpreted in the context of the study's limitations. All data were self-  
39 reported, although the directionality of any biases is not clear. This resulted in an  
40 expected amount of uncertainty due to misreporting. The sample was recruited from  
41 private schools, which predominantly serve middle and high-income students. Therefore,  
42 generalizability to the entire country is limited. Additionally, only four students  
43  
44  
45  
46  
47  
48  
49  
50  
51  
52  
53  
54  
55  
56  
57  
58  
59  
60

1  
2  
3 exclusively used HTPs (i.e., did not also smoke or use e-cigarettes), and thus is it hard to  
4 draw conclusions about this group. Because of this, model estimates include some large  
5 odds ratios (with similarly large confidence intervals) when examining associations  
6 between HTP use and other tobacco product use. These estimates could be made more  
7 precise with larger sample sizes, but they may also reflect the fact that HTP use typically  
8 follows use of other tobacco products and substances – in other words, at this time HTPs  
9 do not appear to be a “gateway” product for Guatemalan youth. Finally, the data are  
10 cross-sectional and so preclude causal inference for some time-varying variables in the  
11 analyses.  
12  
13  
14  
15  
16  
17  
18  
19  
20  
21  
22  
23

24 Despite its limitations, this study is the first of its kind to examine HTP use and its  
25 correlates among adolescents in an LMIC. While current HTP use is low in our study  
26 population, a large portion of the population is susceptible to continued or future use and  
27 rates of use may increase as IQOS and other HTP products become more widely  
28 available. This phenomenon could be seen across the world, where there may be a rapid  
29 increase in consumption as availability grows. Particularly concerning is the introduction  
30 of flavored HTPs in some countries, including sticks that contain flavor capsules in the  
31 filter that the consumer can crush to make the aerosol taste like diverse flavors, ranging  
32 from mint to ginger and bubble gum.[40] Flavor capsules in cigarettes, which include an  
33 even broader range of flavors (e.g., mango, mint, berry) that are popular with youth, are  
34 increasingly popular around the world, including in Guatemala, where they represented  
35 32% of the cigarette market in 2017.[41] Currently, it does not seem like HTPs are  
36 gateway tobacco products for adolescents, as most current users in our sample report  
37 initially using e-cigarettes. However, as HTPs become more common and integrate new  
38  
39  
40  
41  
42  
43  
44  
45  
46  
47  
48  
49  
50  
51  
52  
53  
54  
55  
56  
57  
58  
59  
60

1  
2  
3 flavors and flavor technologies, it is possible that this could change, particularly as the  
4  
5 global e-cigarette market might become more regulated. It is critical to identify who is at  
6  
7 risk for tobacco product uptake, including HTP use, so that control and prevention  
8  
9 strategies can be prioritized for this high-risk group. This study adds evidence to the  
10  
11 literature to assist decision-makers in building a profile to identify the subset of  
12  
13 adolescents who are most at risk for tobacco use in the form of HTPs, allowing for the  
14  
15 development of tailored prevention programs which could reduce current HTP use and  
16  
17 potentially use of other tobacco products as well as deter future use among adolescents.  
18  
19 Future studies should investigate whether rates of HTP use and predictors for HTP use  
20  
21 are similar among other populations in Guatemala, including adults and other socio-  
22  
23 economic groups as well as explore how adolescent e-cigarette users transition to HTP  
24  
25 use.  
26  
27  
28  
29  
30  
31  
32  
33  
34  
35  
36  
37  
38  
39  
40  
41  
42  
43  
44  
45  
46  
47  
48  
49  
50  
51  
52  
53  
54  
55  
56  
57  
58  
59  
60

1  
2  
3 **Funding:** This work was supported by Fogarty International Center of the National  
4  
5 Institutes of Health under award number R01 TW010652. The content is solely the  
6  
7 responsibility of the authors and does not necessarily represent the official views of the  
8  
9 National Institutes of Health.  
10

11  
12 **Competing Interests:** None declared.  
13

14 **Author Contributions:** AG – analysis design and execution, drafted manuscript; SM –  
15  
16 study design, questionnaire design, data collection, manuscript review and approval; JM  
17  
18 – study design, questionnaire design, data collection, manuscript review and approval; JT  
19  
20 – study design, questionnaire design, analysis design, manuscript review and approval;  
21  
22  
23 JB – study design, questionnaire design, data collection, manuscript review and approval,  
24  
25 stakeholder engagement  
26  
27

28 **Data Availability Statement:** The datasets used and/or analyzed during the current study  
29  
30 are available from the corresponding author on reasonable request.  
31  
32  
33  
34  
35  
36  
37  
38  
39  
40  
41  
42  
43  
44  
45  
46  
47  
48  
49  
50  
51  
52  
53  
54  
55  
56  
57  
58  
59  
60

## References

- 1 Demissie Z, Jones SE, Clayton HB, *et al.* Adolescent risk behaviors and use of electronic vapor products and cigarettes. *Pediatrics* 2017;**139**. doi:10.1542/peds.2016-2921
- 2 Carroll Chapman SL, Wu LT. E-cigarette prevalence and correlates of use among adolescents versus adults: A review and comparison. *J Psychiatr Res* 2014;**54**:43–54. doi:10.1016/j.jpsychires.2014.03.005
- 3 Frieden TR, Jaffe HW, Richards CL, *et al.* E-Cigarette Use Among Youth and Young Adults. A Report of the Surgeon General. GA:U.S.: 2016.
- 4 WHO. Heated tobacco products (HTPs) information sheet. *Who* 2018;:2–3.
- 5 Auer R, Concha-Lozano N, Jacot-Sadowski I, *et al.* Heat-not-burn tobacco cigarettes: Smoke by any other name. *JAMA Intern Med* 2017;**177**:1050–2. doi:10.1001/jamainternmed.2017.1419
- 6 Nabavizadeh P, Liu J, Havel CM, *et al.* Vascular endothelial function is impaired by aerosol from a single IQOS HeatStick to the same extent as by cigarette smoke. *Tob Control* 2018;**27**:s13–9. doi:10.1136/tobaccocontrol-2018-054325
- 7 Drovandi A, Salem S, Barker D, *et al.* Human Biomarker Exposure From Cigarettes Versus Novel Heat-Not-Burn Devices: A Systematic Review and Meta-Analysis. *Nicotine Tob Res* 2020;**22**:1077–85. doi:10.1093/ntr/ntz200
- 8 Leigh NJ, Tran PL, O'Connor RJ, *et al.* Cytotoxic effects of heated tobacco products (HTP) on human bronchial epithelial cells. *Tob Control* 2018;**27**:s26–9. doi:10.1136/tobaccocontrol-2018-054317
- 9 Stepanov I, Woodward A. Heated tobacco products: Things we do and do not know. *Tob Control* 2018;**27**:s7–8. doi:10.1136/tobaccocontrol-2018-054774
- 10 Cruz-jiménez L, Barrientos-gutiérrez I, Coutiño-escamilla L. Adult Smokers ' Awareness and Interest in Trying Heated Tobacco Products : Perspectives from Mexico , where HTPs and E-Cigarettes Are Banned. Published Online First: 2020. doi:10.3390/ijerph17072173
- 11 Caputi TL, Leas E, Dredze M, *et al.* They're heating up: Internet search query trends reveal significant public interest in heat-not-burn tobacco products. *PLoS One* 2017;**12**:1–7. doi:10.1371/journal.pone.0185735
- 12 Liu X, Lugo A, Spizzichino L, *et al.* Heat-not-burn tobacco products are getting hot in Italy. *J Epidemiol* 2018;**28**:274–5. doi:10.2188/jea.JE20180040
- 13 Philip Morris International. Tobacco Meets Technology.
- 14 Glantz SA. Heated tobacco products: The example of IQOS. *Tob Control* 2018;**27**:s3–6. doi:10.1136/tobaccocontrol-2018-054601
- 15 Kim J, Yu H, Lee S, *et al.* Awareness, experience and prevalence of heated tobacco product, IQOS, among young Korean adults. *Tob Control* 2018;**27**:s74–7. doi:10.1136/tobaccocontrol-2018-054390
- 16 Czoli CD, White CM, Reid JL, *et al.* Awareness and interest in IQOS heated tobacco products among youth in Canada, England and the USA. *Tob Control* 2019;:1–7. doi:10.1136/tobaccocontrol-2018-054654
- 17 Kang H, Cho S II. Heated tobacco product use among Korean adolescents. *Tob Control* 2019;:1–3. doi:10.1136/tobaccocontrol-2019-054949
- 18 Nyman AL, Weaver SR, Popova L, *et al.* Awareness and use of heated tobacco products among US adults, 2016-2017. *Tob Control* 2018;**27**:s55–61. doi:10.1136/tobaccocontrol-2018-054323
- 19 Brose LS, Simonavicius E, Cheeseman H. Awareness and Use of 'Heat-not-burn' Tobacco Products in Great Britain. *Tob Regul Sci* 2018;**4**:44–50. doi:10.18001/trs.4.2.4
- 20 Thrasher JF, Abad-Vivero EN, Barrientos-Gutiérrez I, *et al.* Prevalence and Correlates of E-Cigarette Perceptions and Trial among Early Adolescents in Mexico. *J Adolesc Heal* 2016;**58**:358–65. doi:10.1016/j.jadohealth.2015.11.008
- 21 Morello P, Perez A, Peña L, *et al.* Prevalence and predictors of e-cigarette trial among adolescents in Argentina. *Tob Prev Cessat* 2016;**2**:1–8. doi:10.18332/tpc/66950
- 22 Zavala-Arciniega L, Reynales-Shigematsu LM, Lozano P, *et al.* Patterns of awareness and use of electronic cigarettes in Mexico, a middle-income country that bans them: Results from a 2016 national survey. *Prev Med (Baltim)* 2018;**116**:211–8. doi:10.1016/j.ypmed.2018.09.018
- 23 Vardavas CI, Filippidis FT, Agaku IT. Determinants and prevalence of e-cigarette use throughout the European union: A secondary analysis of 26 566 youth and adults from 27 countries. *Tob*

- 1  
2  
3  
4  
5  
6  
7  
8  
9  
10  
11  
12  
13  
14  
15  
16  
17  
18  
19  
20  
21  
22  
23  
24  
25  
26  
27  
28  
29  
30  
31  
32  
33  
34  
35  
36  
37  
38  
39  
40  
41  
42  
43  
44  
45  
46  
47  
48  
49  
50  
51  
52  
53  
54  
55  
56  
57  
58  
59  
60
- Control* 2015;**24**:442–8. doi:10.1136/tobaccocontrol-2013-051394
- 24 Crowther B, Jessor R, Jessor SL. Problem Behavior and Psychosocial Development: A  
Longitudinal Study of Youth. *Contemp Sociol* Published Online First: 1978. doi:10.2307/2065689
- 25 Barnoya J, Monzon JC, Briz P, *et al.* Compliance to the smoke-free law in Guatemala 5-years after  
implementation. *BMC Public Health* 2016;:1–5. doi:10.1186/s12889-016-2960-x
- 26 WHO. Guatemala Metropolitan Area-STEPS 2015 Fact sheet. 2015;:4–6. doi:10.7  
27 Youth G, Survey T, Sheet F, *et al.* Guatemala 2015. 2015;:3–4.
- 28 Cruz-Jiménez L, Barrientos-Gutiérrez I, Coutiño-Escamilla L, *et al.* Adult Smokers' Awareness  
and Interest in Trying Heated Tobacco Products: Perspectives from Mexico, where HTPs and E-  
Cigarettes Are Banned. *Int J Environ Res Public Health* 2020;**17**. doi:10.3390/ijerph17072173
- 29 Pierce JP, Choi WS, Gilpin EA, *et al.* Validation of useceptibility as a predictor of which  
adolescents take up smoking in the United States. *Heal Psychol* 1996;**15**:355–61.  
doi:10.1037/0278-6133.15.5.355
- 30 Morello P, Pérez A, Braun SN, *et al.* Smoking susceptibility as a predictive measure of cigarette  
and e-cigarette use among early adolescents. *Salud Publica Mex* 2018;**60**:423–31.  
doi:10.21149/9193
- 31 Boyce W, Torsheim T, Currie C, *et al.* The family affluence scale as a measure of national wealth:  
Validation of an adolescent self-report measure. *Soc Indic Res* 2006;**78**:473–87.  
doi:10.1007/s11205-005-1607-6
- 32 Barrientos-Gutierrez I, Lozano P, Arillo-Santillan E, *et al.* “Technophilia”: A new risk factor for  
electronic cigarette use among early adolescents? *Addict Behav* 2019;**91**:193–200.  
doi:10.1016/j.addbeh.2018.09.004
- 33 Zavala-Arciniega L, Lozano P, Kollath-Cattano C, *et al.* E-cigarette use frequency and motivations  
among current users in middle school. *Drug Alcohol Depend* 2019;**204**:107585.  
doi:10.1016/j.drugalcdep.2019.107585
- 34 Barnoya J, Monzon D, Pinetta J, *et al.* FLAVOR CAPSULE CIGARETTES, ELECTRONIC  
CIGARETTES, AND HEAT NOT BURN PRODUCTS POINT OF SALE ADVERTISING IN  
GUATEMALA. In: *The Society for Research on Nicotine and Tobacco*. 2020. New Orleans, USA.
- 35 Soneji S, Barrington-Trimis JL, Wills TA, *et al.* Association between initial use of e-cigarettes and  
subsequent cigarette smoking among adolescents and young adults a systematic review and meta-  
analysis. *JAMA Pediatr* 2017;**171**:788–97. doi:10.1001/jamapediatrics.2017.1488
- 36 Lozano P, Barrientos-Gutierrez I, Arillo-Santillan E, *et al.* A longitudinal study of electronic  
cigarette use and onset of conventional cigarette smoking and marijuana use among Mexican  
adolescents. *Drug Alcohol Depend* 2017;**180**:427–30. doi:10.1016/j.drugalcdep.2017.09.001
- 37 Levy DT, Warner KE, Michael Cummings K, *et al.* Examining the relationship of vaping to  
smoking initiation among US youth and young adults: A reality check. *Tob Control* 2019;**28**:629–  
35. doi:10.1136/tobaccocontrol-2018-054446
- 38 The World Bank. Poverty & Equity Brief: Latin America & the Caribbean, Guatemala. 2020.
- 39 Instituto NacionaI de Estadística Guatemala INE. XII Censo Nacional de Población y VII de  
40 Vivienda. Guatemala: 2019.
- 41 Cho YJ, Thrasher JF. Flavour capsule heat-sticks for heated tobacco products. *Tob Control*  
2019;**28**:E158–9. doi:10.1136/tobaccocontrol-2018-054472
- 41 Moodie C, Thrasher JF, Cho YJ, *et al.* Flavour capsule cigarettes continue to experience strong  
global growth. *Tob Control* 2018;:1–2. doi:10.1136/tobaccocontrol-2018-054711

Table 1. Characteristics of secondary school student participants in Guatemala, 2019 (N = 2870)

|                                            | N      | %     |
|--------------------------------------------|--------|-------|
| <b>Dependent variables</b>                 |        |       |
| Aware of HTP                               | 1503   | 52.4  |
| Susceptible to HTP                         | 1500   | 52.4  |
| HTP use                                    |        |       |
| Never (unsusceptible) <sup>A</sup>         | 1993   | 69.6  |
| Never (susceptible) <sup>B</sup>           | 547    | 19.1  |
| Ever (not current)                         | 241    | 8.4   |
| Current                                    | 84     | 2.9   |
| <b>Socio-demographic characteristics</b>   |        |       |
| Sex                                        |        |       |
| Male                                       | 1438   | 50.3  |
| Female                                     | 1420   | 49.7  |
| Age (Mean, SD)*                            | 15.09* | 1.32* |
| Grade - USA categories                     |        |       |
| Basico (grades 8-9)                        | 1238   | 43.1  |
| Bachillerato (grades 10-12)                | 1632   | 56.9  |
| School performance                         |        |       |
| < 80%                                      | 523    | 18.8  |
| 80-89%                                     | 1321   | 47.6  |
| 90-100%                                    | 932    | 33.6  |
| Parents' highest educational attainment    |        |       |
| Secondary school or less                   | 49     | 1.7   |
| High school or technical school            | 537    | 18.7  |
| University or more                         | 2146   | 74.8  |
| Missing                                    | 138    | 4.8   |
| <b>Substance use variables</b>             |        |       |
| Ever use of any tobacco product            | 1675   | 58.4  |
| Of ever users, first tobacco product used: |        |       |
| Cigarette                                  | 456    | 43.2  |
| E-cigarette                                | 570    | 54.0  |
| HTP                                        | 16     | 1.5   |
| Other                                      | 13     | 1.2   |
| Cigarette smoker                           |        |       |
| Never (unsusceptible)*                     | 1261   | 44.0  |
| Never (susceptible)*                       | 754    | 26.3  |
| Ever (not current)                         | 601    | 21.0  |
| Current                                    | 250    | 8.7   |
| E-cigarette user                           |        |       |
| Never (unsusceptible)*                     | 713    | 25.0  |
| Never (susceptible)*                       | 545    | 19.1  |
| Ever (not current)                         | 808    | 28.3  |
| Current                                    | 791    | 27.7  |
| Of current smokers, which product used:    |        |       |
| Only cigarettes                            | 48     | 5.7   |
| Only e-cigarettes                          | 556    | 65.9  |
| Only HTPs                                  | 4      | 0.5   |
| More than one product                      | 236    | 30.0  |
| Of current HTP users:                      |        |       |
| Also smokes cigarettes                     | 44     | 52.4  |
| Also smokes e-cigarettes                   | 78     | 92.9  |
| Alcohol user                               |        |       |
| Never                                      | 683    | 23.9  |
| Ever (not current)                         | 935    | 32.7  |
| Current (no binge)                         | 676    | 23.7  |
| Current (binge) <sup>C</sup>               | 561    | 19.6  |
| Marijuana user                             |        |       |
| Never                                      | 2563   | 90.2  |
| Ever (not current)                         | 177    | 6.2   |
| Current                                    | 103    | 3.6   |
| Internet cigarette ad exposure             |        |       |
| Never                                      | 980    | 34.5  |
| Rarely/sometimes                           | 1543   | 54.3  |
| Mostly/always                              | 319    | 11.2  |
| Internet e-cigarette ad exposure           |        |       |
| Never                                      | 881    | 31.0  |
| Rarely/sometimes                           | 1471   | 51.8  |
| Mostly/always                              | 490    | 17.2  |
| Family member smokes cigarettes            | 1025   | 35.8  |



|                                         |             |           |
|-----------------------------------------|-------------|-----------|
| Family member uses e-cigarettes         | 599         | 21.0      |
| Family member uses HTP                  | 395         | 13.8      |
| Friend smokes cigarettes                | 1551        | 54.1      |
| Friend smokes e-cigarettes              | 1817        | 63.6      |
| Friend uses HTP                         | 423         | 14.8      |
| <b>Constructed scales (score range)</b> | <b>Mean</b> | <b>SD</b> |
| Sensation seeking (1-4)                 | 2.77        | 0.7       |
| Technophilia (0-7)                      | 5.73        | 0.9       |
| Family affluent scale (0-9)             | 7.27        | 1.57      |

<sup>A</sup> Unsusceptible is defined as answering definitely no to both "Do you think you will smoke in the next 12 months?" and "If one of your best friends offered you a cigarette, would you smoke it?"

<sup>B</sup> Susceptible is defined as answering probably no, probably yes, or definitely yes to either "Do you think you will smoke in the next 12 months?" or "If one of your best friends offered you a cigarette, would you smoke it?"

<sup>C</sup> Binge drinking is defined as consuming 4 or more drinks on one occasion in the last month

For peer review only

Table 2. Crude and adjusted odds ratios for awareness and susceptibility of HTP among Guatemalan youth<sup>A</sup>

|                                                 | HTP awareness<br>N = 1503 (52.4%) |           |              |                  |              | HTP susceptible<br>N = 1500 (52.4%) |           |                 |                  |                |
|-------------------------------------------------|-----------------------------------|-----------|--------------|------------------|--------------|-------------------------------------|-----------|-----------------|------------------|----------------|
|                                                 | %                                 | OR        | CI 95%       | AOR <sup>B</sup> | CI 95%       | %                                   | OR        | CI 95%          | AOR <sup>B</sup> | CI 95%         |
| <b><i>Socio-demographic characteristics</i></b> |                                   |           |              |                  |              |                                     |           |                 |                  |                |
| <b>Sex</b>                                      |                                   |           |              |                  |              |                                     |           |                 |                  |                |
| Female                                          | 54.94                             | Reference |              | Reference        |              | 52.33                               | Reference |                 | Reference        |                |
| Male                                            | 49.72                             | 0.86      | (0.74, 1.01) | 0.81*            | (0.68, 0.97) | 52.40                               | 0.98      | (0.84, 1.14)    | 0.83             | (0.66, 1.04)   |
| Age (Mean) <sup>A</sup>                         | 15.29 <sup>A</sup>                | 1.25*     | (1.17, 1.32) | 1.05             | (0.93, 1.18) | 15.26 <sup>A</sup>                  | 1.29*     | (1.22, 1.37)    | 0.93             | (0.79, 1.08)   |
| <b>Grade - USA categories</b>                   |                                   |           |              |                  |              |                                     |           |                 |                  |                |
| Basico (grades 8-9)                             | 43.77                             | Reference |              | Reference        |              | 44.04                               | Reference |                 | Reference        |                |
| Bachillerato (grades 10-12)                     | 58.95                             | 1.73*     | (1.48, 2.02) | 1.00             | (0.74, 1.35) | 58.64                               | 1.92*     | (1.64, 2.24)    | 1.08             | (0.73, 1.59)   |
| <b>School performance</b>                       |                                   |           |              |                  |              |                                     |           |                 |                  |                |
| < 80%                                           | 53.26                             | Reference |              | Reference        |              | 60.92                               | Reference |                 | Reference        |                |
| 80-89%                                          | 54.62                             | 1.02      | (0.82, 1.27) | 1.30*            | (1.01, 1.67) | 55.12                               | 0.75*     | (0.61, 0.93)    | 0.88             | (0.64, 1.20)   |
| 90-100%                                         | 48.61                             | 0.72*     | (0.57, 0.92) | 1.13             | (0.85, 1.51) | 44.58                               | 0.49*     | (0.39, 0.62)    | 0.83             | (0.58, 1.19)   |
| <b>Parents' highest educational attainment</b>  |                                   |           |              |                  |              |                                     |           |                 |                  |                |
| Secondary school or less                        | 53.06                             | Reference |              | Reference        |              | 46.94                               | Reference |                 | Reference        |                |
| High school or technical school                 | 52.33                             | 1.00      | (0.55, 1.83) | 0.75             | (0.37, 1.51) | 52.33                               | 1.23      | (0.69, 2.22)    | 1.07             | (0.43, 2.67)   |
| University or more                              | 52.87                             | 1.06      | (0.60, 1.90) | 0.80             | (0.41, 1.59) | 53.29                               | 1.27      | (0.72, 2.24)    | 1.34             | (0.55, 3.27)   |
| Missing                                         | 45.26                             | 0.71      | (0.37, 1.40) | 0.91             | (0.40, 2.05) | 39.71                               | 0.75      | (0.39, 1.46)    | 1.11             | (0.39, 3.16)   |
| <b><i>Substance use variables</i></b>           |                                   |           |              |                  |              |                                     |           |                 |                  |                |
| <b>Cigarette smoker</b>                         |                                   |           |              |                  |              |                                     |           |                 |                  |                |
| Never (unsusceptible)                           | 41.59                             | Reference |              | Reference        |              | 17.00                               | Reference |                 | Reference        |                |
| Never (susceptible)                             | 51.39                             | 1.54*     | (1.28, 1.86) | 0.88             | (0.69, 1.13) | 75.90                               | 15.68*    | (12.52, 19.65)  | 6.18*            | (4.72, 8.07)   |
| Ever (not current)                              | 65.06                             | 2.69*     | (2.19, 3.31) | 1.19             | (0.89, 1.59) | 81.36                               | 22.69*    | (17.53, 29.37)  | 6.93*            | (5.02, 9.57)   |
| Current                                         | 79.60                             | 5.60*     | (4.01, 7.81) | 1.58             | (1.00, 2.49) | 90.80                               | 51.58*    | (32.64, 81.51)  | 10.53*           | (5.92, 18.71)  |
| <b>E-cigarette user</b>                         |                                   |           |              |                  |              |                                     |           |                 |                  |                |
| Never (unsusceptible)                           | 33.43                             | Reference |              | Reference        |              | 4.64                                | Reference |                 | Reference        |                |
| Never (susceptible)                             | 43.12                             | 1.60*     | (1.27, 2.03) | 1.28             | (0.95, 1.73) | 63.42                               | 36.41*    | (24.52, 54.07)  | 12.18*           | (7.79, 19.03)  |
| Ever (not current)                              | 55.94                             | 2.51*     | (2.03, 3.09) | 1.65*            | (1.23, 2.21) | 61.34                               | 38.66*    | (26.34, 57.75)  | 11.08*           | (7.07, 17.37)  |
| Current                                         | 72.41                             | 4.67*     | (3.73, 5.86) | 2.10*            | (1.47, 2.99) | 78.73                               | 124.45*   | (82.40, 187.94) | 21.87*           | (13.02, 36.71) |
| <b>Alcohol</b>                                  |                                   |           |              |                  |              |                                     |           |                 |                  |                |
| Never                                           | 35.34                             | Reference |              | Reference        |              | 20.56                               | Reference |                 | Reference        |                |
| Ever (not current)                              | 46.25                             | 1.65*     | (1.34, 2.03) | 1.25             | (0.97, 1.60) | 52.41                               | 4.18*     | (3.33, 5.26)    | 1.73*            | (1.25, 2.41)   |
| Current (no binge)                              | 57.84                             | 2.44*     | (1.96, 3.05) | 1.28             | (0.95, 1.71) | 65.68                               | 8.78*     | (6.81, 11.32)   | 1.49*            | (1.03, 2.17)   |
| Current (binge)                                 | 76.83                             | 5.27*     | (4.07, 6.82) | 1.84*            | (1.28, 2.65) | 75.36                               | 17.99*    | (13.41, 24.15)  | 1.65*            | (1.04, 2.60)   |
| <b>Marijuana</b>                                |                                   |           |              |                  |              |                                     |           |                 |                  |                |
| Never                                           | 49.43                             | Reference |              | Reference        |              | 48.40                               | Reference |                 | Reference        |                |
| Ever (not current)                              | 77.97                             | 3.49*     | (2.42, 5.04) | 1.50             | (0.97, 2.32) | 85.88                               | 6.79*     | (4.40, 10.46)   | 1.61             | (0.94, 2.75)   |
| Current                                         | 81.55                             | 4.03*     | (2.42, 6.71) | 1.48             | (0.82, 2.67) | 93.20                               | 16.78*    | (7.72, 36.49)   | 3.49*            | (1.40, 8.72)   |
| <b>Internet cigarette ad exposure</b>           |                                   |           |              |                  |              |                                     |           |                 |                  |                |
| Never                                           | 44.74                             | Reference |              | Reference        |              | 38.78                               | Reference |                 | Reference        |                |
| Rarely/sometimes                                | 55.19                             | 1.66*     | (1.40, 1.96) | 1.07             | (0.86, 1.34) | 58.64                               | 2.22*     | (1.88, 2.62)    | 1.40*            | (1.06, 1.84)   |
| Mostly/always                                   | 63.01                             | 2.44*     | (1.87, 3.19) | 1.08             | (0.75, 1.57) | 64.78                               | 2.87*     | (2.20, 3.73)    | 1.52             | (0.97, 2.40)   |
| <b>Internet e-cigarette ad exposure</b>         |                                   |           |              |                  |              |                                     |           |                 |                  |                |
| Never                                           | 39.70                             | Reference |              | Reference        |              | 35.38                               | Reference |                 | Reference        |                |
| Rarely/sometimes                                | 55.47                             | 2.00*     | (1.68, 2.38) | 1.39*            | (1.10, 1.75) | 57.11                               | 2.43*     | (2.05, 2.89)    | 1.05             | (0.78, 1.41)   |
| Mostly/always                                   | 66.12                             | 3.33*     | (2.62, 4.22) | 1.76*            | (1.26, 2.46) | 69.12                               | 4.05*     | (3.19, 5.13)    | 0.86             | (0.57, 1.30)   |
| <b>Family member smokes cigarettes</b>          |                                   |           |              |                  |              |                                     |           |                 |                  |                |
| No                                              | 45.78                             | Reference |              | Reference        |              | 46.13                               | Reference |                 | Reference        |                |
| Yes                                             | 64.36                             | 2.14*     | (1.82, 2.51) | 1.31*            | (1.07, 1.60) | 63.80                               | 2.08*     | (1.78, 2.44)    | 1.17             | (0.91, 1.50)   |
| <b>Family member smokes e-cigarettes</b>        |                                   |           |              |                  |              |                                     |           |                 |                  |                |
| No                                              | 47.96                             | Reference |              | Reference        |              | 48.76                               | Reference |                 | Reference        |                |
| Yes                                             | 69.28                             | 2.17*     | (1.78, 2.64) | 1.25             | (0.98, 1.59) | 66.39                               | 2.25*     | (1.85, 2.73)    | 1.08             | (0.81, 1.45)   |
| <b>Family member uses HTP</b>                   |                                   |           |              |                  |              |                                     |           |                 |                  |                |

|    |                                         |             |           |               |                        |               |             |           |               |                        |               |
|----|-----------------------------------------|-------------|-----------|---------------|------------------------|---------------|-------------|-----------|---------------|------------------------|---------------|
| 1  | No                                      | 49.98       | Reference |               | Reference              |               | 51.18       | Reference |               | Reference              |               |
| 2  | Yes                                     | 67.85       | 2.08*     | (1.65, 2.62)  | 1.60*                  | (1.22, 2.09)  | 60.51       | 1.48*     | (1.19, 1.84)  | 0.98                   | (0.71, 1.36)  |
| 3  | Friend smokes cigarettes                |             |           |               |                        |               |             |           |               |                        |               |
| 4  | No                                      | 43.72       | Reference |               | Reference              |               | 40.50       | Reference |               | Reference              |               |
| 5  | Yes                                     | 59.81       | 1.89*     | (1.62, 2.20)  | 1.03                   | (0.83, 1.29)  | 62.56       | 2.50*     | (2.14, 2.91)  | 0.91                   | (0.70, 1.19)  |
| 6  | Friend uses e-cigarettes                |             |           |               |                        |               |             |           |               |                        |               |
| 7  | No                                      | 39.71       | Reference |               | Reference              |               | 38.98       | Reference |               | Reference              |               |
| 8  | Yes                                     | 59.80       | 1.96*     | (1.67, 2.31)  | 0.72*                  | (0.57, 0.91)  | 60.17       | 2.75*     | (2.33, 3.25)  | 0.70*                  | (0.51, 0.95)  |
| 9  | Friend uses HTP                         |             |           |               |                        |               |             |           |               |                        |               |
| 10 | No                                      | 48.05       | Reference |               | Reference              |               | 49.90       | Reference |               | Reference              |               |
| 11 | Yes                                     | 77.73       | 4.19*     | (3.27, 5.38)  | 4.15*                  | (3.11, 5.55)  | 66.43       | 1.98*     | (1.59, 2.47)  | 1.83*                  | (1.31, 2.57)  |
| 12 | <b>Constructed scales (score range)</b> | <b>Mean</b> | <b>OR</b> | <b>CI 95%</b> | <b>AOR<sup>B</sup></b> | <b>CI 95%</b> | <b>Mean</b> | <b>OR</b> | <b>CI 95%</b> | <b>AOR<sup>B</sup></b> | <b>CI 95%</b> |
| 13 | Sensation seeking (1-4)                 | 2.87        | 1.61*     | (1.44, 1.80)  | 1.08                   | (0.95, 1.24)  | 2.97        | 2.47*     | (2.20, 2.78)  | 1.41*                  | (1.19, 1.68)  |
| 14 | Technophilia (0-7)                      | 5.85        | 1.29*     | (1.19, 1.41)  | 1.07                   | (0.97, 1.19)  | 5.82        | 1.29*     | (1.18, 1.40)  | 1.04                   | (0.91, 1.20)  |
| 15 | Family affluent scale (0-9)             | 7.46        | 1.15*     | (1.09, 1.21)  | 1.10*                  | (1.04, 1.17)  | 7.29        | 1.04      | (0.99, 1.09)  | 0.94                   | (0.88, 1.02)  |

<sup>A</sup> All models include a random intercept for each participant to account for school-clustering

<sup>B</sup> Adjusted models are adjusted for all independent variables

\* Significant at  $\alpha = 0.05$

Table 3. Crude and adjusted odds ratios for ever and current HTP use among Guatemalan youth<sup>A</sup>

|                                          | Ever HTP use (not current)<br>N = 241 (8.6%) |                    |           |                  |           | Current HTP use<br>N = 84 (2.9%) |                    |           |                  |           |                 |
|------------------------------------------|----------------------------------------------|--------------------|-----------|------------------|-----------|----------------------------------|--------------------|-----------|------------------|-----------|-----------------|
|                                          | %                                            | OR                 | CI 95%    | AOR <sup>B</sup> | CI 95%    | %                                | OR                 | CI 95%    | AOR <sup>B</sup> | CI 95%    |                 |
| <b>Socio-demographic characteristics</b> |                                              |                    |           |                  |           |                                  |                    |           |                  |           |                 |
| Sex                                      |                                              |                    |           |                  |           |                                  |                    |           |                  |           |                 |
| 22                                       | Female                                       | 7.56               | Reference |                  | Reference |                                  | 2.63               | Reference |                  | Reference |                 |
| 23                                       | Male                                         | 9.75               | 1.40*     | (1.07, 1.84)     | 1.22      | (0.86, 1.72)                     | 3.42               | 1.31      | (0.84, 2.06)     | 1.03      | (0.56, 1.89)    |
| 24                                       | Age (Mean) <sup>A</sup>                      | 15.87 <sup>A</sup> | 1.72*     | (1.53, 1.94)     | 1.20      | (0.97, 1.50)                     | 15.65 <sup>A</sup> | 1.39      | (1.16, 1.65)     | 0.85      | (0.58, 1.25)    |
| Grade - USA categories                   |                                              |                    |           |                  |           |                                  |                    |           |                  |           |                 |
| 25                                       | Basico (grades 8-9)                          | 3.77               | Reference |                  | Reference |                                  | 1.43               | Reference |                  | Reference |                 |
| 26                                       | Bachillerato (grades 10-12)                  | 12.44              | 3.45*     | (2.47, 4.82)     | 0.92      | (0.49, 1.71)                     | 4.45               | 2.86*     | (1.69, 4.83)     | 2.18      | (0.68, 6.96)    |
| School performance                       |                                              |                    |           |                  |           |                                  |                    |           |                  |           |                 |
| 27                                       | < 80%                                        | 11.78              | Reference |                  | Reference |                                  | 4.54               | Reference |                  | Reference |                 |
| 28                                       | 80-89%                                       | 10.07              | 0.71      | (0.50, 1.01)     | 1.04      | (0.67, 1.63)                     | 3.36               | 0.69      | (0.41, 1.17)     | 0.74      | (0.36, 1.52)    |
| 29                                       | 90-100%                                      | 5.24               | 0.29*     | (0.19, 0.45)     | 0.69      | (0.38, 1.25)                     | 1.81               | 0.38*     | (0.20, 0.72)     | 0.84      | (0.35, 2.00)    |
| Parents' highest educational attainment  |                                              |                    |           |                  |           |                                  |                    |           |                  |           |                 |
| 30                                       | Secondary school or less                     | 16.67              | Reference |                  | Reference |                                  | 2.44               | Reference |                  | Reference |                 |
| 31                                       | High school or technical school              | 10.90              | 0.63      | (0.28, 1.43)     | 0.50      | (0.18, 1.69)                     | 2.92               | 1.37      | (0.18, 10.70)    | 0.62      | (0.07, 5.60)    |
| 32                                       | University or more                           | 8.12               | 0.48      | (0.22, 1.04)     | 0.36      | (0.12, 1.07)                     | 3.29               | 1.52      | (0.21, 11.25)    | 0.63      | (0.07, 5.51)    |
| 33                                       | Missing                                      | 5.15               | 0.27*     | (0.09, 0.80)     | 0.28      | (0.06, 1.37)                     | 0.77               | 0.72      | (0.06, 8.11)     | 0.00      | NA              |
| <b>Substance use variables</b>           |                                              |                    |           |                  |           |                                  |                    |           |                  |           |                 |
| Cigarette smoker <sup>C</sup>            |                                              |                    |           |                  |           |                                  |                    |           |                  |           |                 |
| 35                                       | Never (unsusceptible)                        | 1.75               | Reference |                  | Reference |                                  |                    |           |                  |           |                 |
| 36                                       | Never (susceptible)                          | 4.59               | 2.76*     | (1.60, 4.76)     | 1.34      | (0.69, 2.61)                     |                    |           |                  |           |                 |
| 37                                       | Ever (not current)                           | 18.37              | 12.70*    | (7.92, 20.36)    | 3.73*     | (2.03, 6.82)                     | 1.59               | Reference |                  | Reference |                 |
| 38                                       | Current                                      | 37.98              | 34.93*    | (21.01, 58.08)   | 6.63*     | (3.20, 13.74)                    | 24.56              | 13.81*    | (8.79, 21.68)    | 3.90*     | (1.90, 8.02)    |
| E-cigarette user <sup>C</sup>            |                                              |                    |           |                  |           |                                  |                    |           |                  |           |                 |
| 39                                       | Never (unsusceptible)                        | 0.42               | Reference |                  | Reference |                                  |                    |           |                  |           |                 |
| 40                                       | Never (susceptible)                          | 0.55               | 1.31      | (0.26, 6.49)     | 0.71      | (0.13, 3.92)                     |                    |           |                  |           |                 |
| 41                                       | Ever (not current)                           | 11.19              | 29.66*    | (9.37, 93.89)    | 9.31*     | (2.61, 33.23)                    | 0.25               | Reference |                  | Reference |                 |
| 42                                       | Current                                      | 20.00              | 59.31*    | (18.84, 186.69)  | 10.40*    | (2.75, 39.17)                    | 11.73              | 45.24*    | (19.32, 105.94)  | 46.12*    | (16.15, 131.74) |
| Alcohol <sup>D</sup>                     |                                              |                    |           |                  |           |                                  |                    |           |                  |           |                 |
| 43                                       | Never                                        | 1.47               | Reference |                  | Reference |                                  |                    |           |                  |           |                 |

|    |                                         |             |           |                |                        |               |             |           |               |                        |                |
|----|-----------------------------------------|-------------|-----------|----------------|------------------------|---------------|-------------|-----------|---------------|------------------------|----------------|
| 1  | Ever (not current)                      | 4.22        | 2.96*     | (1.47, 5.97)   | 1.14                   | (0.50, 2.60)  |             |           |               |                        |                |
| 2  | Current (no binge)                      | 8.18        | 5.99*     | (3.02, 11.87)  | 1.19                   | (0.52, 2.75)  | 1.73        | Reference |               | Reference              |                |
| 3  | Current (binge)                         | 26.25       | 23.92*    | (12.43, 46.03) | 2.53*                  | (1.08, 5.95)  | 10.12       | 4.55*     | (2.94, 7.06)  | 0.53                   | (0.27, 1.06)   |
| 4  | Marijuana                               |             |           |                |                        |               |             |           |               |                        |                |
| 5  | Never                                   | 6.07        | Reference |                | Reference              |               | 1.74        | Reference |               | Reference              |                |
| 6  | Ever (not current)                      | 29.03       | 6.18*     | (4.20, 9.09)   | 1.37                   | (0.84, 2.22)  | 16.67       | 8.54*     | (5.03, 14.51) | 1.91                   | (0.87, 4.18)   |
| 7  | Current                                 | 45.98       | 12.57*    | (7.93, 19.93)  | 2.29*                  | (1.27, 4.13)  | 25.40       | 10.64*    | (5.77, 19.60) | 1.32                   | (0.50, 3.45)   |
| 8  | Internet cigarette ad exposure          |             |           |                |                        |               |             |           |               |                        |                |
| 9  | Never                                   | 6.54        | Reference |                | Reference              |               | 1.85        | Reference |               | Reference              |                |
| 10 | Rarely/sometimes                        | 8.88        | 1.46*     | (1.07, 2.00)   | 1.13                   | (0.74, 1.75)  | 3.12        | 1.60      | (0.92, 2.78)  | 1.27                   | (0.55, 2.90)   |
| 11 | Mostly/always                           | 14.33       | 2.56*     | (1.69, 3.88)   | 1.50                   | (0.81, 2.77)  | 6.88        | 3.37*     | (1.75, 6.51)  | 2.65                   | (0.91, 7.71)   |
| 12 | Internet e-cigarette ad exposure        |             |           |                |                        |               |             |           |               |                        |                |
| 13 | Never                                   | 5.45        | Reference |                | Reference              |               | 2.04        | Reference |               | Reference              |                |
| 14 | Rarely/sometimes                        | 8.09        | 1.54*     | (1.08, 2.18)   | 0.67                   | (0.41, 1.09)  | 2.73        | 1.37      | (0.77, 2.45)  | 0.49                   | (0.20, 1.18)   |
| 15 | Mostly/always                           | 16.41       | 3.61*     | (2.45, 5.31)   | 0.98                   | (0.54, 1.77)  | 6.52        | 2.95*     | (1.59, 5.47)  | 0.40                   | (0.14, 1.13)   |
| 16 | Family member smokes cigarettes         |             |           |                |                        |               |             |           |               |                        |                |
| 17 | No                                      | 5.28        | Reference |                | Reference              |               | 2.07        | Reference |               | Reference              |                |
| 18 | Yes                                     | 14.88       | 3.10*     | (2.36, 4.07)   | 1.70*                  | (1.19, 2.45)  | 5.01        | 2.28*     | (1.47, 3.54)  | 2.00*                  | (1.03, 3.88)   |
| 19 | Family member smokes e-cigarettes       |             |           |                |                        |               |             |           |               |                        |                |
| 20 | No                                      | 6.58        | Reference |                | Reference              |               | 2.42        | Reference |               | Reference              |                |
| 21 | Yes                                     | 16.49       | 2.64*     | (1.98, 3.51)   | 1.37                   | (0.94, 2.01)  | 5.74        | 2.19*     | (1.39, 3.46)  | 0.74                   | (0.38, 1.46)   |
| 22 | Family member uses HTP                  |             |           |                |                        |               |             |           |               |                        |                |
| 23 | No                                      | 8.09        | Reference |                | Reference              |               | 2.86        | Reference |               | Reference              |                |
| 24 | Yes                                     | 12.40       | 1.58*     | (1.13, 2.23)   | 0.90                   | (0.58, 1.42)  | 4.60        | 1.49      | (0.86, 2.60)  | 1.08                   | (0.50, 2.33)   |
| 25 | Friend smokes cigarettes                |             |           |                |                        |               |             |           |               |                        |                |
| 26 | No                                      | 4.77        | Reference |                | Reference              |               | 1.12        | Reference |               | Reference              |                |
| 27 | Yes                                     | 12.07       | 2.71*     | (2.01, 3.66)   | 0.77                   | (0.50, 1.18)  | 4.89        | 4.03*     | (2.29, 7.07)  | 0.83                   | (0.38, 1.82)   |
| 28 | Friend uses e-cigarettes                |             |           |                |                        |               |             |           |               |                        |                |
| 29 | No                                      | 3.97        | Reference |                | Reference              |               | 0.60        | Reference |               | Reference              |                |
| 30 | Yes                                     | 10.22       | 2.93*     | (2.06, 4.18)   | 0.51*                  | (0.30, 0.86)  | 4.63        | 6.52*     | (3.00, 14.19) | 0.61                   | (0.21, 1.77)   |
| 31 | Friend uses HTP                         |             |           |                |                        |               |             |           |               |                        |                |
| 32 | No                                      | 6.72        | Reference |                | Reference              |               | 1.19        | Reference |               | Reference              |                |
| 33 | Yes                                     | 21.14       | 3.98*     | (2.94, 5.39)   | 7.28*                  | (4.64, 11.43) | 15.65       | 12.40*    | (7.81, 19.71) | 21.06*                 | (11.13, 39.85) |
| 34 | <b>Constructed scales (score range)</b> | <b>Mean</b> | <b>OR</b> | <b>CI 95%</b>  | <b>AOR<sup>B</sup></b> | <b>CI 95%</b> | <b>Mean</b> | <b>OR</b> | <b>CI 95%</b> | <b>AOR<sup>B</sup></b> | <b>CI 95%</b>  |
| 35 | Sensation seeking (1-4)                 | 3.10        | 2.46*     | (1.97, 3.07)   | 1.27                   | (0.96, 1.68)  | 3.25        | 3.34*     | (2.26, 4.92)  | 1.34                   | (0.80, 2.27)   |
| 36 | Technophilia (0-7)                      | 5.96        | 1.40*     | (1.18, 1.67)   | 1.12                   | (0.89, 1.40)  | 6.11        | 1.81*     | (1.32, 2.48)  | 1.34                   | (0.90, 2.00)   |
| 37 | Family affluent scale (0-9)             | 7.64        | 1.18*     | (1.07, 1.30)   | 1.15*                  | (1.02, 1.31)  | 7.63        | 1.18*     | (1.01, 1.38)  | 1.04                   | (0.84, 1.29)   |

<sup>A</sup> All models include a random intercept for each participant to account for school-clustering

<sup>B</sup> Adjusted models are adjusted for all independent variables

<sup>C</sup> Due to low counts, for current use models, cigarette and e-cigarette use was combined to current user versus non-current user

<sup>D</sup> Due to low counts, alcohol use was combined to non-binge versus binge in last month

\* Significant at  $\alpha = 0.05$

STROBE Statement—Checklist of items that should be included in reports of *cross-sectional studies*

|                              | Item No | Recommendation                                                                                                                                                                                               | Page No |
|------------------------------|---------|--------------------------------------------------------------------------------------------------------------------------------------------------------------------------------------------------------------|---------|
| <b>Title and abstract</b>    | 1       | (a) Indicate the study's design with a commonly used term in the title or the abstract                                                                                                                       | 1       |
|                              |         | (b) Provide in the abstract an informative and balanced summary of what was done and what was found                                                                                                          | 2       |
| <b>Introduction</b>          |         |                                                                                                                                                                                                              |         |
| Background/rationale         | 2       | Explain the scientific background and rationale for the investigation being reported                                                                                                                         | 4       |
| Objectives                   | 3       | State specific objectives, including any prespecified hypotheses                                                                                                                                             | 6       |
| <b>Methods</b>               |         |                                                                                                                                                                                                              |         |
| Study design                 | 4       | Present key elements of study design early in the paper                                                                                                                                                      | 6       |
| Setting                      | 5       | Describe the setting, locations, and relevant dates, including periods of recruitment, exposure, follow-up, and data collection                                                                              | 6       |
| Participants                 | 6       | (a) Give the eligibility criteria, and the sources and methods of selection of participants                                                                                                                  | 6       |
| Variables                    | 7       | Clearly define all outcomes, exposures, predictors, potential confounders, and effect modifiers. Give diagnostic criteria, if applicable                                                                     | 7       |
| Data sources/<br>measurement | 8*      | For each variable of interest, give sources of data and details of methods of assessment (measurement). Describe comparability of assessment methods if there is more than one group                         | 9       |
| Bias                         | 9       | Describe any efforts to address potential sources of bias                                                                                                                                                    | NA      |
| Study size                   | 10      | Explain how the study size was arrived at                                                                                                                                                                    | NA      |
| Quantitative variables       | 11      | Explain how quantitative variables were handled in the analyses. If applicable, describe which groupings were chosen and why                                                                                 | 7       |
| Statistical methods          | 12      | (a) Describe all statistical methods, including those used to control for confounding                                                                                                                        | 9       |
|                              |         | (b) Describe any methods used to examine subgroups and interactions                                                                                                                                          | 9       |
|                              |         | (c) Explain how missing data were addressed                                                                                                                                                                  | 9       |
|                              |         | (d) If applicable, describe analytical methods taking account of sampling strategy                                                                                                                           | NA      |
|                              |         | (e) Describe any sensitivity analyses                                                                                                                                                                        | NA      |
| <b>Results</b>               |         |                                                                                                                                                                                                              |         |
| Participants                 | 13*     | (a) Report numbers of individuals at each stage of study—eg numbers potentially eligible, examined for eligibility, confirmed eligible, included in the study, completing follow-up, and analysed            | 9       |
|                              |         | (b) Give reasons for non-participation at each stage                                                                                                                                                         | 9       |
|                              |         | (c) Consider use of a flow diagram                                                                                                                                                                           | NA      |
| Descriptive data             | 14*     | (a) Give characteristics of study participants (eg demographic, clinical, social) and information on exposures and potential confounders                                                                     | 10      |
|                              |         | (b) Indicate number of participants with missing data for each variable of interest                                                                                                                          | 10      |
| Outcome data                 | 15*     | Report numbers of outcome events or summary measures                                                                                                                                                         | 10      |
| Main results                 | 16      | (a) Give unadjusted estimates and, if applicable, confounder-adjusted estimates and their precision (eg, 95% confidence interval). Make clear which confounders were adjusted for and why they were included | 10      |

|                          |    |                                                                                                                                                                            |    |
|--------------------------|----|----------------------------------------------------------------------------------------------------------------------------------------------------------------------------|----|
|                          |    | (b) Report category boundaries when continuous variables were categorized                                                                                                  | 10 |
|                          |    | (c) If relevant, consider translating estimates of relative risk into absolute risk for a meaningful time period                                                           | NA |
| Other analyses           | 17 | Report other analyses done—eg analyses of subgroups and interactions, and sensitivity analyses                                                                             | NA |
| <b>Discussion</b>        |    |                                                                                                                                                                            |    |
| Key results              | 18 | Summarise key results with reference to study objectives                                                                                                                   | 12 |
| Limitations              | 19 | Discuss limitations of the study, taking into account sources of potential bias or imprecision. Discuss both direction and magnitude of any potential bias                 | 14 |
| Interpretation           | 20 | Give a cautious overall interpretation of results considering objectives, limitations, multiplicity of analyses, results from similar studies, and other relevant evidence | 14 |
| Generalisability         | 21 | Discuss the generalisability (external validity) of the study results                                                                                                      | 14 |
| <b>Other information</b> |    |                                                                                                                                                                            |    |
| Funding                  | 22 | Give the source of funding and the role of the funders for the present study and, if applicable, for the original study on which the present article is based              | 16 |

\*Give information separately for exposed and unexposed groups.

**Note:** An Explanation and Elaboration article discusses each checklist item and gives methodological background and published examples of transparent reporting. The STROBE checklist is best used in conjunction with this article (freely available on the Web sites of PLoS Medicine at <http://www.plosmedicine.org/>, Annals of Internal Medicine at <http://www.annals.org/>, and Epidemiology at <http://www.epidem.com/>). Information on the STROBE Initiative is available at [www.strobe-statement.org](http://www.strobe-statement.org).

# BMJ Open

## A cross-sectional study on the awareness, susceptibility, and use of heated tobacco products among adolescents in Guatemala City, Guatemala

|                                 |                                                                                                                                                                                                                                                                                                                                                                                                                                                                                                                                                                                                                                                                                                                                                                                                                           |
|---------------------------------|---------------------------------------------------------------------------------------------------------------------------------------------------------------------------------------------------------------------------------------------------------------------------------------------------------------------------------------------------------------------------------------------------------------------------------------------------------------------------------------------------------------------------------------------------------------------------------------------------------------------------------------------------------------------------------------------------------------------------------------------------------------------------------------------------------------------------|
| Journal:                        | <i>BMJ Open</i>                                                                                                                                                                                                                                                                                                                                                                                                                                                                                                                                                                                                                                                                                                                                                                                                           |
| Manuscript ID                   | bmjopen-2020-039792.R2                                                                                                                                                                                                                                                                                                                                                                                                                                                                                                                                                                                                                                                                                                                                                                                                    |
| Article Type:                   | Original research                                                                                                                                                                                                                                                                                                                                                                                                                                                                                                                                                                                                                                                                                                                                                                                                         |
| Date Submitted by the Author:   | 20-Oct-2020                                                                                                                                                                                                                                                                                                                                                                                                                                                                                                                                                                                                                                                                                                                                                                                                               |
| Complete List of Authors:       | Gottschlich, Anna; The University of British Columbia, School of Population and Public Health; Universidad Rafael Landivar, Instituto de Investigación y Estudios Superiores en Ciencias de la Salud Mus, Sophia; Universidad Rafael Landivar, Instituto de Investigación y Estudios Superiores en Ciencias de la Salud Monzon, Jose Carlos; Universidad Rafael Landivar, Instituto de Investigación y Estudios Superiores en Ciencias de la Salud Thrasher, Jim; University of South Carolina, Department of Health Promotion, Education & Behavior; National Institute of Public Health, Center for Population Health Research Barnoya, Joaquin; Unidad de Cirugia Cardiovascular, Departamento de Investigacion; Universidad Rafael Landivar, Instituto de Investigación y Estudios Superiores en Ciencias de la Salud |
| <b>Primary Subject Heading</b>: | Smoking and tobacco                                                                                                                                                                                                                                                                                                                                                                                                                                                                                                                                                                                                                                                                                                                                                                                                       |
| Secondary Subject Heading:      | Global health, Public health, Smoking and tobacco                                                                                                                                                                                                                                                                                                                                                                                                                                                                                                                                                                                                                                                                                                                                                                         |
| Keywords:                       | EPIDEMIOLOGY, PUBLIC HEALTH, Community child health < PAEDIATRICS                                                                                                                                                                                                                                                                                                                                                                                                                                                                                                                                                                                                                                                                                                                                                         |
|                                 |                                                                                                                                                                                                                                                                                                                                                                                                                                                                                                                                                                                                                                                                                                                                                                                                                           |

SCHOLARONE™  
Manuscripts



I, the Submitting Author has the right to grant and does grant on behalf of all authors of the Work (as defined in the below author licence), an exclusive licence and/or a non-exclusive licence for contributions from authors who are: i) UK Crown employees; ii) where BMJ has agreed a CC-BY licence shall apply, and/or iii) in accordance with the terms applicable for US Federal Government officers or employees acting as part of their official duties; on a worldwide, perpetual, irrevocable, royalty-free basis to BMJ Publishing Group Ltd ("BMJ") its licensees and where the relevant Journal is co-owned by BMJ to the co-owners of the Journal, to publish the Work in this journal and any other BMJ products and to exploit all rights, as set out in our [licence](#).

The Submitting Author accepts and understands that any supply made under these terms is made by BMJ to the Submitting Author unless you are acting as an employee on behalf of your employer or a postgraduate student of an affiliated institution which is paying any applicable article publishing charge ("APC") for Open Access articles. Where the Submitting Author wishes to make the Work available on an Open Access basis (and intends to pay the relevant APC), the terms of reuse of such Open Access shall be governed by a Creative Commons licence – details of these licences and which [Creative Commons](#) licence will apply to this Work are set out in our licence referred to above.

Other than as permitted in any relevant BMJ Author's Self Archiving Policies, I confirm this Work has not been accepted for publication elsewhere, is not being considered for publication elsewhere and does not duplicate material already published. I confirm all authors consent to publication of this Work and authorise the granting of this licence.



1  
2  
3 A cross-sectional study on the awareness, susceptibility, and use of heated  
4 tobacco products among adolescents in Guatemala City, Guatemala  
5  
6  
7

8 Anna Gottschlich<sup>1,2</sup>, Sophia Mus<sup>1</sup>, Jose Carlos Monzon<sup>1</sup>, James F. Thrasher<sup>3,4</sup>, Joaquin  
9 Barnoya<sup>1,5</sup>  
10

- 11 1. Instituto de Investigación y Estudios Superiores en Ciencias de la Salud, Universidad Rafael Landivar,  
12 Guatemala  
13 2. School of Population and Public Health, University of British Columbia, Vancouver, British Columbia,  
14 Canada  
15 3. Department of Health Promotion, Education & Behavior, Arnold School of Public Health, University of  
16 South Carolina, Columbia, South Carolina, USA  
17 4. Center for Population Health Research, National Institute of Public Health, Cuernavaca, Mexico  
18 5. Unidad de Cirugía Cardiovascular de Guatemala, Guatemala City, Guatemala  
19  
20  
21  
22  
23  
24  
25  
26  
27  
28  
29  
30  
31

32 Corresponding Author:  
33 Dr. Anna Gottschlich  
34 Global Control of HPV Related Diseases  
35 BC Women's Hospital and Health Centre  
36 Room H203 – 4500 Oak Street (Box 42)  
37 Vancouver, BC V6H 3N1  
38 Phone: +604 649-6044  
39 E-mail: annagott@umich.edu  
40 ORCID ID: 0000-0002-3095-2323  
41  
42  
43  
44  
45  
46  
47  
48  
49

50 Abstract: 299; Words: 4107; Tables: 3; Figures: 0; References: 44  
51  
52  
53  
54  
55  
56  
57  
58  
59  
60

## Abstract

*Objectives:* Heated tobacco products (HTPs) are increasingly marketed worldwide, yet limited research on HTPs has been conducted in low- and middle-income countries (LMICs) or amongst adolescents. Guatemala is one of the few LMICs where HTPs are available. This study examined prevalence and correlates of HTP awareness, susceptibility, and use among adolescents in Guatemala.

*Design, Setting, and Participants:* A cross-sectional survey on HTP awareness, susceptibility, and use was conducted among 2870 students between the ages of 13-17 in private schools in Guatemala City, Guatemala.

*Primary and secondary outcome measures:* The primary outcome was susceptibility to future use of HTP among school-aged current and never-smokers in Guatemala. We also explored awareness and use of HTPs. Multivariate binomial regression models were used to explore associations between these outcomes and both sociodemographic factors and established smoking correlates.

*Results:* Of all students (n=2870), about half were aware of HTPs (52.4%) and susceptible to future or continued use (52.4%). Whereas 8.4% of students had tried HTPs in the lifetime (but not in the last month), only 2.9% used HTPs in the past month. Independent correlates of HTP susceptibility and use included: use of other tobacco products (current smoking: AOR=10.53 & 34.93, respectively; current e-cigarette use: AOR=21.87 & 59.31, respectively), moderate alcohol consumption (AOR=1.49 & 5.99, respectively), marijuana use in the past 30 days (AOR=3.49 & 12.57, respectively), and having friends who use HTPs (AOR = 1.83 & 44.72, respectively).

1  
2  
3 *Conclusions:* Among this sample of adolescents in Guatemala City, where tobacco  
4 control is weak, the prevalence of HTP use was low but susceptibility to future use was  
5 high. Tobacco prevention and intervention strategies for cigarettes and e-cigarettes  
6 should now also include HTPs, which tend to be used by similar adolescent populations  
7 (i.e. those who use other substances or are exposed to tobacco through family and  
8 friends).  
9  
10  
11  
12  
13  
14  
15  
16  
17  
18  
19  
20  
21  
22  
23  
24  
25  
26  
27  
28  
29  
30  
31  
32  
33  
34  
35  
36  
37  
38  
39  
40  
41  
42  
43  
44  
45  
46  
47  
48  
49  
50  
51  
52  
53  
54  
55  
56  
57  
58  
59  
60

**Strengths and Limitations:**

- HTPs are increasingly popular in countries where available, but little is known about adolescent use in LMICs with weak tobacco control policies like Guatemala.
- The study sample was selected from private high school students in Guatemala City, specifically to oversample potential HTP users but also resulted in a population not generalizable nationwide.
- This study used a previously fielded questionnaire adapted to Guatemala, and research questions, outcomes, and analysis were based on prior local work.
- Both the population of interest and public were involved in study design and implementation: a subset of students were asked to pilot and comment on the survey before implementation, participating schools were asked to review the protocol, and the Ministry of Health gave support of this study with the understanding that results will be shared and used to support tobacco control strategies.
- The data is self-reported, thus there is a chance of misreporting, particularly underreporting due to social desirability bias.

## Introduction

The increase in popularity of non-conventional tobacco products has further complicated an already challenging tobacco control landscape. For example, electronic cigarettes (e-cigarettes) increasingly appear more appealing to adolescents than conventional cigarettes; a considerable proportion of adolescent e-cigarette users have never smoked conventional cigarettes.[1,2] The appeal of e-cigarettes in younger populations is a key argument for strong regulations that would decrease youth access (e.g., increase price and legal age of purchase) and appeal (e.g., banning flavors and marketing), often outweighing arguments that policies should promote e-cigarette use among established smokers who may benefit from consumption of a less harmful product.[3] Recently, tobacco product regulation in some countries has been additionally complicated by the introduction of novel heated tobacco products (HTPs). HTPs heat but do not burn tobacco, producing an aerosol with nicotine that does not contain or has lower levels of many of the harmful chemicals in cigarette smoke.[4,5] However, current evidence on the harmful effects of HTPs compared to conventional cigarettes are yet to be determined as most of the available evidence is in vitro and comes from tobacco industry funded research.[6–9] In July of 2020, the FDA authorized Philip Morris to make claims in its HTP (IQOS) marketing about reduced exposure to harmful constituents compared to cigarettes; however, the FDA prohibited marketing claims about reduced risks from IQOS use, citing the lack of evidence for this claim.[10,11] Nevertheless, consumers equate reduced exposure with reduced risk[12], and HTPs appeal to adult smokers and use has been rapidly increasing in some high-income countries where they have been introduced, suggesting a potential public health benefit,

1  
2  
3 similar to that of e-cigarettes.[13–15] Nonetheless, the appeal of HTPs among  
4 adolescents, particularly those who would otherwise not use tobacco, is relatively  
5  
6 unknown.  
7  
8  
9

10 IQOS was introduced in some countries in 2014, and is advertised as a less  
11 harmful alternative for smokers who want to reduce exposure to harmful chemicals  
12 produced by tobacco combustion.[16] By 2020 it was available in at least 52 countries  
13 worldwide, including Guatemala[4,5,17] but, due to the fairly recent introduction to the  
14 market, little is known about its awareness and use, particularly among adolescents.  
15 Nonetheless, HTPs appear to quickly penetrate markets: for example, one study found  
16 that among young adults in South Korea, only 3 months after IQOS was introduced into  
17 the market, 38% were aware of the product and 3.5% were current users.[18]  
18  
19 Additionally, in 2018, a study of older adolescents (16-19 years old) in England, Canada  
20 and the USA (where HTPs were either only available in limited areas or not available at  
21 the time of the study) reported that among all participants, 7% were aware of IQOS, 45%  
22 susceptible to future use, and 38% interested in trying IQOS; these percentages were  
23 higher in the current smoker and e-cigarette user subpopulation.[19] Notably,  
24 susceptibility to IQOS use (25%) was higher than susceptibility to conventional cigarette  
25 use (19%) among never smokers or e-cigarette users, suggesting its potential appeal  
26 among adolescents who otherwise would not use tobacco products.[19]  
27  
28  
29  
30  
31  
32  
33  
34  
35  
36  
37  
38  
39  
40  
41  
42  
43  
44  
45  
46

47 To the best of our knowledge, only one study has reported rates of HTP use  
48 among adolescents: this study, from 2019, found that among 12- to 18-year-old South  
49 Koreans, ever use was 2.8%.[20] Studies among adults in high-income countries (HICs)  
50 have shown that HTP awareness and use tends to be higher among males, young adults,  
51  
52  
53  
54  
55  
56  
57  
58  
59  
60

1  
2  
3 cigarette and e-cigarette smokers, and smokers with intentions to quit – all consistent risk  
4 factors for e-cigarette use.[18,21,22] Although currently the correlates of HTP use among  
5 adolescents are relatively unknown, they may resemble those for e-cigarette use: male,  
6 current or ever smoker, having peers or parents who smoke, sensation seeking, and  
7  
8  
9  
10  
11  
12  
13  
14  
15  
16  
17  
18  
19  
20  
21  
22  
23  
24  
25  
26  
27  
28  
29  
30  
31  
32  
33  
34  
35  
36  
37  
38  
39  
40  
41  
42  
43  
44  
45  
46  
47  
48  
49  
50  
51  
52  
53  
54  
55  
56  
57  
58  
59  
60

cigarette and e-cigarette smokers, and smokers with intentions to quit – all consistent risk factors for e-cigarette use.[18,21,22] Although currently the correlates of HTP use among adolescents are relatively unknown, they may resemble those for e-cigarette use: male, current or ever smoker, having peers or parents who smoke, sensation seeking, and technophilia. Some of these factors are hypothesized to be related to e-cigarette use due to Jessor's Problem Behavior Theory, which hypothesizes that engaging in one risky behavior increases the likelihood of engagement in other risky behaviors.[23–27]

### *Study context:*

Guatemala is a middle-income country in Central America that signed and ratified the WHO's Framework Convention on Tobacco Control (FCTC) in 2005. However, as of 2020, the only FCTC recommended policy that has been implemented is smoke-free environments (Article 8), and this has been executed with poor enforcement.[28] In 2015, the prevalence of adolescent cigarette and e-cigarette use in Guatemala was approximately 13% and 5.5%, respectively.[29,30] There is no current data on HTP use among adolescents in Latin America, or any other LMIC. This study aims to address this gap by evaluating the prevalence and correlates of HTP awareness, susceptibility, and use among adolescents in Guatemala to inform prevention and intervention strategies to target those at highest risk for tobacco use, including use of cigarettes, e-cigarettes, and HTPs.

## **Methods**

### *Survey design and data*

1  
2  
3 Adolescents, grades 8-12, were recruited for this cross-sectional study. Based on  
4 the official list of private and public schools in Guatemala City, 30 private schools were  
5 conveniently selected from middle to high socioeconomic urban areas and sent invitation  
6 letters to participate in the study. Six of these schools declined, four of which enrolled  
7 only boys or girls and 14 did not respond, leaving 10 participating schools. While  
8 students in grades 8-11 were recruited from all participating schools, students in the 12<sup>th</sup>  
9 grade were only recruited from five of the 10 participating schools. We obtained both  
10 passive consent from parents (i.e. a consent letter was sent home with students and  
11 parents were able to opt their child out of the study by signing and returning the letter)  
12 and assent from participating students. All students in participating grades were invited  
13 to complete the survey and no incentive was given to the participants or schools. Data  
14 were collected between May and September of 2019, using a paper-based, self-  
15 administered, Spanish-language survey on socio-demographics and tobacco product  
16 susceptibility, use, and risk factors. The survey was previously fielded in Mexico and  
17 subsequently adapted for Guatemala and pre-tested to ensure comprehension.[23] This  
18 protocol was approved by the Institutional Ethics Committee of the Institute of Nutrition  
19 of Central America and Panama (INCAP) (approval number 087/2019).  
20  
21  
22  
23  
24  
25  
26  
27  
28  
29  
30  
31  
32  
33  
34  
35  
36  
37  
38  
39  
40  
41

#### 42 *Patient and public involvement*

43  
44 The research questions and outcome measures, including the study questionnaire,  
45 were based on our previous research on e-cigarettes in Guatemala and Mexico.[31] The  
46 instrument was piloted among Guatemalan adolescents from schools not included in the  
47 study sample to ensure comprehension and further edited by local researchers to fit the  
48 country-specific environment. Participating schools were involved prior to data  
49  
50  
51  
52  
53  
54  
55  
56  
57  
58  
59  
60



1  
2  
3 collection and asked to review the study protocol. Certain schools requested that the  
4  
5 study team include 12<sup>th</sup> graders along with the proposed younger grades in the study  
6  
7 sample, and this was accommodated by the study team. Schools were aware of the time  
8  
9 required to complete the survey and surveys were only conducted in the time and place  
10  
11 allocated by each school. Additionally, a letter of support from the Ministry of Health  
12  
13 National Commission for the Prevention and Control of Chronic Disease was obtained  
14  
15 prior to the start of the study. Results of this study will be shared with enrolled schools  
16  
17 and support will be granted to develop and tailor tobacco-use control strategies. Results  
18  
19 will also be disseminated to authorities and stakeholders for policy development.  
20  
21  
22  
23  
24  
25

### 26 *Outcome variables*

27  
28 We first assessed HTP awareness (yes, no) by showing an image and description  
29  
30 of an IQOS, the only HTP available Guatemala, and asking if they had previously heard  
31  
32 of them. Susceptibility to future HTP use was then assessed for all participants with a  
33  
34 single question adapted from Pierce et al.'s validated scale.[32] This question (prompt:  
35  
36 "If one of your friends offered you a heated tobacco product like IQOS, would you use  
37  
38 it?"; possible responses: "Definitely yes", "Probably yes", "Probably no", "Definitely  
39  
40 no") has been shown to predict smoking initiation with the same accuracy as the full  
41  
42 scale among Latin American youth.[33] Those who answered "Definitely yes", "Probably  
43  
44 yes", or "Probably no" were considered susceptible to continued or future use, while  
45  
46 those who reported "Definitely no" were categorized as unsusceptible, similar to prior  
47  
48 studies.[23] Students did not need to be previously aware of HTPs to be susceptible to  
49  
50 future use. Students were also asked if they had ever tried HTPs (yes, no) and, to assess  
51  
52  
53  
54  
55  
56  
57  
58  
59  
60

1  
2  
3 current use, if they had used HTPs in the prior 30 days. Using the above described  
4  
5 definitions, HTP use was characterized as the following four exclusive categories: never  
6  
7 used and unsusceptible to future use; never used but susceptible to future use; ever used,  
8  
9 but not currently; and current use.  
10  
11  
12  
13

### 14 *Independent variables*

15  
16 Sociodemographic variables that were assessed included sex (male, female), age  
17  
18 (continuous), grade (8<sup>th</sup>-9<sup>th</sup> vs 10<sup>th</sup>-12<sup>th</sup>), school performance (averaging < 80%, 80-89%,  
19  
20 or >90% ), highest educational attainment by either parent (primary school or less, high  
21  
22 school or technical school, university or more), and family affluence. To assess family  
23  
24 affluence, we used the 4-item Family Affluent Scale (FAS) (i.e., “How many cars does  
25  
26 your family have?”, “Do you have your own bedroom?”, “How many times did your  
27  
28 family go on vacation last year?” and “How many computers are in your house?”), which  
29  
30 is a summative measure validated among other adolescent populations.[34]  
31  
32  
33  
34

35  
36 Established risk factors for smoking and e-cigarette use were also considered,  
37  
38 including other substance use (e.g. tobacco products, alcohol, drugs). Use of cigarettes  
39  
40 and e-cigarettes were queried and derived consistent with our definition for HTP use  
41  
42 (never used and unsusceptible to future use; never used but susceptible to future use; ever  
43  
44 used, but not currently; and current use). Additionally, we assessed ever use of any  
45  
46 tobacco product (yes/no), first product used among ever-users (cigarette, e-cigarette,  
47  
48 HTP, other), and dual use of products (yes/no; if yes, which products). Ever use of  
49  
50 alcohol, current use (last 30 days), and recent binge drinking (4 or more drinks in one  
51  
52 sitting in the last 30 days) were assessed and used to derive exclusive categories. We  
53  
54  
55  
56  
57  
58  
59  
60

1  
2  
3 also considered ever and current marijuana use. Smoking, e-cigarette, and HTP use were  
4 measured separately for both family members (yes, no) and friends (yes, no among five  
5  
6 closest friends).  
7  
8  
9

10 Other common risk factors for smoking and vaping that were considered in this  
11 study included frequency of exposure to internet advertising (i.e., never;  
12 rarely/sometimes; often/very often) for both smoking and e-cigarettes, assessed  
13  
14 separately. Sensation seeking (in accordance with Jessor's Problem Behavior Theory)  
15 was evaluated with four items (i.e., "I would like to explore strange places", "I like to do  
16 things that scare me", "I like new and exciting experiences, even when I am breaking the  
17 rules", and "Sometimes I do crazy things just for fun") with Likert responses (1=strongly  
18 disagree; 5=strongly agree) and averaged together (alpha = 0.77). We also measured  
19 "technophilia", which is a positive orientation toward new technology adoption, using  
20 seven items that have been previously shown to independently predict e-cigarette, but not  
21 smoking, initiation (i.e., having internet access in their room; having a laptop in their  
22 room; owning a tablet; having a cellphone with internet access; frequency of using social  
23 media; enjoyment from using the internet; level of interest in new technologies).[35,36]  
24  
25  
26  
27  
28  
29  
30  
31  
32  
33  
34  
35  
36  
37  
38  
39  
40  
41  
42  
43

#### 44 *Statistical analysis*

45 Binary logistic regression was used to estimate crude odds ratios (OR) for the  
46 association between each independent variable and key outcomes: 1. HTP awareness  
47 (yes, no) among all participants; 2. Susceptibility to future HTP use (yes, no) among all  
48 participants; 3. Ever HTP use (yes, no) among non-current users; and 4. Current HTP use  
49 (yes, no) among all participants. A cut off of less than 5% missing was a necessary  
50  
51  
52  
53  
54  
55  
56  
57  
58  
59  
60

1  
2  
3 criterion for inclusion of each variable in the models. However, no variables had more  
4  
5 than 5% missing data, and thus all were included in the final analyses. Parent educational  
6  
7 attainment was borderline (4.8%) so a “missing” category was included for this variable.  
8  
9  
10 Due to the low prevalence of HTP use, particularly current use, categories of cigarette, e-  
11  
12 cigarette, and alcohol use were collapsed in some models to increase small cell counts.  
13  
14 In the current HTP use model, cigarette and e-cigarette use was collapsed to non-current  
15  
16 vs. current and alcohol was collapsed to non-recent-binge vs. recent-binge. Next, for  
17  
18 each outcome, multivariate logistic regression models were calculated to estimate the  
19  
20 adjusted ORs (AORs) associated with each independent variable, adjusting for all other  
21  
22 independent variables. Crude and adjusted models included a random intercept to adjust  
23  
24 for non-independence of observations within schools. In all models, we evaluated  
25  
26 collinearity among independent variables by examining the variance inflation factor, and  
27  
28 results indicated no collinearity concerns. Also, due to concern regarding the strong  
29  
30 influence of friend use of e-cigarettes, we re-ran the full models after removing this  
31  
32 variable and compared results with the original model. There were minimal differences  
33  
34 in the coefficients across models, and the direction, statistical significance, and  
35  
36 interpretation are the same across model specifications. Because of the importance of  
37  
38 peer influence for youth tobacco use, we report on the results from the original model that  
39  
40 includes the friend use of e-cigarettes variable. All analyses were conducted in R version  
41  
42  
43  
44  
45  
46  
47 3.4.4.  
48  
49  
50

## 51 **Results**

### 52 *Participants*

1  
2  
3 At the 10 schools, 3311 students were invited to participate and 2870 (87%)  
4  
5 completed the survey: 271 (8%) were absent, 135 (4%) did not have permission from  
6  
7 their parents, 28 (<1%) refused and 2 (<1%) did not speak Spanish. Five (<1%) students  
8  
9 who did not complete the survey gave no reason as to why they did not wish to  
10  
11 participate.  
12  
13

14  
15 About half of participants were male and the mean age was slightly over 15 years  
16  
17 (Table 1). Most respondents were in the higher grades (grades 10, 11, and 12) (56.9%),  
18  
19 had an average grade of 80% or higher (81.2%), and had at least one parent with a  
20  
21 university degree or higher (75%).  
22  
23

24 Over half (52.4%) of students reported having heard of HTPs and 8.4% and 2.9%  
25  
26 reported ever- (but not current) and current use of HTPs, respectively. In the entire  
27  
28 sample, 52% were susceptible to future HTP use. In this sample, 939 (32.7%) students  
29  
30 were both previously aware of HTPs and susceptible to future use, while 802 (27.9%)  
31  
32 were neither previously aware nor susceptible to future use. Furthermore, 563 (19.6%)  
33  
34 were previously aware but not susceptible, and 560 (19.5%) were not previously aware  
35  
36 but were susceptible. Over half (58.4%) had used a tobacco product at some point in  
37  
38 their life; most ever-tobacco users first used e-cigarettes (54.0%) or cigarettes (43.2%).  
39  
40 Only 1.5% of ever-tobacco users first used an HTP. Nearly half (44%) of students had  
41  
42 never smoked conventional cigarettes and were unsusceptible to future cigarette use, 30%  
43  
44 had tried smoking, and 9% were current smokers. Regarding e-cigarettes, 56% reported  
45  
46 ever-use and 28% currently use e-cigarettes. Of current tobacco users, the majority only  
47  
48 used e-cigarettes (65.9%) and only 0.5% currently used HTP but not cigarettes or e-  
49  
50  
51  
52  
53  
54  
55  
56  
57  
58  
59  
60 cigarettes.

1  
2  
3 Considering other substances, one quarter (24%) reported never consuming  
4 alcohol and 20% reported at least one instance of binge drinking in the past 30 days.  
5  
6 Most (90.2%) had never used marijuana. About 50% of students report seeing online  
7  
8 cigarette or e-cigarette advertising rarely or sometimes when they use the internet.  
9  
10 Family use of cigarettes, e-cigarettes, or HTPs was 35.8%, 21.0%, and 13.8%,  
11  
12 respectively. Concerning friend cigarette, e-cigarette, or HTP use, the corresponding  
13  
14 percentages were 54.1%, 63.6%, and 14.8%, respectively.  
15  
16  
17  
18  
19  
20  
21

### 22 *Factors associated with HTP awareness and susceptibility*

23  
24 About half (52.4%) of students reported awareness of HTPs. HTP awareness was  
25  
26 higher for ever- (AOR = 1.65, 95% CI = 1.23, 2.21) and current users of e-cigarettes  
27  
28 (AOR = 2.10, 95% CI = 1.47, 2.99), binge drinkers (AOR = 1.84, 95% CI = 1.28, 2.65)  
29  
30 and those exposed to medium (AOR = 1.39, 95% CI = 1.10, 1.75) and high levels of  
31  
32 online e-cigarette advertising (AOR = 1.76, 95% CI = 1.26, 2.46) (Table 2).  
33

34  
35 Additionally, family smoking (AOR = 1.31, 95% CI = 1.07, 1.60) and HTP use (AOR =  
36  
37 1.60, 95% CI = 1.22, 2.09), family affluence (AOR = 1.10, 95% CI = 1.04, 1.17), and  
38  
39 friend HTP use (AOR = 4.15, 95% CI = 3.11, 5.55) were positively associated with  
40  
41 participant HTP awareness.  
42  
43

44  
45 In the entire sample, 52.4% were susceptible to continued or future HTP use.  
46  
47 Compared to unsusceptible never-smokers, higher susceptibility was found among  
48  
49 susceptible never- (AOR = 6.18, 95% CI = 4.72, 8.07), ever- (AOR = 6.93, 95% CI =  
50  
51 5.02, 9.57), and current smokers (AOR = 10.53, 95% CI = 5.92, 18.71), as well as  
52  
53 susceptible never- (AOR = 12.18, 95% CI = 7.79, 19.03), ever- (AOR = 11.08, 95% CI =  
54  
55  
56  
57  
58  
59  
60

1  
2  
3 7.07, 17.37), and current e-cigarettes users (AOR = 21.87, 95% CI = 13.02, 36.71).  
4  
5 Similarly, ever- (AOR = 1.73, 95% CI = 1.25, 2.41), current (AOR = 1.49, 95% CI =  
6  
7 1.03, 2.17), and binge drinkers (AOR = 1.65, 95% CI = 1.04, 2.60), and current  
8  
9 marijuana users (AOR = 3.49, 95% CI = 1.40, 2.60) were more likely to be susceptible to  
10  
11 HTP use. Finally, having a friend who used HTPs (AOR = 1.83, 95% CI = 1.31, 2.57)  
12  
13 and higher sensation-seeking scores (AOR = 1.41, 95% CI = 1.19, 1.68) were positively  
14  
15 associated with HTP susceptibility.  
16  
17  
18  
19  
20  
21

### 22 *Factors associated with HTP use (ever and current)*

23  
24 Among non-current HTP users, 8.6% had tried HTPs. Students who were ever-  
25  
26 (AOR = 3.73, 95% CI = 2.03, 6.82) or current smokers (AOR = 6.63, 95% CI = 3.20,  
27  
28 13.74), or ever- (AOR = 9.31, 95% CI = 2.61, 33.23) or current e-cigarette users (AOR =  
29  
30 10.40, 95% CI = 2.75, 39.17) were more likely to be ever HTP users (Table 3). Those  
31  
32 who reported binge drinking (AOR = 2.53, 95% CI = 1.08, 5.95) and marijuana use  
33  
34 (AOR = 2.29, 95% CI = 1.27, 4.13) were also more likely to be ever-HTP users. Family  
35  
36 smoking (AOR = 1.70, 95% CI = 1.19, 2.45) and friend HTP use (AOR = 7.28, 95% CI =  
37  
38 4.64, 11.43) were associated with higher odds of ever use of HTPs. Higher family  
39  
40 affluence was also associated with ever use (AOR = 1.15, 95% CI = 1.02, 1.31).  
41  
42  
43  
44

45 In the overall population, 2.9% were current HTP users. The odds of current HTP  
46  
47 use was higher for both cigarette (AOR = 6.14, 95% CI = 2.71, 13.93) and e-cigarette  
48  
49 users (AOR = 84.90, 95% CI = 24.19, 298.22). Having family members who smoked  
50  
51 (AOR = 3.25, 95% CI = 1.51, 7.02) and friends who used HTPs (AOR = 44.72, 95% CI =  
52  
53 20.08, 99.58) were associated with higher odds current use of HTPs.  
54  
55  
56  
57  
58  
59  
60

## Discussion

We investigated HTP use among adolescents in private schools in Guatemala City, where HTPs are becoming readily available.[37] About half of the students were aware of HTPs (54.2%) and susceptible to future use of HTPs (54.2%), although ever (but not current) HTP use (8.4%) and current HTP use (2.9%) were low compared to smoking (21.0% and 8.7%, respectively) and e-cigarette use (28.3% and 27.7%, respectively). Furthermore, almost none of the students who had ever used any tobacco product reported using HTPs as their first tobacco product (1.5%), and nearly all current HTP users also either smoked cigarettes (52.4%) or used e-cigarettes (92.9%). These results suggest that in this population HTPs are not a gateway tobacco product, as has been reported for e-cigarettes in many locations, including in Latin America, even though there is evidence against this claim.[38–40] However, the high prevalence of susceptibility to future use that we found suggests that this may change if HTPs become more popular or accessible.

Currently, the available data on HTP awareness and use is from HICs, which have stronger tobacco control policies, making cross-country comparisons challenging. One study of 16- to 19-year-old adolescents in Canada, the United States, and England[19], found lower levels of awareness (7.0%) and susceptibility (45.0%) compared to our sample (52.4% and 52.4%, respectively). However, this study only included never-smokers and never-vapers. As we found that HTP susceptibility was associated with smoking and e-cigarette use, it is unsurprising that rates are higher in our study population, which included participants who reported tobacco use. Additionally, use of



1  
2  
3 alcohol or marijuana, family and friend use of tobacco products, and higher sensation-  
4 seeking were all positively associated with susceptibility to continued and future use of  
5 HTPs in adolescents; these variables have not been previously studied among HTP users,  
6 but the associations we found are not unexpected given prior research on e-cigarettes  
7 susceptibility and use.[23–26] In the end, our results support Jessor’s Problem Behavior  
8 Theory, which hypothesizes that substance use and other risk behaviors tend to cluster  
9 together.[27]

10  
11 To our knowledge, the only other study of adolescents’ current use of HTPs  
12 comes from South Korea.[20] This 2019 study among 12-18 year old Korean adolescents  
13 found lower ever-use HTP rates than in our sample (2.8% vs. 8.4%), despite the fact that  
14 HTPs have been on the market for longer in Korea than Guatemala. [20] While South  
15 Korea has a much higher GDP per capita than Guatemala, our study population was  
16 selected from private schools in middle and high SES neighborhoods in Guatemala City,  
17 which are predominantly attended by students of significant higher socioeconomic status,  
18 and this could be the cause of the discrepancy. For example, the average monthly cost to  
19 attend one of the schools in our study is \$388-420USD plus an annual enrollment fee of  
20 on average \$550USD, and a 2020 report from the World Bank[41] found that about 50%  
21 of Guatemalans live below the upper-middle income poverty line of about \$165USD per  
22 month. However, according to the 2018 census, 37% of middle school students and 70%  
23 of high school students in Guatemala City attend private schools. Therefore, our results  
24 may be generalizable to Guatemala City, but not the entire country.[42] Our study goes  
25 beyond the study from Korea by assessing correlates of use, which appear similar to  
26 those for e-cigarette use among adolescents.[23–25] For example, correlates of HTP use  
27  
28  
29  
30  
31  
32  
33  
34  
35  
36  
37  
38  
39  
40  
41  
42  
43  
44  
45  
46  
47  
48  
49  
50  
51  
52  
53  
54  
55  
56  
57  
58  
59  
60

1  
2  
3 in our study are also predictors of e-cigarette use in Mexico (use of cigarettes, alcohol,  
4 and marijuana, family use of cigarettes, and sensation-seeking behavior).[23] We also  
5  
6 found that e-cigarette use was a correlate of HTP use.  
7  
8  
9

10 To the best of our knowledge, our study is the first to assess HTP awareness or  
11 use amongst adolescents from LMICs. Furthermore, we did so in a country with weak  
12 FCTC implementation where HTPs, e-cigarettes, and cigarettes are all readily available.  
13  
14 In addition, we used a previously implemented survey that includes novel predictors (e.g.  
15 technophilia, sensation-seeking) of non-conventional tobacco product use. However, our  
16 results must be interpreted in the context of the study's limitations. All data were self-  
17 reported, although the directionality of any biases is not clear. This resulted in an  
18 expected amount of uncertainty due to misreporting. The sample was recruited from  
19 private schools, which predominantly serve middle and high-income students. Therefore,  
20 generalizability to the entire country is limited. Additionally, only four students  
21 exclusively used HTPs (i.e., did not also smoke or use e-cigarettes), and thus is it hard to  
22 draw conclusions about this group. Because of this, model estimates include some large  
23 odds ratios (with similarly large confidence intervals) when examining associations  
24 between HTP use and other tobacco product use. These estimates could be made more  
25 precise with larger sample sizes, but they may also reflect the fact that HTP use typically  
26 follows use of other tobacco products and substances – in other words, at this time HTPs  
27 do not appear to be a “gateway” product for Guatemalan youth. Finally, the data are  
28 cross-sectional and so preclude causal inference for some time-varying variables in the  
29 analyses.  
30  
31  
32  
33  
34  
35  
36  
37  
38  
39  
40  
41  
42  
43  
44  
45  
46  
47  
48  
49  
50  
51  
52  
53  
54  
55  
56  
57  
58  
59  
60

1  
2  
3 Despite its limitations, this study is the first of its kind to examine HTP use and its  
4 correlates among adolescents in an LMIC. While current HTP use was low in our study,  
5 awareness and susceptibility were high and therefore use of IQOS and other HTP  
6 products might increase as they become more widely available. Particularly concerning  
7 is the introduction of flavored HTPs in some countries, which contain sticks with flavor  
8 capsules in the filter that the consumer can crush to make the aerosol taste like diverse  
9 flavors, ranging from mint to ginger to bubble gum.[43] Flavor capsules in cigarettes,  
10 which include an even broader range of flavors (e.g., mango, mint, berry) that are popular  
11 with youth, are increasingly popular worldwide, including in Guatemala, where they  
12 represented 32% of the cigarette market in 2017.[44] While it does not seem like HTPs  
13 are gateway tobacco products for adolescents, as most current users in our sample report  
14 initially using e-cigarettes,, as HTPs become more common and integrate new flavors and  
15 flavor technologies, it is possible that this could change, particularly among adolescents.  
16 It is critical to identify adolescents at risk for tobacco product uptake (cigarette, e-  
17 cigarette, HTPs, etc) so that FCTC policies can be adequately designed and implemented  
18 to in a manner prioritized for this high-risk group. Future studies should investigate  
19 whether rates of HTP use and predictors for HTP use are similar among other populations  
20 in Guatemala, including adults and other socio-economic groups as well as explore how  
21 adolescent e-cigarette users transition to HTP use.  
22  
23  
24  
25  
26  
27  
28  
29  
30  
31  
32  
33  
34  
35  
36  
37  
38  
39  
40  
41  
42  
43  
44  
45  
46  
47  
48  
49  
50  
51  
52  
53  
54  
55  
56  
57  
58  
59  
60

1  
2  
3 **Funding:** This work was supported by Fogarty International Center of the National  
4  
5 Institutes of Health under award number R01 TW010652. The content is solely the  
6  
7 responsibility of the authors and does not necessarily represent the official views of the  
8  
9 National Institutes of Health.  
10

11  
12 **Competing Interests:** None declared.  
13

14 **Author Contributions:** AG – analysis design and execution, drafted manuscript; SM –  
15  
16 study design, questionnaire design, data collection, manuscript review and approval; JM  
17  
18 – study design, questionnaire design, data collection, manuscript review and approval; JT  
19  
20 – study design, questionnaire design, analysis design, manuscript review and approval;  
21  
22  
23 JB – study design, questionnaire design, data collection, manuscript review and approval,  
24  
25 stakeholder engagement  
26  
27

28 **Data Availability Statement:** The datasets used and/or analyzed during the current study  
29  
30 are available from the corresponding author on reasonable request.  
31  
32  
33  
34  
35  
36  
37  
38  
39  
40  
41  
42  
43  
44  
45  
46  
47  
48  
49  
50  
51  
52  
53  
54  
55  
56  
57  
58  
59  
60

## References

- 1 Demissie Z, Jones SE, Clayton HB, *et al.* Adolescent risk behaviors and use of electronic vapor products and cigarettes. *Pediatrics* 2017;**139**. doi:10.1542/peds.2016-2921
- 2 Carroll Chapman SL, Wu LT. E-cigarette prevalence and correlates of use among adolescents versus adults: A review and comparison. *J Psychiatr Res* 2014;**54**:43–54. doi:10.1016/j.jpsychires.2014.03.005
- 3 Frieden TR, Jaffe HW, Richards CL, *et al.* E-Cigarette Use Among Youth and Young Adults. A Report of the Surgeon General. GA:U.S.: 2016.
- 4 WHO. Heated tobacco products (HTPs) information sheet. *Who* 2018;:2–3.
- 5 Auer R, Concha-Lozano N, Jacot-Sadowski I, *et al.* Heat-not-burn tobacco cigarettes: Smoke by any other name. *JAMA Intern Med* 2017;**177**:1050–2. doi:10.1001/jamainternmed.2017.1419
- 6 Nabavizadeh P, Liu J, Havel CM, *et al.* Vascular endothelial function is impaired by aerosol from a single IQOS HeatStick to the same extent as by cigarette smoke. *Tob Control* 2018;**27**:s13–9. doi:10.1136/tobaccocontrol-2018-054325
- 7 Drovandi A, Salem S, Barker D, *et al.* Human Biomarker Exposure From Cigarettes Versus Novel Heat-Not-Burn Devices: A Systematic Review and Meta-Analysis. *Nicotine Tob Res* 2020;**22**:1077–85. doi:10.1093/ntr/ntz200
- 8 Leigh NJ, Tran PL, O'Connor RJ, *et al.* Cytotoxic effects of heated tobacco products (HTP) on human bronchial epithelial cells. *Tob Control* 2018;**27**:s26–9. doi:10.1136/tobaccocontrol-2018-054317
- 9 Stepanov I, Woodward A. Heated tobacco products: Things we do and do not know. *Tob Control* 2018;**27**:s7–8. doi:10.1136/tobaccocontrol-2018-054774
- 10 U.S. Food and Drug Administration. Modified Risk Grant Orders – Exposure Modification: MR0000059-MR0000061, MR0000133. 2020.
- 11 U.S. Food and Drug Administration. FDA Authorizes Marketing of IQOS Tobacco Heating System with ‘Reduced Exposure’ Information. 2020;:10–3. <https://www.fda.gov/news-events/press-announcements/fda-authorizes-marketing-iqos-tobacco-heating-system-reduced-exposure-information>
- 12 Popova L, Lempert LK, Glantz SA. Light and mild redux: Heated tobacco products’ reduced exposure claims are likely to be misunderstood as reduced risk claims. *Tob Control* 2018;**27**:s87–95. doi:10.1136/tobaccocontrol-2018-054324
- 13 Cruz-jiménez L, Barrientos-gutiérrez I, Coutiño-escamilla L. Adult Smokers’ Awareness and Interest in Trying Heated Tobacco Products : Perspectives from Mexico , where HTPs and E-Cigarettes Are Banned. Published Online First: 2020. doi:10.3390/ijerph17072173
- 14 Caputi TL, Leas E, Dredze M, *et al.* They’re heating up: Internet search query trends reveal significant public interest in heat-not-burn tobacco products. *PLoS One* 2017;**12**:1–7. doi:10.1371/journal.pone.0185735
- 15 Liu X, Lugo A, Spizzichino L, *et al.* Heat-not-burn tobacco products are getting hot in Italy. *J Epidemiol* 2018;**28**:274–5. doi:10.2188/jea.JE20180040
- 16 Philip Morris International. Tobacco Meets Technology.
- 17 Glantz SA. Heated tobacco products: The example of IQOS. *Tob Control* 2018;**27**:s3–6. doi:10.1136/tobaccocontrol-2018-054601
- 18 Kim J, Yu H, Lee S, *et al.* Awareness, experience and prevalence of heated tobacco product, IQOS, among young Korean adults. *Tob Control* 2018;**27**:s74–7. doi:10.1136/tobaccocontrol-2018-054390
- 19 Czoli CD, White CM, Reid JL, *et al.* Awareness and interest in IQOS heated tobacco products among youth in Canada, England and the USA. *Tob Control* 2019;:1–7. doi:10.1136/tobaccocontrol-2018-054654
- 20 Kang H, Cho S Il. Heated tobacco product use among Korean adolescents. *Tob Control* 2019;:1–3. doi:10.1136/tobaccocontrol-2019-054949
- 21 Nyman AL, Weaver SR, Popova L, *et al.* Awareness and use of heated tobacco products among US adults, 2016–2017. *Tob Control* 2018;**27**:s55–61. doi:10.1136/tobaccocontrol-2018-054323
- 22 Brose LS, Simonavicius E, Cheeseman H. Awareness and Use of ‘Heat-not-burn’ Tobacco Products in Great Britain. *Tob Regul Sci* 2018;**4**:44–50. doi:10.18001/trs.4.2.4
- 23 Thrasher JF, Abad-Vivero EN, Barrientos-Gutierrez I, *et al.* Prevalence and Correlates of E-

- 1  
2  
3 Cigarette Perceptions and Trial among Early Adolescents in Mexico. *J Adolesc Heal* 2016;**58**:358–  
4 65. doi:10.1016/j.jadohealth.2015.11.008
- 5 24 Morello P, Perez A, Peña L, *et al*. Prevalence and predictors of e-cigarette trial among adolescents  
6 in Argentina. *Tob Prev Cessat* 2016;**2**:1–8. doi:10.18332/tpc/66950
- 7 25 Zavala-Arciniega L, Reynales-Shigematsu LM, Lozano P, *et al*. Patterns of awareness and use of  
8 electronic cigarettes in Mexico, a middle-income country that bans them: Results from a 2016  
9 national survey. *Prev Med (Baltim)* 2018;**116**:211–8. doi:10.1016/j.ypmed.2018.09.018
- 10 26 Vardavas CI, Filippidis FT, Agaku IT. Determinants and prevalence of e-cigarette use throughout  
11 the European union: A secondary analysis of 26 566 youth and adults from 27 countries. *Tob*  
12 *Control* 2015;**24**:442–8. doi:10.1136/tobaccocontrol-2013-051394
- 13 27 Crowther B, Jessor R, Jessor SL. Problem Behavior and Psychosocial Development: A  
14 Longitudinal Study of Youth. *Contemp Sociol* Published Online First: 1978. doi:10.2307/2065689
- 15 28 Barnoya J, Monzon JC, Briz P, *et al*. Compliance to the smoke-free law in Guatemala 5-years after  
16 implementation. *BMC Public Health* 2016;:1–5. doi:10.1186/s12889-016-2960-x
- 17 29 WHO. Guatemala Metropolitan Area-STEPS 2015 Fact sheet. 2015;:4–6. doi:10.7  
18 Youth G, Survey T, Sheet F, *et al*. Guatemala 2015. 2015;:3–4.
- 19 31 Cruz-Jiménez L, Barrientos-Gutiérrez I, Coutiño-Escamilla L, *et al*. Adult Smokers' Awareness  
20 and Interest in Trying Heated Tobacco Products: Perspectives from Mexico, where HTPs and E-  
21 Cigarettes Are Banned. *Int J Environ Res Public Health* 2020;**17**. doi:10.3390/ijerph17072173
- 22 32 Pierce JP, Choi WS, Gilpin EA, *et al*. Validation of useceptibility as a predictor of which  
23 adolescents take up smoking in the United States. *Heal Psychol* 1996;**15**:355–61.  
24 doi:10.1037/0278-6133.15.5.355
- 25 33 Morello P, Pérez A, Braun SN, *et al*. Smoking susceptibility as a predictive measure of cigarette  
26 and e-cigarette use among early adolescents. *Salud Publica Mex* 2018;**60**:423–31.  
27 doi:10.21149/9193
- 28 34 Boyce W, Torsheim T, Currie C, *et al*. The family affluence scale as a measure of national wealth:  
29 Validation of an adolescent self-report measure. *Soc Indic Res* 2006;**78**:473–87.  
30 doi:10.1007/s11205-005-1607-6
- 31 35 Barrientos-Gutierrez I, Lozano P, Arillo-Santillan E, *et al*. “Technophilia”: A new risk factor for  
32 electronic cigarette use among early adolescents? *Addict Behav* 2019;**91**:193–200.  
33 doi:10.1016/j.addbeh.2018.09.004
- 34 36 Zavala-Arciniega L, Lozano P, Kollath-Cattano C, *et al*. E-cigarette use frequency and motivations  
35 among current users in middle school. *Drug Alcohol Depend* 2019;**204**:107585.  
36 doi:10.1016/j.drugalcdep.2019.107585
- 37 37 Barnoya J, Monzon D, Pinetta J, *et al*. FLAVOR CAPSULE CIGARETTES, ELECTRONIC  
38 CIGARETTES, AND HEAT NOT BURN PRODUCTS POINT OF SALE ADVERTISING IN  
39 GUATEMALA. In: *The Society for Research on Nicotine and Tobacco*. 2020. New Orleans, USA.
- 40 38 Soneji S, Barrington-Trimis JL, Wills TA, *et al*. Association between initial use of e-cigarettes and  
41 subsequent cigarette smoking among adolescents and young adults a systematic review and meta-  
42 analysis. *JAMA Pediatr* 2017;**171**:788–97. doi:10.1001/jamapediatrics.2017.1488
- 43 39 Lozano P, Barrientos-Gutierrez I, Arillo-Santillan E, *et al*. A longitudinal study of electronic  
44 cigarette use and onset of conventional cigarette smoking and marijuana use among Mexican  
45 adolescents. *Drug Alcohol Depend* 2017;**180**:427–30. doi:10.1016/j.drugalcdep.2017.09.001
- 46 40 Levy DT, Warner KE, Michael Cummings K, *et al*. Examining the relationship of vaping to  
47 smoking initiation among US youth and young adults: A reality check. *Tob Control* 2019;**28**:629–  
48 35. doi:10.1136/tobaccocontrol-2018-054446
- 49 41 The World Bank. Poverty & Equity Brief: Latin America & the Caribbean, Guatemala. 2020.
- 50 42 Instituto Nacionaol de Estadística Guatemala INE. XII Censo Nacional de Población y VII de  
51 Vivienda. Guatemala: 2019.
- 52 43 Cho YJ, Thrasher JF. Flavour capsule heat-sticks for heated tobacco products. *Tob Control*  
53 2019;**28**:E158–9. doi:10.1136/tobaccocontrol-2018-054472
- 54 44 Moodie C, Thrasher JF, Cho YJ, *et al*. Flavour capsule cigarettes continue to experience strong  
55 global growth. *Tob Control* 2018;:1–2. doi:10.1136/tobaccocontrol-2018-054711

Table 1. Characteristics of secondary school student participants in Guatemala, 2019 (N = 2870)

|                                            | N      | %     |
|--------------------------------------------|--------|-------|
| <b>Dependent variables</b>                 |        |       |
| Aware of HTP                               | 1503   | 52.4  |
| Susceptible to HTP                         | 1500   | 52.4  |
| HTP use                                    |        |       |
| Never (unsusceptible) <sup>A</sup>         | 1993   | 69.6  |
| Never (susceptible) <sup>B</sup>           | 547    | 19.1  |
| Ever (not current)                         | 241    | 8.4   |
| Current                                    | 84     | 2.9   |
| <b>Socio-demographic characteristics</b>   |        |       |
| Sex                                        |        |       |
| Male                                       | 1438   | 50.3  |
| Female                                     | 1420   | 49.7  |
| Age (Mean, SD)*                            | 15.09* | 1.32* |
| Grade - USA categories                     |        |       |
| Basico (grades 8-9)                        | 1238   | 43.1  |
| Bachillerato (grades 10-12)                | 1632   | 56.9  |
| School performance                         |        |       |
| < 80%                                      | 523    | 18.8  |
| 80-89%                                     | 1321   | 47.6  |
| 90-100%                                    | 932    | 33.6  |
| Parents' highest educational attainment    |        |       |
| Secondary school or less                   | 49     | 1.7   |
| High school or technical school            | 537    | 18.7  |
| University or more                         | 2146   | 74.8  |
| Missing                                    | 138    | 4.8   |
| <b>Substance use variables</b>             |        |       |
| Ever use of any tobacco product            | 1675   | 58.4  |
| Of ever users, first tobacco product used: |        |       |
| Cigarette                                  | 456    | 43.2  |
| E-cigarette                                | 570    | 54.0  |
| HTP                                        | 16     | 1.5   |
| Other                                      | 13     | 1.2   |
| Cigarette smoker                           |        |       |
| Never (unsusceptible)*                     | 1261   | 44.0  |
| Never (susceptible)*                       | 754    | 26.3  |
| Ever (not current)                         | 601    | 21.0  |
| Current                                    | 250    | 8.7   |
| E-cigarette user                           |        |       |
| Never (unsusceptible)*                     | 713    | 25.0  |
| Never (susceptible)*                       | 545    | 19.1  |
| Ever (not current)                         | 808    | 28.3  |
| Current                                    | 791    | 27.7  |
| Of current smokers, which product used:    |        |       |
| Only cigarettes                            | 48     | 5.7   |
| Only e-cigarettes                          | 556    | 65.9  |
| Only HTPs                                  | 4      | 0.5   |
| More than one product                      | 236    | 30.0  |
| Of current HTP users:                      |        |       |
| Also smokes cigarettes                     | 44     | 52.4  |
| Also smokes e-cigarettes                   | 78     | 92.9  |
| Alcohol user                               |        |       |
| Never                                      | 683    | 23.9  |
| Ever (not current)                         | 935    | 32.7  |
| Current (no binge)                         | 676    | 23.7  |
| Current (binge) <sup>C</sup>               | 561    | 19.6  |
| Marijuana user                             |        |       |
| Never                                      | 2563   | 90.2  |
| Ever (not current)                         | 177    | 6.2   |
| Current                                    | 103    | 3.6   |
| Internet cigarette ad exposure             |        |       |
| Never                                      | 980    | 34.5  |
| Rarely/sometimes                           | 1543   | 54.3  |
| Mostly/always                              | 319    | 11.2  |
| Internet e-cigarette ad exposure           |        |       |
| Never                                      | 881    | 31.0  |
| Rarely/sometimes                           | 1471   | 51.8  |
| Mostly/always                              | 490    | 17.2  |
| Family member smokes cigarettes            | 1025   | 35.8  |

|   |                                         |      |      |
|---|-----------------------------------------|------|------|
| 3 | Family member uses e-cigarettes         | 599  | 21.0 |
| 4 | Family member uses HTP                  | 395  | 13.8 |
| 5 | Friend smokes cigarettes                | 1551 | 54.1 |
| 6 | Friend smokes e-cigarettes              | 1817 | 63.6 |
| 6 | Friend uses HTP                         | 423  | 14.8 |
| 7 | <b>Constructed scales (score range)</b> | Mean | SD   |
| 8 | Sensation seeking (1-4)                 | 2.77 | 0.7  |
| 9 | Technophilia (0-7)                      | 5.73 | 0.9  |
| 9 | Family affluent scale (0-9)             | 7.27 | 1.57 |

<sup>A</sup> Unsusceptible is defined as answering definitely no to both "Do you think you will smoke in the next 12 months?" and "If one of your best friends offered you a cigarette, would you smoke it?"

<sup>B</sup> Susceptible is defined as answering probably no, probably yes, or definitely yes to either "Do you think you will smoke in the next 12 months?" or "If one of your best friends offered you a cigarette, would you smoke it?"

<sup>C</sup> Binge drinking is defined as consuming 4 or more drinks on one occasion in the last month

For peer review only



Table 2. Crude and adjusted odds ratios for awareness and susceptibility of HTP among Guatemalan youth<sup>A</sup>

|                                                 | HTP awareness<br>N = 1503 (52.4%) |           |              |                  |              | HTP susceptible<br>N = 1500 (52.4%) |           |                 |                  |                |
|-------------------------------------------------|-----------------------------------|-----------|--------------|------------------|--------------|-------------------------------------|-----------|-----------------|------------------|----------------|
|                                                 | %                                 | OR        | CI 95%       | AOR <sup>B</sup> | CI 95%       | %                                   | OR        | CI 95%          | AOR <sup>B</sup> | CI 95%         |
| <b><i>Socio-demographic characteristics</i></b> |                                   |           |              |                  |              |                                     |           |                 |                  |                |
| <b>Sex</b>                                      |                                   |           |              |                  |              |                                     |           |                 |                  |                |
| Female                                          | 54.94                             | Reference |              | Reference        |              | 52.33                               | Reference |                 | Reference        |                |
| Male                                            | 49.72                             | 0.86      | (0.74, 1.01) | 0.81*            | (0.68, 0.97) | 52.40                               | 0.98      | (0.84, 1.14)    | 0.83             | (0.66, 1.04)   |
| Age (Mean) <sup>A</sup>                         | 15.29 <sup>A</sup>                | 1.25*     | (1.17, 1.32) | 1.05             | (0.93, 1.18) | 15.26 <sup>A</sup>                  | 1.29*     | (1.22, 1.37)    | 0.93             | (0.79, 1.08)   |
| <b>Grade - USA categories</b>                   |                                   |           |              |                  |              |                                     |           |                 |                  |                |
| Basico (grades 8-9)                             | 43.77                             | Reference |              | Reference        |              | 44.04                               | Reference |                 | Reference        |                |
| Bachillerato (grades 10-12)                     | 58.95                             | 1.73*     | (1.48, 2.02) | 1.00             | (0.74, 1.35) | 58.64                               | 1.92*     | (1.64, 2.24)    | 1.08             | (0.73, 1.59)   |
| <b>School performance</b>                       |                                   |           |              |                  |              |                                     |           |                 |                  |                |
| < 80%                                           | 53.26                             | Reference |              | Reference        |              | 60.92                               | Reference |                 | Reference        |                |
| 80-89%                                          | 54.62                             | 1.02      | (0.82, 1.27) | 1.30*            | (1.01, 1.67) | 55.12                               | 0.75*     | (0.61, 0.93)    | 0.88             | (0.64, 1.20)   |
| 90-100%                                         | 48.61                             | 0.72*     | (0.57, 0.92) | 1.13             | (0.85, 1.51) | 44.58                               | 0.49*     | (0.39, 0.62)    | 0.83             | (0.58, 1.19)   |
| <b>Parents' highest educational attainment</b>  |                                   |           |              |                  |              |                                     |           |                 |                  |                |
| Secondary school or less                        | 53.06                             | Reference |              | Reference        |              | 46.94                               | Reference |                 | Reference        |                |
| High school or technical school                 | 52.33                             | 1.00      | (0.55, 1.83) | 0.75             | (0.37, 1.51) | 52.33                               | 1.23      | (0.69, 2.22)    | 1.07             | (0.43, 2.67)   |
| University or more                              | 52.87                             | 1.06      | (0.60, 1.90) | 0.80             | (0.41, 1.59) | 53.29                               | 1.27      | (0.72, 2.24)    | 1.34             | (0.55, 3.27)   |
| Missing                                         | 45.26                             | 0.71      | (0.37, 1.40) | 0.91             | (0.40, 2.05) | 39.71                               | 0.75      | (0.39, 1.46)    | 1.11             | (0.39, 3.16)   |
| <b><i>Substance use variables</i></b>           |                                   |           |              |                  |              |                                     |           |                 |                  |                |
| <b>Cigarette smoker</b>                         |                                   |           |              |                  |              |                                     |           |                 |                  |                |
| Never (unsusceptible)                           | 41.59                             | Reference |              | Reference        |              | 17.00                               | Reference |                 | Reference        |                |
| Never (susceptible)                             | 51.39                             | 1.54*     | (1.28, 1.86) | 0.88             | (0.69, 1.13) | 75.90                               | 15.68*    | (12.52, 19.65)  | 6.18*            | (4.72, 8.07)   |
| Ever (not current)                              | 65.06                             | 2.69*     | (2.19, 3.31) | 1.19             | (0.89, 1.59) | 81.36                               | 22.69*    | (17.53, 29.37)  | 6.93*            | (5.02, 9.57)   |
| Current                                         | 79.60                             | 5.60*     | (4.01, 7.81) | 1.58             | (1.00, 2.49) | 90.80                               | 51.58*    | (32.64, 81.51)  | 10.53*           | (5.92, 18.71)  |
| <b>E-cigarette user</b>                         |                                   |           |              |                  |              |                                     |           |                 |                  |                |
| Never (unsusceptible)                           | 33.43                             | Reference |              | Reference        |              | 4.64                                | Reference |                 | Reference        |                |
| Never (susceptible)                             | 43.12                             | 1.60*     | (1.27, 2.03) | 1.28             | (0.95, 1.73) | 63.42                               | 36.41*    | (24.52, 54.07)  | 12.18*           | (7.79, 19.03)  |
| Ever (not current)                              | 55.94                             | 2.51*     | (2.03, 3.09) | 1.65*            | (1.23, 2.21) | 61.34                               | 38.66*    | (26.34, 57.75)  | 11.08*           | (7.07, 17.37)  |
| Current                                         | 72.41                             | 4.67*     | (3.73, 5.86) | 2.10*            | (1.47, 2.99) | 78.73                               | 124.45*   | (82.40, 187.94) | 21.87*           | (13.02, 36.71) |
| <b>Alcohol</b>                                  |                                   |           |              |                  |              |                                     |           |                 |                  |                |
| Never                                           | 35.34                             | Reference |              | Reference        |              | 20.56                               | Reference |                 | Reference        |                |
| Ever (not current)                              | 46.25                             | 1.65*     | (1.34, 2.03) | 1.25             | (0.97, 1.60) | 52.41                               | 4.18*     | (3.33, 5.26)    | 1.73*            | (1.25, 2.41)   |
| Current (no binge)                              | 57.84                             | 2.44*     | (1.96, 3.05) | 1.28             | (0.95, 1.71) | 65.68                               | 8.78*     | (6.81, 11.32)   | 1.49*            | (1.03, 2.17)   |
| Current (binge)                                 | 76.83                             | 5.27*     | (4.07, 6.82) | 1.84*            | (1.28, 2.65) | 75.36                               | 17.99*    | (13.41, 24.15)  | 1.65*            | (1.04, 2.60)   |
| <b>Marijuana</b>                                |                                   |           |              |                  |              |                                     |           |                 |                  |                |
| Never                                           | 49.43                             | Reference |              | Reference        |              | 48.40                               | Reference |                 | Reference        |                |
| Ever (not current)                              | 77.97                             | 3.49*     | (2.42, 5.04) | 1.50             | (0.97, 2.32) | 85.88                               | 6.79*     | (4.40, 10.46)   | 1.61             | (0.94, 2.75)   |
| Current                                         | 81.55                             | 4.03*     | (2.42, 6.71) | 1.48             | (0.82, 2.67) | 93.20                               | 16.78*    | (7.72, 36.49)   | 3.49*            | (1.40, 8.72)   |
| <b>Internet cigarette ad exposure</b>           |                                   |           |              |                  |              |                                     |           |                 |                  |                |
| Never                                           | 44.74                             | Reference |              | Reference        |              | 38.78                               | Reference |                 | Reference        |                |
| Rarely/sometimes                                | 55.19                             | 1.66*     | (1.40, 1.96) | 1.07             | (0.86, 1.34) | 58.64                               | 2.22*     | (1.88, 2.62)    | 1.40*            | (1.06, 1.84)   |
| Mostly/always                                   | 63.01                             | 2.44*     | (1.87, 3.19) | 1.08             | (0.75, 1.57) | 64.78                               | 2.87*     | (2.20, 3.73)    | 1.52             | (0.97, 2.40)   |
| <b>Internet e-cigarette ad exposure</b>         |                                   |           |              |                  |              |                                     |           |                 |                  |                |
| Never                                           | 39.70                             | Reference |              | Reference        |              | 35.38                               | Reference |                 | Reference        |                |
| Rarely/sometimes                                | 55.47                             | 2.00*     | (1.68, 2.38) | 1.39*            | (1.10, 1.75) | 57.11                               | 2.43*     | (2.05, 2.89)    | 1.05             | (0.78, 1.41)   |
| Mostly/always                                   | 66.12                             | 3.33*     | (2.62, 4.22) | 1.76*            | (1.26, 2.46) | 69.12                               | 4.05*     | (3.19, 5.13)    | 0.86             | (0.57, 1.30)   |
| <b>Family member smokes cigarettes</b>          |                                   |           |              |                  |              |                                     |           |                 |                  |                |
| No                                              | 45.78                             | Reference |              | Reference        |              | 46.13                               | Reference |                 | Reference        |                |
| Yes                                             | 64.36                             | 2.14*     | (1.82, 2.51) | 1.31*            | (1.07, 1.60) | 63.80                               | 2.08*     | (1.78, 2.44)    | 1.17             | (0.91, 1.50)   |
| <b>Family member smokes e-cigarettes</b>        |                                   |           |              |                  |              |                                     |           |                 |                  |                |
| No                                              | 47.96                             | Reference |              | Reference        |              | 48.76                               | Reference |                 | Reference        |                |
| Yes                                             | 69.28                             | 2.17*     | (1.78, 2.64) | 1.25             | (0.98, 1.59) | 66.39                               | 2.25*     | (1.85, 2.73)    | 1.08             | (0.81, 1.45)   |
| <b>Family member uses HTP</b>                   |                                   |           |              |                  |              |                                     |           |                 |                  |                |

|    |                                         |             |           |               |                        |               |             |           |               |                        |               |
|----|-----------------------------------------|-------------|-----------|---------------|------------------------|---------------|-------------|-----------|---------------|------------------------|---------------|
| 1  | No                                      | 49.98       | Reference |               | Reference              |               | 51.18       | Reference |               | Reference              |               |
| 2  | Yes                                     | 67.85       | 2.08*     | (1.65, 2.62)  | 1.60*                  | (1.22, 2.09)  | 60.51       | 1.48*     | (1.19, 1.84)  | 0.98                   | (0.71, 1.36)  |
| 3  | Friend smokes cigarettes                |             |           |               |                        |               |             |           |               |                        |               |
| 4  | No                                      | 43.72       | Reference |               | Reference              |               | 40.50       | Reference |               | Reference              |               |
| 5  | Yes                                     | 59.81       | 1.89*     | (1.62, 2.20)  | 1.03                   | (0.83, 1.29)  | 62.56       | 2.50*     | (2.14, 2.91)  | 0.91                   | (0.70, 1.19)  |
| 6  | Friend uses e-cigarettes                |             |           |               |                        |               |             |           |               |                        |               |
| 7  | No                                      | 39.71       | Reference |               | Reference              |               | 38.98       | Reference |               | Reference              |               |
| 8  | Yes                                     | 59.80       | 1.96*     | (1.67, 2.31)  | 0.72*                  | (0.57, 0.91)  | 60.17       | 2.75*     | (2.33, 3.25)  | 0.70*                  | (0.51, 0.95)  |
| 9  | Friend uses HTP                         |             |           |               |                        |               |             |           |               |                        |               |
| 10 | No                                      | 48.05       | Reference |               | Reference              |               | 49.90       | Reference |               | Reference              |               |
| 11 | Yes                                     | 77.73       | 4.19*     | (3.27, 5.38)  | 4.15*                  | (3.11, 5.55)  | 66.43       | 1.98*     | (1.59, 2.47)  | 1.83*                  | (1.31, 2.57)  |
| 12 | <b>Constructed scales (score range)</b> | <b>Mean</b> | <b>OR</b> | <b>CI 95%</b> | <b>AOR<sup>B</sup></b> | <b>CI 95%</b> | <b>Mean</b> | <b>OR</b> | <b>CI 95%</b> | <b>AOR<sup>B</sup></b> | <b>CI 95%</b> |
| 13 | Sensation seeking (1-4)                 | 2.87        | 1.61*     | (1.44, 1.80)  | 1.08                   | (0.95, 1.24)  | 2.97        | 2.47*     | (2.20, 2.78)  | 1.41*                  | (1.19, 1.68)  |
| 14 | Technophilia (0-7)                      | 5.85        | 1.29*     | (1.19, 1.41)  | 1.07                   | (0.97, 1.19)  | 5.82        | 1.29*     | (1.18, 1.40)  | 1.04                   | (0.91, 1.20)  |
| 15 | Family affluent scale (0-9)             | 7.46        | 1.15*     | (1.09, 1.21)  | 1.10*                  | (1.04, 1.17)  | 7.29        | 1.04      | (0.99, 1.09)  | 0.94                   | (0.88, 1.02)  |

<sup>A</sup> All models include a random intercept for each participant to account for school-clustering

<sup>B</sup> Adjusted models are adjusted for all independent variables

\* Significant at  $\alpha = 0.05$

Table 3. Crude and adjusted odds ratios for ever and current HTP use among Guatemalan youth<sup>A</sup>

|                                          | Ever HTP use (not current)<br>N = 241 (8.6%) |                    |           |                  |           | Current HTP use<br>N = 84 (2.9%) |                    |           |                  |           |                 |
|------------------------------------------|----------------------------------------------|--------------------|-----------|------------------|-----------|----------------------------------|--------------------|-----------|------------------|-----------|-----------------|
|                                          | %                                            | OR                 | CI 95%    | AOR <sup>B</sup> | CI 95%    | %                                | OR                 | CI 95%    | AOR <sup>B</sup> | CI 95%    |                 |
| <b>Socio-demographic characteristics</b> |                                              |                    |           |                  |           |                                  |                    |           |                  |           |                 |
| Sex                                      |                                              |                    |           |                  |           |                                  |                    |           |                  |           |                 |
| 22                                       | Female                                       | 7.56               | Reference |                  | Reference |                                  | 2.63               | Reference |                  | Reference |                 |
| 23                                       | Male                                         | 9.75               | 1.40*     | (1.07, 1.84)     | 1.22      | (0.86, 1.72)                     | 3.42               | 1.31      | (0.84, 2.06)     | 1.03      | (0.56, 1.89)    |
| 24                                       | Age (Mean) <sup>A</sup>                      | 15.87 <sup>A</sup> | 1.72*     | (1.53, 1.94)     | 1.20      | (0.97, 1.50)                     | 15.65 <sup>A</sup> | 1.39      | (1.16, 1.65)     | 0.85      | (0.58, 1.25)    |
| Grade - USA categories                   |                                              |                    |           |                  |           |                                  |                    |           |                  |           |                 |
| 25                                       | Basico (grades 8-9)                          | 3.77               | Reference |                  | Reference |                                  | 1.43               | Reference |                  | Reference |                 |
| 26                                       | Bachillerato (grades 10-12)                  | 12.44              | 3.45*     | (2.47, 4.82)     | 0.92      | (0.49, 1.71)                     | 4.45               | 2.86*     | (1.69, 4.83)     | 2.18      | (0.68, 6.96)    |
| School performance                       |                                              |                    |           |                  |           |                                  |                    |           |                  |           |                 |
| 27                                       | < 80%                                        | 11.78              | Reference |                  | Reference |                                  | 4.54               | Reference |                  | Reference |                 |
| 28                                       | 80-89%                                       | 10.07              | 0.71      | (0.50, 1.01)     | 1.04      | (0.67, 1.63)                     | 3.36               | 0.69      | (0.41, 1.17)     | 0.74      | (0.36, 1.52)    |
| 29                                       | 90-100%                                      | 5.24               | 0.29*     | (0.19, 0.45)     | 0.69      | (0.38, 1.25)                     | 1.81               | 0.38*     | (0.20, 0.72)     | 0.84      | (0.35, 2.00)    |
| Parents' highest educational attainment  |                                              |                    |           |                  |           |                                  |                    |           |                  |           |                 |
| 30                                       | Secondary school or less                     | 16.67              | Reference |                  | Reference |                                  | 2.44               | Reference |                  | Reference |                 |
| 31                                       | High school or technical school              | 10.90              | 0.63      | (0.28, 1.43)     | 0.50      | (0.18, 1.69)                     | 2.92               | 1.37      | (0.18, 10.70)    | 0.62      | (0.07, 5.60)    |
| 32                                       | University or more                           | 8.12               | 0.48      | (0.22, 1.04)     | 0.36      | (0.12, 1.07)                     | 3.29               | 1.52      | (0.21, 11.25)    | 0.63      | (0.07, 5.51)    |
| 33                                       | Missing                                      | 5.15               | 0.27*     | (0.09, 0.80)     | 0.28      | (0.06, 1.37)                     | 0.77               | 0.72      | (0.06, 8.11)     | 0.00      | NA              |
| <b>Substance use variables</b>           |                                              |                    |           |                  |           |                                  |                    |           |                  |           |                 |
| Cigarette smoker <sup>C</sup>            |                                              |                    |           |                  |           |                                  |                    |           |                  |           |                 |
| 35                                       | Never (unsusceptible)                        | 1.75               | Reference |                  | Reference |                                  |                    |           |                  |           |                 |
| 36                                       | Never (susceptible)                          | 4.59               | 2.76*     | (1.60, 4.76)     | 1.34      | (0.69, 2.61)                     |                    |           |                  |           |                 |
| 37                                       | Ever (not current)                           | 18.37              | 12.70*    | (7.92, 20.36)    | 3.73*     | (2.03, 6.82)                     | 1.59               | Reference |                  | Reference |                 |
| 38                                       | Current                                      | 37.98              | 34.93*    | (21.01, 58.08)   | 6.63*     | (3.20, 13.74)                    | 24.56              | 13.81*    | (8.79, 21.68)    | 3.90*     | (1.90, 8.02)    |
| E-cigarette user <sup>C</sup>            |                                              |                    |           |                  |           |                                  |                    |           |                  |           |                 |
| 39                                       | Never (unsusceptible)                        | 0.42               | Reference |                  | Reference |                                  |                    |           |                  |           |                 |
| 40                                       | Never (susceptible)                          | 0.55               | 1.31      | (0.26, 6.49)     | 0.71      | (0.13, 3.92)                     |                    |           |                  |           |                 |
| 41                                       | Ever (not current)                           | 11.19              | 29.66*    | (9.37, 93.89)    | 9.31*     | (2.61, 33.23)                    | 0.25               | Reference |                  | Reference |                 |
| 42                                       | Current                                      | 20.00              | 59.31*    | (18.84, 186.69)  | 10.40*    | (2.75, 39.17)                    | 11.73              | 45.24*    | (19.32, 105.94)  | 46.12*    | (16.15, 131.74) |
| Alcohol <sup>D</sup>                     |                                              |                    |           |                  |           |                                  |                    |           |                  |           |                 |
| 43                                       | Never                                        | 1.47               | Reference |                  | Reference |                                  |                    |           |                  |           |                 |

|    |                                         |             |           |                |                        |               |             |           |               |                        |                |
|----|-----------------------------------------|-------------|-----------|----------------|------------------------|---------------|-------------|-----------|---------------|------------------------|----------------|
| 1  | Ever (not current)                      | 4.22        | 2.96*     | (1.47, 5.97)   | 1.14                   | (0.50, 2.60)  |             |           |               |                        |                |
| 2  | Current (no binge)                      | 8.18        | 5.99*     | (3.02, 11.87)  | 1.19                   | (0.52, 2.75)  | 1.73        | Reference |               | Reference              |                |
| 3  | Current (binge)                         | 26.25       | 23.92*    | (12.43, 46.03) | 2.53*                  | (1.08, 5.95)  | 10.12       | 4.55*     | (2.94, 7.06)  | 0.53                   | (0.27, 1.06)   |
| 4  | Marijuana                               |             |           |                |                        |               |             |           |               |                        |                |
| 5  | Never                                   | 6.07        | Reference |                | Reference              |               | 1.74        | Reference |               | Reference              |                |
| 6  | Ever (not current)                      | 29.03       | 6.18*     | (4.20, 9.09)   | 1.37                   | (0.84, 2.22)  | 16.67       | 8.54*     | (5.03, 14.51) | 1.91                   | (0.87, 4.18)   |
| 7  | Current                                 | 45.98       | 12.57*    | (7.93, 19.93)  | 2.29*                  | (1.27, 4.13)  | 25.40       | 10.64*    | (5.77, 19.60) | 1.32                   | (0.50, 3.45)   |
| 8  | Internet cigarette ad exposure          |             |           |                |                        |               |             |           |               |                        |                |
| 9  | Never                                   | 6.54        | Reference |                | Reference              |               | 1.85        | Reference |               | Reference              |                |
| 10 | Rarely/sometimes                        | 8.88        | 1.46*     | (1.07, 2.00)   | 1.13                   | (0.74, 1.75)  | 3.12        | 1.60      | (0.92, 2.78)  | 1.27                   | (0.55, 2.90)   |
| 11 | Mostly/always                           | 14.33       | 2.56*     | (1.69, 3.88)   | 1.50                   | (0.81, 2.77)  | 6.88        | 3.37*     | (1.75, 6.51)  | 2.65                   | (0.91, 7.71)   |
| 12 | Internet e-cigarette ad exposure        |             |           |                |                        |               |             |           |               |                        |                |
| 13 | Never                                   | 5.45        | Reference |                | Reference              |               | 2.04        | Reference |               | Reference              |                |
| 14 | Rarely/sometimes                        | 8.09        | 1.54*     | (1.08, 2.18)   | 0.67                   | (0.41, 1.09)  | 2.73        | 1.37      | (0.77, 2.45)  | 0.49                   | (0.20, 1.18)   |
| 15 | Mostly/always                           | 16.41       | 3.61*     | (2.45, 5.31)   | 0.98                   | (0.54, 1.77)  | 6.52        | 2.95*     | (1.59, 5.47)  | 0.40                   | (0.14, 1.13)   |
| 16 | Family member smokes cigarettes         |             |           |                |                        |               |             |           |               |                        |                |
| 17 | No                                      | 5.28        | Reference |                | Reference              |               | 2.07        | Reference |               | Reference              |                |
| 18 | Yes                                     | 14.88       | 3.10*     | (2.36, 4.07)   | 1.70*                  | (1.19, 2.45)  | 5.01        | 2.28*     | (1.47, 3.54)  | 2.00*                  | (1.03, 3.88)   |
| 19 | Family member smokes e-cigarettes       |             |           |                |                        |               |             |           |               |                        |                |
| 20 | No                                      | 6.58        | Reference |                | Reference              |               | 2.42        | Reference |               | Reference              |                |
| 21 | Yes                                     | 16.49       | 2.64*     | (1.98, 3.51)   | 1.37                   | (0.94, 2.01)  | 5.74        | 2.19*     | (1.39, 3.46)  | 0.74                   | (0.38, 1.46)   |
| 22 | Family member uses HTP                  |             |           |                |                        |               |             |           |               |                        |                |
| 23 | No                                      | 8.09        | Reference |                | Reference              |               | 2.86        | Reference |               | Reference              |                |
| 24 | Yes                                     | 12.40       | 1.58*     | (1.13, 2.23)   | 0.90                   | (0.58, 1.42)  | 4.60        | 1.49      | (0.86, 2.60)  | 1.08                   | (0.50, 2.33)   |
| 25 | Friend smokes cigarettes                |             |           |                |                        |               |             |           |               |                        |                |
| 26 | No                                      | 4.77        | Reference |                | Reference              |               | 1.12        | Reference |               | Reference              |                |
| 27 | Yes                                     | 12.07       | 2.71*     | (2.01, 3.66)   | 0.77                   | (0.50, 1.18)  | 4.89        | 4.03*     | (2.29, 7.07)  | 0.83                   | (0.38, 1.82)   |
| 28 | Friend uses e-cigarettes                |             |           |                |                        |               |             |           |               |                        |                |
| 29 | No                                      | 3.97        | Reference |                | Reference              |               | 0.60        | Reference |               | Reference              |                |
| 30 | Yes                                     | 10.22       | 2.93*     | (2.06, 4.18)   | 0.51*                  | (0.30, 0.86)  | 4.63        | 6.52*     | (3.00, 14.19) | 0.61                   | (0.21, 1.77)   |
| 31 | Friend uses HTP                         |             |           |                |                        |               |             |           |               |                        |                |
| 32 | No                                      | 6.72        | Reference |                | Reference              |               | 1.19        | Reference |               | Reference              |                |
| 33 | Yes                                     | 21.14       | 3.98*     | (2.94, 5.39)   | 7.28*                  | (4.64, 11.43) | 15.65       | 12.40*    | (7.81, 19.71) | 21.06*                 | (11.13, 39.85) |
| 34 | <b>Constructed scales (score range)</b> | <b>Mean</b> | <b>OR</b> | <b>CI 95%</b>  | <b>AOR<sup>B</sup></b> | <b>CI 95%</b> | <b>Mean</b> | <b>OR</b> | <b>CI 95%</b> | <b>AOR<sup>B</sup></b> | <b>CI 95%</b>  |
| 35 | Sensation seeking (1-4)                 | 3.10        | 2.46*     | (1.97, 3.07)   | 1.27                   | (0.96, 1.68)  | 3.25        | 3.34*     | (2.26, 4.92)  | 1.34                   | (0.80, 2.27)   |
| 36 | Technophilia (0-7)                      | 5.96        | 1.40*     | (1.18, 1.67)   | 1.12                   | (0.89, 1.40)  | 6.11        | 1.81*     | (1.32, 2.48)  | 1.34                   | (0.90, 2.00)   |
| 37 | Family affluent scale (0-9)             | 7.64        | 1.18*     | (1.07, 1.30)   | 1.15*                  | (1.02, 1.31)  | 7.63        | 1.18*     | (1.01, 1.38)  | 1.04                   | (0.84, 1.29)   |

<sup>A</sup> All models include a random intercept for each participant to account for school-clustering  
<sup>B</sup> Adjusted models are adjusted for all independent variables  
<sup>C</sup> Due to low counts, for current use models, cigarette and e-cigarette use was combined to current user versus non-current user  
<sup>D</sup> Due to low counts, alcohol use was combined to non-binge versus binge in last month  
 \* Significant at  $\alpha = 0.05$

STROBE Statement—Checklist of items that should be included in reports of *cross-sectional studies*

|                           | Item No | Recommendation                                                                                                                                                                                               | Page No |
|---------------------------|---------|--------------------------------------------------------------------------------------------------------------------------------------------------------------------------------------------------------------|---------|
| <b>Title and abstract</b> | 1       | (a) Indicate the study's design with a commonly used term in the title or the abstract                                                                                                                       | 1       |
|                           |         | (b) Provide in the abstract an informative and balanced summary of what was done and what was found                                                                                                          | 2       |
| <b>Introduction</b>       |         |                                                                                                                                                                                                              |         |
| Background/rationale      | 2       | Explain the scientific background and rationale for the investigation being reported                                                                                                                         | 4       |
| Objectives                | 3       | State specific objectives, including any prespecified hypotheses                                                                                                                                             | 6       |
| <b>Methods</b>            |         |                                                                                                                                                                                                              |         |
| Study design              | 4       | Present key elements of study design early in the paper                                                                                                                                                      | 6       |
| Setting                   | 5       | Describe the setting, locations, and relevant dates, including periods of recruitment, exposure, follow-up, and data collection                                                                              | 6       |
| Participants              | 6       | (a) Give the eligibility criteria, and the sources and methods of selection of participants                                                                                                                  | 6       |
| Variables                 | 7       | Clearly define all outcomes, exposures, predictors, potential confounders, and effect modifiers. Give diagnostic criteria, if applicable                                                                     | 7       |
| Data sources/measurement  | 8*      | For each variable of interest, give sources of data and details of methods of assessment (measurement). Describe comparability of assessment methods if there is more than one group                         | 9       |
| Bias                      | 9       | Describe any efforts to address potential sources of bias                                                                                                                                                    | NA      |
| Study size                | 10      | Explain how the study size was arrived at                                                                                                                                                                    | NA      |
| Quantitative variables    | 11      | Explain how quantitative variables were handled in the analyses. If applicable, describe which groupings were chosen and why                                                                                 | 7       |
| Statistical methods       | 12      | (a) Describe all statistical methods, including those used to control for confounding                                                                                                                        | 9       |
|                           |         | (b) Describe any methods used to examine subgroups and interactions                                                                                                                                          | 9       |
|                           |         | (c) Explain how missing data were addressed                                                                                                                                                                  | 9       |
|                           |         | (d) If applicable, describe analytical methods taking account of sampling strategy                                                                                                                           | NA      |
|                           |         | (e) Describe any sensitivity analyses                                                                                                                                                                        | NA      |
| <b>Results</b>            |         |                                                                                                                                                                                                              |         |
| Participants              | 13*     | (a) Report numbers of individuals at each stage of study—eg numbers potentially eligible, examined for eligibility, confirmed eligible, included in the study, completing follow-up, and analysed            | 9       |
|                           |         | (b) Give reasons for non-participation at each stage                                                                                                                                                         | 9       |
|                           |         | (c) Consider use of a flow diagram                                                                                                                                                                           | NA      |
| Descriptive data          | 14*     | (a) Give characteristics of study participants (eg demographic, clinical, social) and information on exposures and potential confounders                                                                     | 10      |
|                           |         | (b) Indicate number of participants with missing data for each variable of interest                                                                                                                          | 10      |
| Outcome data              | 15*     | Report numbers of outcome events or summary measures                                                                                                                                                         | 10      |
| Main results              | 16      | (a) Give unadjusted estimates and, if applicable, confounder-adjusted estimates and their precision (eg, 95% confidence interval). Make clear which confounders were adjusted for and why they were included | 10      |

|                          |    |                                                                                                                                                                            |    |
|--------------------------|----|----------------------------------------------------------------------------------------------------------------------------------------------------------------------------|----|
|                          |    | (b) Report category boundaries when continuous variables were categorized                                                                                                  | 10 |
|                          |    | (c) If relevant, consider translating estimates of relative risk into absolute risk for a meaningful time period                                                           | NA |
| Other analyses           | 17 | Report other analyses done—eg analyses of subgroups and interactions, and sensitivity analyses                                                                             | NA |
| <b>Discussion</b>        |    |                                                                                                                                                                            |    |
| Key results              | 18 | Summarise key results with reference to study objectives                                                                                                                   | 12 |
| Limitations              | 19 | Discuss limitations of the study, taking into account sources of potential bias or imprecision. Discuss both direction and magnitude of any potential bias                 | 14 |
| Interpretation           | 20 | Give a cautious overall interpretation of results considering objectives, limitations, multiplicity of analyses, results from similar studies, and other relevant evidence | 14 |
| Generalisability         | 21 | Discuss the generalisability (external validity) of the study results                                                                                                      | 14 |
| <b>Other information</b> |    |                                                                                                                                                                            |    |
| Funding                  | 22 | Give the source of funding and the role of the funders for the present study and, if applicable, for the original study on which the present article is based              | 16 |

\*Give information separately for exposed and unexposed groups.

**Note:** An Explanation and Elaboration article discusses each checklist item and gives methodological background and published examples of transparent reporting. The STROBE checklist is best used in conjunction with this article (freely available on the Web sites of PLoS Medicine at <http://www.plosmedicine.org/>, Annals of Internal Medicine at <http://www.annals.org/>, and Epidemiology at <http://www.epidem.com/>). Information on the STROBE Initiative is available at [www.strobe-statement.org](http://www.strobe-statement.org).
